# Supplementary material for: Bioconversion of methane to cadaverine and lysine using an engineered type II methanotroph, Methylosinus trichosporium OB3b
Source: Royal Society of Chemistry journal article supplement (doi:10.1039/d0gc02232b), 2020-01-01
Supplement: d0gc02232b1.pdf [file d0gc02232b1.pdf]

**Supplementary Table S1.** Primers used in this study.

| primers                         | Sequence                                     |                                                                                                                                                                                                                                                                                                                                                                                                                                                                                                                                                                                                                                                                                                                                                                                                                                                                                                                        |
|---------------------------------|----------------------------------------------|------------------------------------------------------------------------------------------------------------------------------------------------------------------------------------------------------------------------------------------------------------------------------------------------------------------------------------------------------------------------------------------------------------------------------------------------------------------------------------------------------------------------------------------------------------------------------------------------------------------------------------------------------------------------------------------------------------------------------------------------------------------------------------------------------------------------------------------------------------------------------------------------------------------------|
| pAWP89-Tac-For                  | TAGTTGTCGGGAAGATGCGT                         | For amplifying a pAWP89 backbone containing Ptac promoter                                                                                                                                                                                                                                                                                                                                                                                                                                                                                                                                                                                                                                                                                                                                                                                                                                                              |
| pAWP89-Tac-Rev                  | AGCTGTTTCCTGTGTGAATA                         |                                                                                                                                                                                                                                                                                                                                                                                                                                                                                                                                                                                                                                                                                                                                                                                                                                                                                                                        |
| ldcC-For                        | tattcacacaggaacagctATGAACATCATTGCCATTATGGGAC | For amplifying a <i>ldcC</i> and <i>cadA</i> genes from genomic DNA of <i>E. coli</i> MG1655, the PCR product was ligated into a pAWP89 backbone to construct pAWP89-ldcC or pAWP89- <i>cadA</i> vector<br>For amplifying a <i>lysA</i> and <i>lysC</i> genes from genomic DNA of <i>M. trichosporium</i> OB3b, the PCR product was ligated into the <i>KpnI</i> site of digested pAWP89-ptac-lacZ<br>For amplifying a <i>pyc</i> gene from genomic DNA of <i>Methylobacter</i> sp. DH-1, the PCR product was ligated into the <i>EcoRI</i> site of digested pAWP89-lysA<br>For amplifying a <i>ptac-ldc</i> gene from pAWP89-ldcC, the PCR product was ligated into the <i>BamHI</i> site of digested pAWP89-lysA, pAWP89-lysC, pAWP89-lysA-pyc<br>For amplifying a <i>cadB</i> gene from genomic DNA of <i>E. coli</i> MG1655, the PCR product was ligated into the <i>XbaI</i> site of digested pAWP89-lysA-pyc-ldc |
| ldcC-Rev                        | gcactttcccgacaactaTTATCCCGCCATTTTAGGACTC     |                                                                                                                                                                                                                                                                                                                                                                                                                                                                                                                                                                                                                                                                                                                                                                                                                                                                                                                        |
| cadA-K12-For                    | tattcacacaggaacagctATGAACGTTATTGCAATATT      |                                                                                                                                                                                                                                                                                                                                                                                                                                                                                                                                                                                                                                                                                                                                                                                                                                                                                                                        |
| cadA-K12-Rev                    | gcactttcccgacaactaTTATTTTTTGCTTTCTT          |                                                                                                                                                                                                                                                                                                                                                                                                                                                                                                                                                                                                                                                                                                                                                                                                                                                                                                                        |
| lysA-For                        | gggaacaaaagctgggtacATGCATCATTTTCTGACTATCG    |                                                                                                                                                                                                                                                                                                                                                                                                                                                                                                                                                                                                                                                                                                                                                                                                                                                                                                                        |
| LysA-Rev                        | cgagggggggcccggtacTCACAGCCAATCGGGAACGC       |                                                                                                                                                                                                                                                                                                                                                                                                                                                                                                                                                                                                                                                                                                                                                                                                                                                                                                                        |
| lysC-For                        | gggaacaaaagctgggtacATGGCTCGTCTGGTGATGAA      |                                                                                                                                                                                                                                                                                                                                                                                                                                                                                                                                                                                                                                                                                                                                                                                                                                                                                                                        |
| LysC-Rev                        | cgagggggggcccggtacTCAGGCCGCTCCAGCCCAT        |                                                                                                                                                                                                                                                                                                                                                                                                                                                                                                                                                                                                                                                                                                                                                                                                                                                                                                                        |
| Pyc-For                         | ggtatcgataagcttgatcgATGTTACGCAAAATCCTGAT     |                                                                                                                                                                                                                                                                                                                                                                                                                                                                                                                                                                                                                                                                                                                                                                                                                                                                                                                        |
| Pyc-Rev                         | gatccccgggctgcaggTCAATTTATTTCCACCAACA        |                                                                                                                                                                                                                                                                                                                                                                                                                                                                                                                                                                                                                                                                                                                                                                                                                                                                                                                        |
| P <sub>tac</sub> -ldc-BamHI-For | ttgacctgccagccggggTTGACAATTAATCATCGGCT       |                                                                                                                                                                                                                                                                                                                                                                                                                                                                                                                                                                                                                                                                                                                                                                                                                                                                                                                        |
| P <sub>tac</sub> -ldc-BamHI-Rev | gccgctctagaactagtTATCCCGCCATTTTAGGA          |                                                                                                                                                                                                                                                                                                                                                                                                                                                                                                                                                                                                                                                                                                                                                                                                                                                                                                                        |
| cadB-XbaI-For                   | ggcgggataacactagttTTAACCAACAGTTTTTCTACCTA    |                                                                                                                                                                                                                                                                                                                                                                                                                                                                                                                                                                                                                                                                                                                                                                                                                                                                                                                        |
| cadB-XbaI-Rev                   | accgcggtggcggccgctTTAATGTGCGTTAGACGCGG       |                                                                                                                                                                                                                                                                                                                                                                                                                                                                                                                                                                                                                                                                                                                                                                                                                                                                                                                        |

Homology regions used for Gibson Assembly are in lowercase.

**Supplementary Table S2.** Plasmids and strains used in this study

| Name                         | Relevant characteristics                                                                                                                                                                                                                                            | Reference  |
|------------------------------|---------------------------------------------------------------------------------------------------------------------------------------------------------------------------------------------------------------------------------------------------------------------|------------|
| <b>Plasmids</b>              |                                                                                                                                                                                                                                                                     |            |
| pAWP89-lacZ                  | pAWP89 without dTomato, carrying lacZ reason from pBBR1MCS-2                                                                                                                                                                                                        | 19         |
| pAWP89-ldcC                  | pAWP89-lacZ containing <i>ldcC</i> gene from <i>E.coli</i> driven by $P_{tac}$ promoter                                                                                                                                                                             | This study |
| pAWP89-cadA                  | pAWP89-lacZ containing <i>cadA</i> gene from <i>E.coli</i> driven by $P_{tac}$ promoter                                                                                                                                                                             | This study |
| pAWP89-lysC                  | pAWP89-lacZ containing <i>lysC</i> gene from <i>M. trichosporium</i> OB3b driven by $P_{tac}$ promoter                                                                                                                                                              | This study |
| pAWP89-lysA                  | pAWP89-lacZ containing <i>lysA</i> gene from <i>M. trichosporium</i> OB3b driven by $P_{tac}$ promoter                                                                                                                                                              | This study |
| pAWP89-lysA-pyc              | pAWP89-lacZ containing <i>lysA</i> gene from <i>M. trichosporium</i> OB3b and <i>pyc</i> gene from <i>Methylomonas</i> sp. DH-1 driven by $P_{tac}$ promoter                                                                                                        | This study |
| pAWP89-lysC-ldcC             | pAWP89-lacZ containing <i>lysC</i> gene from <i>M. trichosporium</i> OB3b, <i>ldcC</i> gene from <i>E.coli</i> driven by $P_{tac}$ promoter                                                                                                                         | This study |
| pAWP89-lysA-ldcC             | pAWP89-lacZ containing <i>lysA</i> gene from <i>M. trichosporium</i> OB3b, <i>ldcC</i> gene from <i>E.coli</i> driven by $P_{tac}$ promoter                                                                                                                         | This study |
| pAWP89-lysA-pyc-ldcC         | pAWP89-lacZ containing <i>lysA</i> gene from <i>M. trichosporium</i> OB3b and <i>pyc</i> gene from <i>Methylomonas</i> sp. DH-1, <i>ldcC</i> gene from <i>E.coli</i> driven by $P_{tac}$ promoter                                                                   | This study |
| pAWP89-lysA-pyc-ldcC-cadB    | pAWP89-lacZ containing <i>lysA</i> gene from <i>M. trichosporium</i> OB3b and <i>pyc</i> gene from <i>Methylomonas</i> sp. DH-1, <i>ldcC</i> gene from <i>E.coli</i> driven by $P_{tac}$ promoter, <i>cadB</i> gene from <i>E.coli</i> driven by $P_{tac}$ promoter | This study |
| <b>Strains</b>               |                                                                                                                                                                                                                                                                     |            |
| <i>Escherichia coli</i>      |                                                                                                                                                                                                                                                                     |            |
| MG1655                       | Cloning host                                                                                                                                                                                                                                                        | Invitrogen |
| Methanotrophs                |                                                                                                                                                                                                                                                                     |            |
| <i>M. trichosporium</i> OB3b | Wild type strain                                                                                                                                                                                                                                                    | 19         |
| <i>Methylomonas</i> sp. DH-1 | A novel type I, isolated from brewery waste sludge                                                                                                                                                                                                                  | 36         |
| OB3b/ <i>ldcC</i>            | <i>M. trichosporium</i> OB3b harboring pAWP89-ldcC                                                                                                                                                                                                                  | This study |
| OB3b/ <i>cadA</i>            | <i>M. trichosporium</i> OB3b harboring pAWP89-cadA                                                                                                                                                                                                                  | This study |
| Ob3b/ <i>cad1</i>            | <i>M. trichosporium</i> OB3b harboring pAWP89-lysC-ldcC                                                                                                                                                                                                             | This study |
| Ob3b/ <i>cad2</i>            | <i>M. trichosporium</i> OB3b harboring pAWP89-lysA-ldcC                                                                                                                                                                                                             | This study |
| Ob3b/ <i>cad3</i>            | <i>M. trichosporium</i> OB3b harboring pAWP89-lysA-pyc-ldcC                                                                                                                                                                                                         | This study |
| Ob3b/ <i>cad4</i>            | <i>M. trichosporium</i> OB3b harboring pAWP89-lysA-pyc-ldcC-cadB                                                                                                                                                                                                    | This study |
