# Supplementary material for: Bioconversion of methane to cadaverine and lysine using an engineered type II methanotroph, Methylosinus trichosporium OB3b
Source: Royal Society of Chemistry journal article supplement (doi:10.1039/d0gc02232b), 2020-01-01
Supplement: d0gc02232b3.xlsx [file d0gc02232b3.xlsx]

## Sheet: Decscription of the tabs
Descriptions of the tabs in Flux simulations.xlsx supplementary file:
FVA in AMS medium.csv à Flux variability analysis for iMsOB3b.json in AMS medium in csv format
FVA in NMS medium.csv à Flux variability analysis for iMsOB3b.json in NMS medium in csv format
lysA overexpression in NMS medium.csv à parsimonious flux variability analysis for lysA overexpression in iMsOB3b_cadaverine_reactions_added.json in NMS medium in csv format
lysC overexpression in NMS medium à parsimonious flux variability analysis for lysC overexpression in iMsOB3b_cadaverine_reactions_added.json in NMS medium in csv format
MCMC sampling in AMS medium.csv à MCMC sampling flux distribution of iMsOB3b.json reactions in AMS medium in csv format
MCMC sampling in NMS medium.csv à MCMC sampling flux distribution of iMsOB3b.json reactions in NMS medium in csv format

## Sheet: FVA in AMS medium
	minimum	maximum
EAOXRED	0.000129109	0.000129109
IMPC	0.0563931	0.0563931
HACD8i	-0.00106992	-0.00106992
PANTS	3.66878e-05	3.66878e-05
IMPD	0.0202674	0.0202674
OCPPH3	3.66878e-05	3.66878e-05
PGSA161	0.000167601	0.000167601
LCAD	0	0
PGSA160	0.000166291	0.000166291
PPAtex	0	0
DTMPK	0.00255411	0.00255411
PPND	0.0126477	0.0126477
DXPRIi	0.00103093	0.00103093
PC11M	3.66878e-05	3.66878e-05
PSERTr	0.301667	0.301667
CAT	0.0152553	0.0152553
CYO_2p	14.9	16.0334
UAMAS	1.67067e-05	1.67067e-05
MNEUROPNDH3	6.45545e-05	6.45545e-05
EX_DM_trnathr	-0.051398	-0.051398
MNEUROPNDH2	6.45545e-05	6.45545e-05
2AGPEAT161acp	0	0
PEPGLYCANGT	1.67067e-05	1.67067e-05
MTHFC	3.79713	3.79713
MTHFD	3.79713	3.79713
THRD_L	0.0348451	0.0348451
EAR60y	0.0186014	0.0186014
CDPMEK	0.00103093	0.00103093
PGMT	-0.165804	-0.165804
PGSA181	0.00261008	0.00261008
PItex	0.116818	0.116818
ASPCTr	0.0293267	0.0293267
MALtex	0	0
CYTK1	0.0114492	0.0114492
SUCCOAH	0	8.94736e-13
HNEUROPNMT2	0	0
2AGPEAT180acp	0	0
HNEUROPNMT3	0	0
HNEUROPNMT4	0	0
DHPPDA2	9.17196e-05	9.17196e-05
PGSA180	0.000160491	0.000160491
CITtex	0	0
PHYNDH_e	0	0
HNEUROPNMT6	6.45545e-05	6.45545e-05
HNEUROPNMT5	6.45545e-05	6.45545e-05
GLYCL_3	0	0
EX_ac_e	0	0
EX_etma_e	0	0
EDTXS1	1.67067e-05	1.67067e-05
PRE3BS	3.66878e-05	3.66878e-05
HACD1	-10.8676	0
HACD2	-0.00217851	-0.00217851
HACD5	-0.00217851	-0.00217851
HACD6	-0.00217851	-0.00217851
HACD3	-0.00217851	-0.00217851
MTRI2	0	0
HACD4	-0.00217851	-0.00217851
ARGTRS	0.0402647	0.0402647
AACPS3	0.00110859	0.00110859
AACPS4	0	1.11842e-13
SHK3Dr	-0.0355134	-0.0355134
AACPS5	0	1.11842e-13
AACPS6	0.00106992	0.00106992
IGPS	0.00010091	0.00010091
EX_h2o_e	26.8396	26.8396
GLYCLTDx	-1.36727e-05	-1.36727e-05
SULabcpp	0.0105439	0.0105439
HACD7	-0.00217851	-0.00217851
SHCHD2	3.66878e-05	3.66878e-05
RIBONAtex	0	0
ADK1	1.21946	1.21946
PC6YM	3.66878e-05	3.66878e-05
EX_pyr_e	0	0
SALMMT	0	0
GFUCS	0	0
GMPS	-2.23684e-13	0
POLYPIP	0	0
DNTPPA	1.36727e-05	1.36727e-05
MALTATr	0	0
ACACt2pp	0	0
PYRtex	0	0
GLUTRS	0.0459901	0.0459901
ATPM	3.5	3.5
FE2tex	0.00134134	0.00134134
GLXDH	0	0
MOBDMPTL	3.66878e-05	3.66878e-05
HACYLCOAEPI100	0	0
DB4PS	0.000183439	0.000183439
LEUTRS	0.0663171	0.0663171
GLUPRT	0.0451088	0.0451088
HNEUROPNMT	0	0
PTPAT	3.66878e-05	3.66878e-05
DDPA	0.0355134	0.0355134
ASPtex	0	0
FBA	0.30025	0.30025
HEXTT	3.66878e-05	3.66878e-05
RIBtex	0	0
AKGDH	0	5.04076e-14
LYXtex	0	0
EAR181y	0.0174005	0.0174005
2KDRIBtex	0	0
ALATRS	0.184341	0.184341
PC17M	3.66878e-05	3.66878e-05
HSERTA	0.00948073	0.00948073
TKT1	0.0436841	0.0436841
LPLIPAL2C161	0	0
CCR	0	0.0163195
PHETRS	0.0227144	0.0227144
P5CR	0.051931	0.0682505
EX_5dglcn_e	0	0
ACACT7r	-0.00217851	-0.00217851
ACACT5r	-0.00217851	-0.00217851
P5CD	0	2.23684e-13
ETFDH	1.59367	1.59367
PYAM5POr	0	0
LYSTRS	0.0430263	0.0430263
EAR141y	0.0185179	0.0185179
UDPGLCUREPI	0	0
PC8XM	3.66878e-05	3.66878e-05
ACACT6r	-0.00217851	-0.00217851
FBP	0	1.74085
DALAOX	0	7.45613e-14
EX_for_e	0	0
KAT8	-0.00106992	-0.00106992
DHAtpp	0	0
EAR140y	0	4.47368e-14
ADCPS2	3.66878e-05	3.66878e-05
LPLIPAL2C181	0	0
EAR80y	0.0186014	0.0186014
LPLIPAL2C180	0	0
EX_h_e	-1.17654	0
MOBDabcpp	0.000588008	0.000588008
DHORD	0.0293267	0.0293267
EAR160y	0	4.47368e-14
PEMT181	0	0
PEMT180	0	0
SOTA	0	0
APRAUR	9.17196e-05	9.17196e-05
CA2tex	0.00150694	0.00150694
ACACT4r	-0.00217851	-0.00217851
AICART	0.0563931	0.0563931
NADS1	-2.23684e-13	0
HACYLCOAEPI140	0	0
NADS2	0.00114719	0.00114719
HPPK2	1.36727e-05	1.36727e-05
COBALT2tpp	3.66878e-05	3.66878e-05
RNDR3	0.00810891	0.00810891
ENCOAI81	0	0
RNDR2	0.0055548	0.0055548
UAGDP	0.0056116	0.0056116
PDX5PS2	3.66878e-05	3.66878e-05
RNDR1	0.00255411	0.00255411
AKGtex	0	0
PUNP8	0	0
L_LALDtex	0	0
PUNP9	0.000110063	0.000110063
L_LACt2rpp	0	0
EAR40y	0.0186014	0.0186014
ALAGLUEPI	0	0
GPDDA1	0	0
GPDDA2	0	0
DAHETBCLPHDDH	0	0
PUNP7	0	0
EX_DM_trnaala	-0.184341	-0.184341
GLNTRAT	0.0463443	0.0463443
ACACT3r	-0.00217851	-0.00217851
EX_DM_trnaile	-0.0348451	-0.0348451
EX_photon_e	0	0
DCAtex	0	0
3HBCDH	0	10.8676
GCALDDr	1.36727e-05	1.36727e-05
ACACT2r	-0.00217851	-0.00217851
PPNDH	0.0227144	0.0227144
EX_xylnt_D_e	0	0
FPGS8	0	0
ACtex	0	0
AHC	0.000606051	0.000606051
ALATA_D	0.184391	0.184391
ZCARDS2	6.45545e-05	6.45545e-05
ADSK	0.0098639	0.0098639
GTPCII2	9.17196e-05	9.17196e-05
HACYLCOAEPI120	0	0
LYXNTtex	0	0
ENCOAI61	0	0
TDSK	1.67067e-05	1.67067e-05
APG3PAT160	0.000554296	0.000554296
ACALDtpp	0	0
APG3PAT161	0.000558687	0.000558687
ADSS	0.0361257	0.0361257
FACOAL60	0	1.11842e-13
EX_DM_AMOB	3.66878e-05	3.66878e-05
ACACT1r	1.64219	1.64219
GLUTRS_Gln_	0.0463443	0.0463443
CYOO_4p	0	1.13344
MEOHDH	14.9	14.9
PHYNS	6.45545e-05	6.45545e-05
CDPGD	0	0
G2PP	0	0
TRPS1r	0	0.00010091
OPHBDC	3.66878e-05	3.66878e-05
ENCOAI41	0	0
TSULtex	0	0
SORBNLDH	0	0
APG3PAT180	0.00053496	0.00053496
APG3PAT181	0.00870024	0.00870024
APH181	0	1.11842e-13
ACPpds	0	7.45613e-14
EX_rib_D_e	0	0
CHORS	0.0355134	0.0355134
APH180	0	1.11842e-13
CHORM	0.0353621	0.0353621
SUCOAS	0	2.98245e-13
FACOAL80	0	1.11842e-13
5DGLCNR	0	0
PPDK	0	2.23684e-13
BTCAL	0	0
H2MB4PRD	0.000212569	0.000212569
GTHS	3.66878e-05	3.66878e-05
XYLNTtex	0	0
APH161	0	1.11842e-13
TRPS3r	-1.11842e-13	0.00010091
ADPT	0.000110063	0.000110063
EX_DM_trnatrp	-0.00010091	-0.00010091
CATetoh	0	0
ACS	0	2.23684e-13
MREDR	0	0
PPPGO	7.33757e-05	7.33757e-05
USHD	1.67067e-05	1.67067e-05
ZCARDS	6.45545e-05	6.45545e-05
EX_ca2_e	-0.00082698	-0.00082698
APH160	0	1.11842e-13
UAGAAT	3.34133e-05	3.34133e-05
CA2abctpp	0.00150694	0.00150694
HSTPTr	0.0113209	0.0113209
ZCARDS2_e	0	0
EX_lald_L_e_	0	0
TRPTRS	0.00010091	0.00010091
PROD2	0	0.0163195
DHORTS	0.0293267	0.0293267
MOGDS	3.66878e-05	3.66878e-05
EAR161y	0.0185179	0.0185179
CYSTRS	0.000163047	0.000163047
3HAD121	0.0185179	0.0185179
3HAD120	8.35333e-05	8.35333e-05
IPMD2r	0.0663171	0.0663171
FCLPA	0	0
EX_dca_e	0	0
COCHL	3.66878e-05	3.66878e-05
CPPPGO	7.33757e-05	7.33757e-05
EX_galcDarab_e	0	0
HISTDADH	0.0113209	0.0113209
EX_tsul_e	0	0
ASPTA	-0.373892	-0.373892
KAT141	0	0
TARTRtex	0	0
PSD161	0.000379909	0.000379909
GLU5K	0.051931	0.051931
PSD160	0.000376919	0.000376919
TARTR_Ltpp	0	0
DXPS	0.00106762	0.00106762
FACOAL121	0	0
FACOAL120	0	1.11842e-13
VALTRS	0.070173	0.070173
EX_D_araba_e	0	0
PHAS	1.59579	1.59579
EX_mg2_e	-0.0013783	-0.0013783
SUCCD1	1.59249	1.59249
MEPCT	0.00103093	0.00103093
EX_lac_L_e	0	0
METAT	0.00078949	0.00078949
ETOHtex	0	0
3HAD100	0.0186014	0.0186014
FRDOr	0.00103093	0.00103093
THRTRS	0.051398	0.051398
EX_co2_e	8.18735	8.18735
TMPPP	3.66878e-05	3.66878e-05
KAT121	0	0
HACDHG	0	0
PRMICI	0.0113209	0.0113209
EX_araba_e	0	0
VALTA	0.070173	0.070173
FCLT	7.33757e-05	7.33757e-05
PRFGS	0.0451088	0.0451088
MFPGS5	0	0
TYRTA	0.0126477	0.0126477
T2DECAI	0.0185179	0.0185179
THMBIOS2	3.66878e-05	3.66878e-05
THMBIOS3	3.66878e-05	3.66878e-05
THMBIOS4	3.66878e-05	3.66878e-05
PPCDC	3.66878e-05	3.66878e-05
FACOAL100	0	1.11842e-13
PPA2	3.66878e-05	3.66878e-05
RPI	-0.0434672	-0.0434672
DHXANTI	0	0
EX_DM_trnaphe	-0.0227144	-0.0227144
ORPT	0.0293267	0.0293267
DHXANTH	0	0
GMPS2	0.0202674	0.0202674
PYK	-3.03788	-1.75276
RPE	-0.0436841	-0.0436841
PTA2	0	0
ASAD	0.138804	0.138804
ACPS1	0	7.45613e-14
FMNRx2	-5.50317e-05	-5.50317e-05
HACOAEPI141	0	0
BMMALCOAL	1.59367	1.59367
EX_DM_thif	0	0
PRAMPC	0.0113209	0.0113209
FUM	1.71396	1.71396
EX_fe2_e	-0.00134134	-0.00134134
EX_acac_e	0	0
EX_DM_thil	0	0
KAT181	0	0
HGBAMS	3.66878e-05	3.66878e-05
DHDPRy	0.043043	0.043043
EX_DM_trnagln	-0.0463443	-0.0463443
BRFAPS	0	0
EX_DM_this	0	0
EX_ppa_e	0	0
LPLIPAL1E181	0	0
LEUTAi	0.0663171	0.0663171
EX_DM_trnaglu	-0.0459901	-0.0459901
ACONT	0.192178	0.192178
EX_DM_trnagly	-0.195886	-0.195886
FPGS10	0	0
ENCOAI162	0	0
FACOAL161	0	0
ENCOAI161	0	0
FACOAL160	0	1.11842e-13
NNDMBRT	3.66878e-05	3.66878e-05
ALAR	-0.184358	-0.184358
ALAS	0.00117401	0.00117401
ORNDC	0.00758081	0.00758081
NADK	0.000407983	0.000407983
EX_cu2_e	-0.00055132	-0.00055132
DBTSr	3.66878e-05	3.66878e-05
GLUtex	0	0
HACOAEPI121	0	0
GAPD	-0.616066	-0.616066
CU2abcpp	0	1.11842e-13
KDOPS	3.34133e-05	3.34133e-05
GLYAMDTRc	0	0
UPP3S	0.000146751	0.000146751
UPP3MT	7.33757e-05	7.33757e-05
KDOPP	3.34133e-05	3.34133e-05
THD2pp	0	8.94736e-13
EX_so4_e	-0.0105439	-0.0105439
ETHMALCOAM	1.59367	1.59367
LPLIPAL1E160	0	0
LPLIPAL1E161	0	0
KAT161	0	0
HSK	0.0862798	0.0862798
EX_glyclt_e	0	0
MLMPTDHy	0	10.8676
PHBD2	1.54945	1.54945
ENCOAI182	0	0
FACOAL141	0	0
ENCOAI181	0	0
FRTT	0.000165797	0.000165797
FACOAL140	0	1.11842e-13
ASP1DC	3.66878e-05	3.66878e-05
DHQS	0.0355134	0.0355134
CBPS	0.0695914	0.0695914
LDH_L	0	0
ETHAtex	0	0
THZS	3.66878e-05	3.66878e-05
DNMPPA	1.36727e-05	1.36727e-05
EX_mobd_e	-0.000588008	-0.000588008
DHQD	0.0355134	0.0355134
CLt4	0.00082698	0.00082698
GLYTRS	0.195886	0.195886
Kabcpp	0.0308188	0.0308188
PPAt7	0	0
MALDHDC	0	2.23684e-13
HNEUROPNS2	6.45545e-05	6.45545e-05
EX_dha_e	0	0
HNEUROPNS1	6.45545e-05	6.45545e-05
ACPPAT181	0.00870024	0.00870024
UAAGDS	1.67067e-05	1.67067e-05
SDPDS	0.043043	0.043043
HACOAEPI181	0	0
MCPST	0	0
ACPPAT180	0.00053496	0.00053496
AIRCr	0.0450722	0.0450722
IG3PS	0.0113209	0.0113209
MOBDtex	0.000588008	0.000588008
GLYCLTtex	0	0
ACOTA	-0.0478455	-0.0478455
TMDS	0	0
PRAIS	0.0451088	0.0451088
ANACMURLALAA	0	0
UPPDC1	7.33757e-05	7.33757e-05
ARABA_Dtex	0	0
EX_arab_D_e	0	0
SPOTN	3.66878e-05	3.66878e-05
3OAR40	0.0186014	0.0186014
XYLtex	0	0
SSALyr	0	0
UDPGDr	0	0
DTPCUDCPPP	1.67067e-05	1.67067e-05
PPC	0	1.28513
PPA	0	1.74085
BTCOAC	0	2.23684e-13
3HAD181	0.0174005	0.0174005
PPDODH	0	0
3HAD180	0	2.23684e-13
ACPPAT161	0.000558687	0.000558687
ACPPAT160	0.000554296	0.000554296
HACOAEPI161	0	0
MLMPTDH	4.03236	14.9
PRAI	0.00010091	0.00010091
CBLAT	0	0
DPCOAK	3.66878e-05	3.66878e-05
FTHFL	3.89863	3.89863
EX_akg_e	0	0
ILETRS	0.0348451	0.0348451
ASPO6	0.00114719	0.00114719
PRE5MT	3.66878e-05	3.66878e-05
FACOAL180	0	1.11842e-13
FACOAL181	-2.23684e-13	0
FALDHp	0	0
TRSARr	0	0
DHOANTC	0	0
PRBK	0	0
LPLIP2AGPC160	0	0
DHFS	1.36727e-05	1.36727e-05
PGPP160	0.000166291	0.000166291
DHFR	1.36727e-05	1.36727e-05
EX_meoh_e	0	0
PGPP161	0.000167601	0.000167601
3HAD160	0	4.47368e-14
3HAD161	0.0185179	0.0185179
LGTHL	0	0
PTAr	-0.0890397	-0.0890397
FMFTFMPT	14.9	14.9
PMPK	3.66878e-05	3.66878e-05
GMAND	0	0
G3PD2	0.0134527	0.0134527
12PPDStex	0	0
3OAR80	0.0186014	0.0186014
METTRS	0.00940735	0.00940735
TRPS2	0	0.00010091
AMAOTr	3.66878e-05	3.66878e-05
FALDA	0	0
ADOCBLPS	0	3.66878e-05
H2MPTR2	5.5132e-05	5.5132e-05
PRATPP	0.0113209	0.0113209
OMMBZH2	3.66878e-05	3.66878e-05
ADMDCr	0	0
PGPP180	0.000160491	0.000160491
EX_DM_5dr1p	0.000110063	0.000110063
3HAD140	0	4.47368e-14
PGPP181	0.00261008	0.00261008
TMPKr	3.66878e-05	3.66878e-05
3HAD141	0.0185179	0.0185179
EX_h2o2_e	0	0
EX_asp_L_e	0	0
EX_DM_trnaleu	-0.0663171	-0.0663171
DUTPDP	0.00255411	0.00255411
3PSMES	0.0355134	0.0355134
FMETTRS	0	0
NAtex	0.000679961	0.000679961
MI3PP	0	0
2AGPEAT160acp	0	0
OCOAT1r	1.54945	1.54945
ADCMS2	0	0
PSD181	0.00591616	0.00591616
PSD180	0.000363771	0.000363771
3OAR60	0.0186014	0.0186014
ADOCBIK	0	0
PERD	3.66878e-05	3.66878e-05
H2MB4P	0.00103093	0.00103093
UDPACGAM	0	0
HACOADH121	0	0
E4PD	3.66878e-05	3.66878e-05
CLtex	0.00082698	0.00082698
KDOCT	3.34133e-05	3.34133e-05
3OAR160	0	4.47368e-14
ADSL1r	0.0361257	0.0361257
3OAR161	0.0185179	0.0185179
PHYNS2	6.45545e-05	6.45545e-05
PGI	0.171738	0.171738
HFACOAE60	0	0
PGK	0.616066	0.616066
GF6PTAr	0.0056116	0.0056116
UAMAGS	1.67067e-05	1.67067e-05
PGM	0.917733	0.917733
MMPTC	14.9	14.9
MG2tex	0.0013783	0.0013783
MPTAT	3.66878e-05	3.66878e-05
FUMtex	0	0
EX_cl_e	-0.00082698	-0.00082698
LPLIP1AGPC160	0	0
PPBNGS	0.000587005	0.000587005
PAPR	0.0098639	0.0098639
PYRt2rpp	0	0
PSP_D	0	0
MALCOATE	0	2.23684e-13
OCMPH2	3.66878e-05	3.66878e-05
PIt2rpp	0.116818	0.116818
PSP_L	0.301667	0.301667
SPMS	0	0
FACOAE180	0.00106992	0.00106992
EX_pi_e	-0.116818	-0.116818
UGMDDS	1.67067e-05	1.67067e-05
OCBT	0.0402647	0.0402647
MNtex	0.00055132	0.00055132
HEMEOS	3.66878e-05	3.66878e-05
BDH	1.54945	1.54945
G5SD	0.051931	0.051931
AGPR	0.0478455	0.0478455
3OAR140	6.68266e-05	6.68266e-05
3OAR141	0.0185179	0.0185179
EX_ribona_e	0	0
OHPHM	3.66878e-05	3.66878e-05
GALCDARABtex	0	0
O2tex	22.9326	23.2268
ARABAtex	0	0
MAN1PT	0	0
ADSL2r	0.0450722	0.0450722
TALA	-0.0436841	-0.0436841
AGPAT161	0.000558687	0.000558687
3HAD60	0.0186014	0.0186014
PGCDr	0.301667	0.301667
AGPAT160	0.000554296	0.000554296
GTHPp	0	1.11842e-13
FACOAE160	0.00110859	0.00110859
PDH	1.21651	1.21651
3OAR120	8.35333e-05	8.35333e-05
ILETA	0.0348451	0.0348451
3OAR121	0.0185179	0.0185179
MTAP	0	0
EX_k_e	-0.0308188	-0.0308188
H2Otex	-26.8396	-26.8396
DAPE	0.043043	0.043043
ASPK	0.138804	0.138804
EX_DM_h2mpt	-5.5132e-05	-5.5132e-05
NO3tex	0	0
EX_xyl_D_e	0	0
HMPK1	0	0
Htex	0	1.17654
PDX5PO	3.66878e-05	3.66878e-05
UPP3MT2	7.33757e-05	7.33757e-05
FORtex	0	0
GTHOr	0	1.11842e-13
ACS2	0	0
AGPAT180	0.00053496	0.00053496
G5SADr	0.051931	0.051931
AGPAT181	0.00870024	0.00870024
EX_etoh_e	0	0
UAPGR	1.67067e-05	1.67067e-05
NDPK8	0.00255411	0.00255411
NDPK7	0.00810891	0.00810891
ATPS4rpp	28.7366	28.7366
3HAD80	0.0186014	0.0186014
NDPK5	0.0055548	0.0055548
NDPK4	0.1045	0.1045
NDPK3	0.0033403	0.0033403
FACOAE140	0	1.11842e-13
NDPK2	0.0987965	0.0987965
NDPK1	0.050875	0.050875
CA2NAtpp	0.000679961	0.000679961
METACH	0.00948073	0.00948073
GGTT	3.66878e-05	3.66878e-05
ANPRT	0.00010091	0.00010091
AKGt2rpp	0	0
EX_12ppd_S_e	0	0
HFACOAE80	0	0
3OAR100	0.0186014	0.0186014
MECDPS	0.00103093	0.00103093
GLNS	1.67027	1.67027
F6PPKL	0.0792158	0.0792158
Zn2tex	0.00055132	0.00055132
MG2uabcpp	0.0013783	0.0013783
ACOATA	0.0186014	0.0186014
EX_fald_e	0	0
EX_nh4_e	-1.92838	-1.63425
MOHMT	3.66878e-05	3.66878e-05
CMBLD2	0	0
5DGLCNtex	0	0
AGDC_r	0	0
HCO3E	1.81081	3.09593
CMBLD4	0	0
CMBLD3	0	0
OXAFORtpp	0	0
EX_na1_e	-0.000679961	-0.000679961
EX_oxa_e	0	0
PHYNDH2	6.45545e-05	6.45545e-05
QULNS	0.00114719	0.00114719
GLUCYS	3.66878e-05	3.66878e-05
EX_glc_e	0	0
IGPDH	0.0113209	0.0113209
ICDHyr	0.192178	0.192178
MACACI	0	0
FORMMFRHD	14.9	14.9
R3HAD40	0.0186014	0.0186014
ENCOAI141	0	0
ENCOAI142	0	0
ACGLCAM	0	0
ARGSSr	0.0402647	0.0402647
FACOAE60	0	1.11842e-13
ACOAD161	0	0
UMPK	0.0293601	0.0293601
PRASCS	0.0450722	0.0450722
ASNS1	0	0
SDPTA	0.043043	0.043043
TPI	0.31485	0.31485
PSSA181	0.00609016	0.00609016
PSSA180	0.000374469	0.000374469
NH4tpp	1.63425	1.63425
TRE6PP	0.00593454	0.00593454
TRE6PS	0.00593454	0.00593454
THRPD	3.66878e-05	3.66878e-05
ACBIPGT	3.66878e-05	3.66878e-05
MAN6PI	0	0
THRPS	3.66878e-05	3.66878e-05
MESACOAH	1.59367	1.59367
LPLIPAL1C180	0	0
ADCYRS	3.66878e-05	3.66878e-05
LPLIPAL1C181	0	0
EX_DM_trnacys	-0.000163047	-0.000163047
EX_no3_e	0	0
ETOHDH	0	0
ARGSL	0.0402647	0.0402647
PTHPS	0	0
ENCOAI121	0	0
ASPTRNAAMT	0.0417182	0.0417182
EX_o2_e	-23.2268	-22.9326
ACODA	0	2.23684e-13
ENCOAI122	0	0
RZ5PP	0	3.66878e-05
ASPTRS	0.0413974	0.0413974
NNAMr	0	0
UDPG4E	0	0
ACGS	0	2.23684e-13
ACOAD181	0	0
Ktex	0.0308188	0.0308188
HACOADH181	0	0
HACOADH180	0	0
HTHRPD	3.66878e-05	3.66878e-05
ACGK	0.0478455	0.0478455
FACOAE80	0	1.11842e-13
CMPKDOT2	1.67067e-05	1.67067e-05
CMPKDOT1	1.67067e-05	1.67067e-05
HEMEDS2	3.66878e-05	3.66878e-05
SPODM	0	0
PSSA161	0.000391086	0.000391086
PSSA160	0.000388005	0.000388005
GLYCOX3	0	0
GLYCOX4	0	0
OXAtex	0	0
PPNCL2	3.66878e-05	3.66878e-05
GLYCOX5	3.66878e-05	3.66878e-05
UHGADA	3.34133e-05	3.34133e-05
THRS	0.0862798	0.0862798
BB_RMN	0.101946	0.101946
METSr	0.0100868	0.0100868
EX_DM_trnahis	-0.0113209	-0.0113209
THRA	0	7.15788e-13
LPLIPAL1C161	0	0
HMBS	0.000146751	0.000146751
CYSTL	0	0
CYSSr	0.00027311	0.00027311
ACOAD121	0	0
CBIAT	0	0
FMNAT	3.66878e-05	3.66878e-05
ENCOAI101	0	0
PGLYCP	0	0
KARA2	0.0348451	0.0348451
HACOADH160	0	0
HACOADH161	0	0
DHPS2	1.36727e-05	1.36727e-05
SADT	0.0098639	0.0098639
PC20M	3.66878e-05	3.66878e-05
KARA1	0.136527	0.136527
2DRIBOAtex	0	0
IPPMIb	0.0663171	0.0663171
G1PTT	0.101946	0.101946
SKMK	0.0355134	0.0355134
EX_fum_e	0	0
PC6AR	3.66878e-05	3.66878e-05
3OAR181	0.0174005	0.0174005
GLYCK2	4.02669	4.02669
H2O2tpp	-4.47368e-13	0
H2MB4PRD2	0.000818359	0.000818359
EX_DM_trnapro	-0.051931	-0.051931
U23GAAT	3.34133e-05	3.34133e-05
THMBTHIC	3.66878e-05	3.66878e-05
ACOAD141	0	0
DPR	3.66878e-05	3.66878e-05
SERGLXAT	4.02669	4.02669
EX_2kdrib_e	0	0
3OAR180	0	2.23684e-13
HACOADH141	0	0
5DGLCNt2rpp	0	0
MPTFALDA	14.9	14.9
3HBCD	-1.59579	1.59585
PMDPHT	9.17196e-05	9.17196e-05
CO2tex	-8.18735	-8.18735
NTD10	0	0
NTD11	0	0
EX_lyxnt_e	0	0
ACKr	0.00982394	0.00982394
ACLS	0.136527	0.136527
FALDtpp	14.9	14.9
HSDyi	0.0957605	0.0957605
ATPPRTr	0.0113209	0.0113209
NNDPR	0.00114719	0.00114719
NO3Ras	0	0
EX_DM_trnaarg	-0.0402647	-0.0402647
PPTT	3.66878e-05	3.66878e-05
PTRCtex	0	0
GLUSy	1.36107	1.36107
LPLIPAL2E180	0	0
EX_succ_e	0	0
LPLIPAL2E181	0	1.11842e-13
PIuabcpp	0	2.98245e-13
THMBIOS	3.66878e-05	3.66878e-05
FE2t2pp	0.00134134	0.00134134
NNATr	0.00114719	0.00114719
EX_DM_trnalys	-0.0430263	-0.0430263
ARAB_Dtex	0	0
ALDD2y	0	7.15788e-13
HPTRED	0	0
PHYNDH2_e	0	0
MPTSA	7.33757e-05	7.33757e-05
TRDR	0.0260817	0.0260817
FE2abcpp	0	2.98245e-13
ZCARDS_e	0	0
3OAS100	0.0186014	0.0186014
PGAMT	-0.0056116	-0.0056116
OMBZLM	3.66878e-05	3.66878e-05
ETHMALCOAEPM	1.59367	1.59367
RBFK	9.17196e-05	9.17196e-05
MNt2pp	0.00055132	0.00055132
HBZOPT	3.66878e-05	3.66878e-05
LPLIPAL2E160	0	0
DHNPA2	1.36727e-05	1.36727e-05
LPLIPAL2E161	-1.11842e-13	0
PHYNDH	6.45545e-05	6.45545e-05
EX_DM_trnatyr	-0.012611	-0.012611
EX_lyx_L_e	0	0
CHRPL	3.66878e-05	3.66878e-05
SERAT	0.00027311	0.00027311
PPCOAC	1.59367	1.59367
H2O2syn	0	1.11842e-13
TYRTRS	0.012611	0.012611
2AGPEAT181acp	-1.11842e-13	0
PMANM	0	0
NTD9	0	0
HFACOAE180	0	0
NTD7	-0.000606051	-0.000606051
EX_DM_rbrdxOX	0	0
L_LACtex	0	0
UDPDPS5	1.00841e-05	1.00841e-05
UDPDPS6	1.00841e-05	1.00841e-05
UDPDPS3	1.00841e-05	1.00841e-05
ENO	3.10896	3.10896
UDPDPS4	1.00841e-05	1.00841e-05
MME	1.59367	1.59367
CYRDAAT	3.66878e-05	3.66878e-05
H2Otpp	-11.9396	-11.9396
UDPDPS9	1.00841e-05	1.00841e-05
UDPDPS7	1.00841e-05	1.00841e-05
GHMT2r	3.78445	3.78445
UDPDPS8	1.00841e-05	1.00841e-05
3OAS121	0.0185179	0.0185179
3OAS120	8.35333e-05	8.35333e-05
MMM2r	1.59367	1.59367
AACOAR	0	3.19164
ADOCBLPPA	0	3.66878e-05
ECOAH5	-0.00217851	-0.00217851
ECOAH6	-0.00217851	-0.00217851
BB_ACGAM	0.00554477	0.00554477
ECOAH3	-0.00217851	-0.00217851
ECOAH4	-0.00217851	-0.00217851
AOXSr	3.66878e-05	3.66878e-05
GARFT	0.0451088	0.0451088
ECOAH7	-0.00217851	-0.00217851
COBS2	0	3.66878e-05
ECOAH8	-0.00106992	-0.00106992
EX_DM_trnaasn	-0.0417182	-0.0417182
ECOAH1	0	3.19164
ECOAH2	-0.00217851	-0.00217851
EX_DM_trnaasp	-0.0413974	-0.0413974
CO2tpp	-8.18735	-8.18735
FMNDESTRUC	1.83439e-05	1.83439e-05
TDPGDH	0.101946	0.101946
PHETA1	0.0227144	0.0227144
HISTP	0.0113209	0.0113209
ADCS	1.36727e-05	1.36727e-05
GALU	0.0638582	0.0638582
CCRC	1.59367	1.59367
IPPS2	0.0663171	0.0663171
HISTRS	0.0113209	0.0113209
ACOAD2f	-0.00217851	-0.00217851
CU2abctpp	0.00055132	0.00055132
MMAtex	0	0
PEMT160	0	0
HACYLCOAEPI80	0	0
ADCL	1.36727e-05	1.36727e-05
PEMT161	0	0
EX_etha_e	0	0
CTPS2	0.0226427	0.0226427
ACHBS	0.0348451	0.0348451
ORNTAC	0.0478455	0.0478455
EX_ptrc_e	0	0
ACOAD3f	-0.00217851	-0.00217851
DMATT	0.000212569	0.000212569
FDHr	11.0017	11.0017
ETMAt_e	0	0
AROGDH	0	0
GTPCI	1.36727e-05	1.36727e-05
SO4tex	0.0105439	0.0105439
LDH_D3	0	0
HSPMDS	0	0
HSPMS	0	0
DCTPD	0.00255411	0.00255411
BIOTINS	3.66878e-05	3.66878e-05
PAPPT3	1.67067e-05	1.67067e-05
COBALT2tex	3.66878e-05	3.66878e-05
PAPPT1	0	0
HISTD	0.0113209	0.0113209
DVPCLPHVR	0	0
UQCYOR_2p	0	1.13344
EX_galcDaraba_e	0	0
EX_arab_L_e	0	0
ACOAD1f	-0.00217851	0.014141
SULR	0.0098639	0.0098639
G1PACT	0.0056116	0.0056116
DMQMT2	3.66878e-05	3.66878e-05
ANS	0.00010091	0.00010091
MSUCCCOADH	1.59367	1.59367
NTPP7	0	1.11842e-13
NIGOSH	0	0
NTPP8	0	1.11842e-13
ACOAD6f	-0.00217851	-0.00217851
NTPP3	0	0
NTPP4	0	1.11842e-13
UAGCVT	1.67067e-05	1.67067e-05
CU2tex	0.00055132	0.00055132
NTPP5	0	1.11842e-13
NTPP6	0	1.11842e-13
HFACOAE120	0	0
EAR121y	0.0185179	0.0185179
ALAALAr	1.67067e-05	1.67067e-05
FALDtex	0	0
ECOAH181	0	0
GLYKr	0	0
EX_mn2_e	-0.00055132	-0.00055132
DGK1	0	1.11842e-13
ACOAD7f	-0.00217851	-0.00217851
3OAS180	0	2.23684e-13
3OAS181	0.0174005	0.0174005
NAPRTr	-3.66878e-05	-3.66878e-05
NADH11	12.8473	12.8473
HACYLCOAEPI40	0	3.19164
FACOAE120	0	1.11842e-13
DHAtex	0	0
PNTK	3.66878e-05	3.66878e-05
PHOTOSYS1C	0	2.23684e-13
OMPDC	0.0293267	0.0293267
H2O2tex	0	0
SERTRS	0.0518074	0.0518074
Kt3pp	0	1.78947e-13
ACOAD4f	-0.00217851	-0.00217851
CO2DAMR	3.66878e-05	3.66878e-05
AMMQT8_2	0	0
CO2DAMS	0	0
CYOD	0	2.23684e-13
EX_glu_L_e	0	0
HFACOAE100	0	0
EX_DM_oxEA	0	0
GRTT	0.000212569	0.000212569
THDPS	0.043043	0.043043
PRPPS	0.0871513	0.0871513
EAR180y	0	2.23684e-13
DAPDC	0.0430263	0.0430263
CREAH	0	0
EX_zn2_e	-0.00055132	-0.00055132
A5PISO	-3.34133e-05	-3.34133e-05
KAS14	0.0186014	0.0186014
SHCHF	3.66878e-05	3.66878e-05
ACOAD5f	-0.00217851	-0.00217851
CS	0.192178	0.192178
MDH	-0.719057	-0.719057
PROTRS	0.051931	0.051931
BPNT	0.0098639	0.0098639
HACYLCOAEPI60	0	0
3OAS60	0.0186014	0.0186014
ECOAH161	0	0
FACOAE100	0	1.11842e-13
NFORGLUAH	0	0
TDPDRR	0.101946	0.101946
EX_mal_L_e	0	0
HFACOAE160	0	0
ACACtex	0	0
TDPDRE	0.101946	0.101946
ARBtex	0	0
MTHFR3	0.0100868	0.0100868
OMCDC	0.0663171	0.0663171
EX_cit_e	0	0
DPGM	0	0
GLYD	4.02669	4.02669
O2tpp	8.03262	8.03262
MEOHtex	0	0
ACCOACr	0.147583	0.147583
EX_glcn_e	0	0
DHAD2	0.0348451	0.0348451
GLYOX	0	0
DHAD1	0.136527	0.136527
DASYN160	0.000554296	0.000554296
3OAS140	6.68266e-05	6.68266e-05
BTS6	3.66878e-05	3.66878e-05
3OAS141	0.0185179	0.0185179
DASYN161	0.000558687	0.000558687
NH4tex	1.63425	1.92838
MALCOAL	2.43301	2.43301
ECOAH141	0	0
SULFOX2	0	4.47368e-14
3OAS80	0.0186014	0.0186014
EX_tartr_L_e	0	0
MALCOAS	2.43301	2.43301
EX_2driboa_e	0	0
OCTDPS2	3.66878e-05	3.66878e-05
PRAGSr	0.0451088	0.0451088
MPTSS	3.66878e-05	3.66878e-05
MPTSP	3.66878e-05	3.66878e-05
HFACOAE140	0	0
UDPGCGT	0	0
EX_DM_trnaser	-0.0518074	-0.0518074
UAGPT3	1.67067e-05	1.67067e-05
FT	1.00841e-05	1.00841e-05
ACOAD8f	-0.00106992	-0.00106992
EX_cobalt2_e	-3.66878e-05	-3.66878e-05
LPADSS	1.67067e-05	1.67067e-05
GLYO1	0	5.5921e-14
DHDPS	0.043043	0.043043
GLCNtex	0	0
GLUR	0.184408	0.184408
GK1	0.020304	0.020304
MCOATA	0.14751	0.14751
CELLS	0.0579237	0.0579237
EX_mma_e	0	0
EAR120y	8.35333e-05	8.35333e-05
ASPTRS_tASN	0.0417182	0.0417182
SDACT	0.000110063	0.000110063
SPMDAT1	0	0
SUCCtex	0	0
EX_DM_trnamet	-0.00940735	-0.00940735
OHPBAT	3.66878e-05	3.66878e-05
DASYN180	0.00053496	0.00053496
ZNabcpp	0.00055132	0.00055132
NTPP1	0	1.11842e-13
NTPP2	0	1.11842e-13
DASYN181	0.00870024	0.00870024
GALCDARABAtex	0	0
RBFSa	0.000183439	0.000183439
3OAS160	0	4.47368e-14
3OAS161	0.0185179	0.0185179
EAR100y	8.35333e-05	8.35333e-05
RBFSb	9.17196e-05	9.17196e-05
ECOAH121	0	0
DADK	0	1.11842e-13
Biomass_Mextorquens_AM1_core	0.167067	0.167067
EX_ch4_e	-14.9	-14.9
CH4tex	14.9	14.9
PMMOipp	14.9	14.9
PMMODCipp	0	0
ALDD1	0	0
N2trpp	0	0
N2tex	0	0
EX_n2_e	0	0
EX_no2_e	-4.26065e-14	0.294134
NO2tex	-0.294134	0
SAMMOi	0	1.49123e-13
NO3t7pp	0	0
NO3R1	0	0
NTRIR2x	0	4.26065e-14
PAMMOipp	0	0.294134
HAMtpp	-1.49123e-13	8.94736e-14
NO2tpp	0	4.26065e-14
NORZ2	0	0
NIT_mc	0	0
SMMOi	0	0
CH4trpp	0	0
ANHMK	0	0
METSOXR2	0	0
NADPHQR2	0	2.23684e-13
QRr	0	2.23684e-13
UACMAMO	0	0
NDPK6	0	0
NDPK9	0	0
NDPK10	0	0
LIPOS	0	0
GTHRDHpp	0	0
PPS	0	2.23684e-13
ORNTA	0	2.23684e-13
CLPNS160	0	0
CLPNS161	0	0
CLPNS180	0	0
CLPNS181	0	0
SHSL2	0	0
XPPT	0	0
MSAR	0	0
BACCL	0	0
HGNTOR	0	0
34HPPOR	0	0
FTHFCL	0	0
CPPPGO2	0	0
GLUDy	0	2.23684e-13
GLUDxi	0	2.23684e-13
UDPGDC	0	0
HCITS	0	0
TRPAS2	0	1.11842e-13
NTPTP1	0	0
HOPNTAL	0	0
CCGS	0	0
DAAD	0	0
HMGL	0	0
HEX7	0	0
LIPOCT	0	0
PFK_ppi	-0.30025	1.4406
PFK	0	0
SQLC	0	0
SQLC2	0	0
ACM6PH	0	0
CHOLD	0	0
TMDS3	0.00255411	0.00255411
OXADC	0	0
METGL	0	0
UREA	0	0
SCYSDS	0	0
MOCDS	0	0
MCITD	0	0
NMNS	0	0
DHCYTCPEROX	0	4.47368e-13
PPK2	0	2.23684e-13
HAMR	0	8.94736e-14
HAORipp	0	0.294134
ACSPW	1.21651	1.21651
PC	0	1.28513
LYSDC	0	5.21712e-15
CADVt	0	0
DM_lys_L_e	0	0
EX_15dap_e	0	0
DM_15dap_c	0	5.21712e-15

## Sheet: FVA in NMS medium
	minimum	maximum
EAOXRED	9.47482e-05	9.47482e-05
IMPC	0.0413847	0.0413847
HACD8i	-0.000785174	1.24084
PANTS	2.69238e-05	2.69238e-05
IMPD	0.0148734	0.0148734
OCPPH3	2.69238e-05	2.69238e-05
PGSA161	0.000122996	0.000122996
LCAD	0	0
PGSA160	0.000122035	0.000122035
PPAtex	0	0
DTMPK	0.00187437	3.7192
PPND	0.00928167	0.00928167
DXPRIi	0.000756559	0.000756559
PC11M	2.69238e-05	2.69238e-05
PSERTr	0	3.93871
CAT	0	0.0111953
CYO_2p	14.8776	14.9
UAMAS	1.22604e-05	1.22604e-05
MNEUROPNDH3	4.73741e-05	4.73741e-05
EX_DM_trnathr	-0.0377191	-0.0377191
MNEUROPNDH2	4.73741e-05	4.73741e-05
2AGPEAT161acp	0	0
PEPGLYCANGT	1.22604e-05	1.22604e-05
MTHFC	2.34019	4.88084
MTHFD	2.34019	4.88084
THRD_L	0.0255715	0.0255715
EAR60y	0.0136509	0.479367
CDPMEK	0.000756559	0.000756559
PGMT	-0.121677	-0.121677
PGSA181	0.00191544	0.00191544
PItex	0.0857284	0.0857284
ASPCTr	0.0215217	0.0215217
MALtex	0	0
CYTK1	0.00840214	3.72573
SUCCOAH	0	8.28747
HNEUROPNMT2	0	0
2AGPEAT180acp	0	0
HNEUROPNMT3	0	0
HNEUROPNMT4	0	0
DHPPDA2	6.73095e-05	6.73095e-05
PGSA180	0.000117778	0.000117778
CITtex	0	0
PHYNDH_e	0	0
HNEUROPNMT6	4.73741e-05	4.73741e-05
HNEUROPNMT5	4.73741e-05	4.73741e-05
GLYCL_3	0	0
EX_ac_e	0	0
EX_etma_e	0	0
EDTXS1	1.22604e-05	1.22604e-05
PRE3BS	2.69238e-05	2.69238e-05
HACD1	-17.8882	0
HACD2	-0.00159873	0.464117
HACD5	-0.00159873	0.464117
HACD6	-0.00159873	0.464117
HACD3	-0.00159873	0.464117
MTRI2	0	0
HACD4	-0.00159873	0.464117
ARGTRS	0.0295487	0.0295487
AACPS3	0	3.71853
AACPS4	0	3.71733
SHK3Dr	-0.0260619	-0.0260619
AACPS5	0	3.71733
AACPS6	0	3.71811
IGPS	7.40539e-05	7.40539e-05
EX_h2o_e	26.4282	26.4282
GLYCLTDx	-1.00339e-05	-1.00339e-05
SULabcpp	0.00773774	0.00773774
HACD7	-0.00159873	0.464117
SHCHD2	2.69238e-05	2.69238e-05
RIBONAtex	0	0
ADK1	0.893319	8.32957
PC6YM	2.69238e-05	2.69238e-05
EX_pyr_e	0	0
SALMMT	0	0
GFUCS	0	0
GMPS	-7.43466	0
POLYPIP	0	0
DNTPPA	1.00339e-05	1.00339e-05
MALTATr	0	0
ACACt2pp	0	0
PYRtex	0	0
GLUTRS	0.0337504	0.0337504
ATPM	3.5	3.5
FE2tex	0.000984361	0.000984361
GLXDH	0	0
MOBDMPTL	2.69238e-05	2.69238e-05
HACYLCOAEPI100	0	0
DB4PS	0.000134619	0.000134619
LEUTRS	0.0486676	0.0486676
GLUPRT	0.0331037	0.0331037
HNEUROPNMT	0	0
PTPAT	2.69238e-05	2.47825
DDPA	0.0260619	0.0260619
ASPtex	0	0
FBA	0.220342	0.220342
HEXTT	2.69238e-05	2.69238e-05
RIBtex	0	0
AKGDH	0	1.67542
LYXtex	0	0
EAR181y	0.0127696	0.0127696
2KDRIBtex	0	0
ALATRS	0.135281	0.135281
PC17M	2.69238e-05	2.69238e-05
HSERTA	0.00695754	0.00695754
TKT1	0.0320581	0.0320581
LPLIPAL2C161	0	0
CCR	0	7.44663
PHETRS	0.0166692	0.0166692
P5CR	0.0381102	7.48474
EX_5dglcn_e	0	0
ACACT7r	-0.00159873	0.464117
ACACT5r	-0.00159873	0.464117
P5CD	0	7.43466
ETFDH	0.723157	1.58839
PYAM5POr	0	0
LYSTRS	0.0315754	0.0315754
EAR141y	0.0135895	0.0135895
UDPGLCUREPI	0	0
PC8XM	2.69238e-05	2.69238e-05
ACACT6r	-0.00159873	0.464117
FBP	0	8.7122
DALAOX	0	8.78994e-14
EX_for_e	0	0
KAT8	-0.000785174	1.24084
DHAtpp	0	0
EAR140y	0	0.465716
ADCPS2	2.69238e-05	2.69238e-05
LPLIPAL2C181	0	0
EAR80y	0.0136509	0.479367
LPLIPAL2C180	0	0
EX_h_e	-13.1749	-2.12496
MOBDabcpp	0.000431516	0.000431516
DHORD	0.0215217	0.0215217
EAR160y	0	0.465716
PEMT181	0	0
PEMT180	0	0
SOTA	0	0
APRAUR	6.73095e-05	6.73095e-05
CA2tex	0.00110589	0.00110589
ACACT4r	-0.00159873	0.464117
AICART	0.0413847	0.0413847
NADS1	-7.43466	0
HACYLCOAEPI140	0	0
NADS2	0.000841876	7.4355
HPPK2	1.00339e-05	1.00339e-05
COBALT2tpp	2.69238e-05	2.69238e-05
RNDR3	0.00595082	0.00595082
ENCOAI81	0	0
RNDR2	0.00407645	0.00407645
UAGDP	0.00411814	0.00411814
PDX5PS2	2.69238e-05	2.69238e-05
RNDR1	0.00187437	0.00187437
AKGtex	0	0
PUNP8	0	0
L_LALDtex	0	0
PUNP9	8.07714e-05	8.07714e-05
L_LACt2rpp	0	0
EAR40y	0.0136509	0.479367
ALAGLUEPI	0	0
GPDDA1	0	0
GPDDA2	0	0
DAHETBCLPHDDH	0	0
PUNP7	0	0
EX_DM_trnaala	-0.135281	-0.135281
GLNTRAT	0.0340103	0.0340103
ACACT3r	-0.00159873	0.464117
EX_DM_trnaile	-0.0255715	-0.0255715
EX_photon_e	0	0
DCAtex	0	0
3HBCDH	0	17.8882
GCALDDr	1.00339e-05	1.00339e-05
ACACT2r	-0.00159873	0.464117
PPNDH	0.0166692	0.0166692
EX_xylnt_D_e	0	0
FPGS8	0	0
ACtex	0	0
AHC	0.000444757	0.000444757
ALATA_D	0.135318	0.135318
ZCARDS2	4.73741e-05	4.73741e-05
ADSK	0.00723874	0.00723874
GTPCII2	6.73095e-05	6.73095e-05
HACYLCOAEPI120	0	0
LYXNTtex	0	0
ENCOAI61	0	0
TDSK	1.22604e-05	1.22604e-05
APG3PAT160	0.000406777	0.000406777
ACALDtpp	0	0
APG3PAT161	0.000409999	0.000409999
ADSS	0.0265113	0.0265113
FACOAL60	0	3.71733
EX_DM_AMOB	2.69238e-05	2.69238e-05
ACACT1r	0.523435	1.62399
GLUTRS_Gln_	0.0340103	0.0340103
CYOO_4p	0	6.10402e-14
MEOHDH	14.9	14.9
PHYNS	4.73741e-05	4.73741e-05
CDPGD	0	0
G2PP	0	0
TRPS1r	0	3.7174
OPHBDC	2.69238e-05	2.69238e-05
ENCOAI41	0	0
TSULtex	0	0
SORBNLDH	0	0
APG3PAT180	0.000392587	0.000392587
APG3PAT181	0.00638478	0.00638478
APH181	0	3.71733
ACPpds	0	2.47822
EX_rib_D_e	0	0
CHORS	0.0260619	0.0260619
APH180	0	3.71733
CHORM	0.0259509	0.0259509
SUCOAS	0	9.91287
FACOAL80	0	3.71733
5DGLCNR	0	0
PPDK	0	7.43466
BTCAL	0	0
H2MB4PRD	0.000155996	0.000155996
GTHS	2.69238e-05	2.69238e-05
XYLNTtex	0	0
APH161	0	3.71733
TRPS3r	-3.71733	7.40539e-05
ADPT	8.07714e-05	8.07714e-05
EX_DM_trnatrp	-7.40539e-05	-7.40539e-05
CATetoh	0	0
ACS	0	2.30873
MREDR	0	0
PPPGO	5.38476e-05	5.38476e-05
USHD	1.22604e-05	1.22604e-05
ZCARDS	4.73741e-05	4.73741e-05
EX_ca2_e	-0.000606889	-0.000606889
APH160	0	3.71733
UAGAAT	2.45208e-05	2.45208e-05
CA2abctpp	0.00110589	0.00110589
HSTPTr	0.008308	0.008308
ZCARDS2_e	0	0
EX_lald_L_e_	0	0
TRPTRS	7.40539e-05	7.40539e-05
PROD2	0	7.44663
DHORTS	0.0215217	0.0215217
MOGDS	2.69238e-05	2.69238e-05
EAR161y	0.0135895	0.0135895
CYSTRS	0.000119654	0.000119654
3HAD121	0.0135895	0.0135895
3HAD120	6.13019e-05	0.465777
IPMD2r	0.0486676	0.0486676
FCLPA	0	0
EX_dca_e	0	0
COCHL	2.69238e-05	2.69238e-05
CPPPGO	5.38476e-05	5.38476e-05
EX_galcDarab_e	0	0
HISTDADH	0.008308	0.008308
EX_tsul_e	0	0
ASPTA	-2.61521	-0.274385
KAT141	0	0
TARTRtex	0	0
PSD161	0.000278801	0.000278801
GLU5K	0	7.47277
PSD160	0.000276606	0.000276606
TARTR_Ltpp	0	0
DXPS	0.000783482	0.000783482
FACOAL121	0	0
FACOAL120	0	3.71733
VALTRS	0.0514973	0.0514973
EX_D_araba_e	0	0
PHAS	0.0340078	11.084
EX_mg2_e	-0.00101148	-0.00101148
SUCCD1	0.722296	3.26294
MEPCT	0.000756559	0.000756559
EX_lac_L_e	0	0
METAT	0.000579376	0.000579376
ETOHtex	0	0
3HAD100	0.0136509	0.479367
FRDOr	0.000756559	7.43541
THRTRS	0.0377191	0.0377191
EX_co2_e	9.97384	9.97384
TMPPP	2.69238e-05	2.69238e-05
KAT121	0	0
HACDHG	0	0
PRMICI	0.008308	0.008308
EX_araba_e	0	0
VALTA	0.0514973	0.0514973
FCLT	5.38476e-05	5.38476e-05
PRFGS	0.0331037	0.0331037
MFPGS5	0	0
TYRTA	0.00928167	0.00928167
T2DECAI	0.0135895	0.0135895
THMBIOS2	2.69238e-05	2.69238e-05
THMBIOS3	2.69238e-05	2.69238e-05
THMBIOS4	2.69238e-05	2.69238e-05
PPCDC	2.69238e-05	2.69238e-05
FACOAL100	0	3.71733
PPA2	2.69238e-05	7.43468
RPI	-0.0318989	-0.0318989
DHXANTI	0	0
EX_DM_trnaphe	-0.0166692	-0.0166692
ORPT	0.0215217	0.0215217
DHXANTH	0	0
GMPS2	0.0148734	7.44953
PYK	-9.66404	6.18988
RPE	-0.0320581	-0.0320581
PTA2	0	0
ASAD	0.101863	2.44269
ACPS1	0	2.47822
FMNRx2	-4.03857e-05	-4.03857e-05
HACOAEPI141	0	0
BMMALCOAL	0.723157	1.58839
EX_DM_thif	0	0
PRAMPC	0.008308	0.008308
FUM	0.811433	3.35208
EX_fe2_e	-0.000984361	-0.000984361
EX_acac_e	0	0
EX_DM_thil	0	0
KAT181	0	0
HGBAMS	2.69238e-05	2.69238e-05
DHDPRy	0.0315876	0.0315876
EX_DM_trnagln	-0.0340103	-0.0340103
BRFAPS	0	0
EX_DM_this	0	0
EX_ppa_e	0	0
LPLIPAL1E181	0	0
LEUTAi	0.0486676	0.0486676
EX_DM_trnaglu	-0.0337504	-0.0337504
ACONT	0.141032	1.81645
EX_DM_trnagly	-0.143753	-0.143753
FPGS10	0	0
ENCOAI162	0	0
FACOAL161	0	0
ENCOAI161	0	0
FACOAL160	0	3.71733
NNDMBRT	2.69238e-05	2.69238e-05
ALAR	-0.135293	-0.135293
ALAS	0.000861561	0.000861561
ORNDC	0.00556327	0.00556327
NADK	0.000299403	0.000299403
EX_cu2_e	-0.000404592	-0.000404592
DBTSr	2.69238e-05	2.69238e-05
GLUtex	0	0
HACOAEPI121	0	0
GAPD	-0.452108	-0.452108
CU2abcpp	0	3.71733
KDOPS	2.45208e-05	2.45208e-05
GLYAMDTRc	0	0
UPP3S	0.000107695	0.000107695
UPP3MT	5.38476e-05	5.38476e-05
KDOPP	2.45208e-05	2.45208e-05
THD2pp	0	13.4162
EX_so4_e	-0.00773774	-0.00773774
ETHMALCOAM	0.723157	1.58839
LPLIPAL1E160	0	0
LPLIPAL1E161	0	0
KAT161	0	0
HSK	0.0633174	2.40414
EX_glyclt_e	0	0
MLMPTDHy	0	14.9
PHBD2	0	11.05
ENCOAI182	0	0
FACOAL141	0	0
ENCOAI181	0	0
FRTT	0.000121672	0.000121672
FACOAL140	0	3.71733
ASP1DC	2.69238e-05	2.69238e-05
DHQS	0.0260619	0.0260619
CBPS	0.0510705	0.0510705
LDH_L	0	0
ETHAtex	0	0
THZS	2.69238e-05	2.69238e-05
DNMPPA	1.00339e-05	1.00339e-05
EX_mobd_e	-0.000431516	-0.000431516
DHQD	0.0260619	0.0260619
CLt4	0.000606889	0.000606889
GLYTRS	0.143753	0.143753
Kabcpp	0.0226167	5.97034
PPAt7	0	0
MALDHDC	0	7.43466
HNEUROPNS2	4.73741e-05	4.73741e-05
EX_dha_e	0	0
HNEUROPNS1	4.73741e-05	4.73741e-05
ACPPAT181	0.00638478	3.72371
UAAGDS	1.22604e-05	1.22604e-05
SDPDS	0.0315876	0.0315876
HACOAEPI181	0	0
MCPST	0	0
ACPPAT180	0.000392587	3.71772
AIRCr	0.0330767	0.0330767
IG3PS	0.008308	0.008308
MOBDtex	0.000431516	0.000431516
GLYCLTtex	0	0
ACOTA	-3.77149	-0.035112
TMDS	0	0
PRAIS	0.0331037	0.0331037
ANACMURLALAA	0	0
UPPDC1	5.38476e-05	5.38476e-05
ARABA_Dtex	0	0
EX_arab_D_e	0	0
SPOTN	2.69238e-05	2.69238e-05
3OAR40	0.0136509	0.479367
XYLtex	0	0
SSALyr	0	0
UDPGDr	0	0
DTPCUDCPPP	1.22604e-05	1.22604e-05
PPC	0	8.37776
PPA	0	8.7122
BTCOAC	0	7.43466
3HAD181	0.0127696	0.0127696
PPDODH	0	0
3HAD180	0	1.24163
ACPPAT161	0.000409999	3.71774
ACPPAT160	0.000406777	3.71773
HACOAEPI161	0	0
MLMPTDH	0	14.9
PRAI	7.40539e-05	7.40539e-05
CBLAT	0	0
DPCOAK	2.69238e-05	2.47825
FTHFL	2.41468	4.95533
EX_akg_e	0	0
ILETRS	0.0255715	0.0255715
ASPO6	0.000841876	0.000841876
PRE5MT	2.69238e-05	2.69238e-05
FACOAL180	0	3.71733
FACOAL181	0	0
FALDHp	0	0
TRSARr	0	0
DHOANTC	0	0
PRBK	0	0
LPLIP2AGPC160	0	0
DHFS	1.00339e-05	1.00339e-05
PGPP160	0.000122035	0.000122035
DHFR	1.00339e-05	1.00339e-05
EX_meoh_e	0	0
PGPP161	0.000122996	0.000122996
3HAD160	0	0.465716
3HAD161	0.0135895	0.0135895
LGTHL	0	0
PTAr	-3.13644	-0.0581334
FMFTFMPT	14.9	14.9
PMPK	2.69238e-05	2.69238e-05
GMAND	0	0
G3PD2	0.00987239	0.00987239
12PPDStex	0	0
3OAR80	0.0136509	0.479367
METTRS	0.0069037	0.0069037
TRPS2	0	3.7174
AMAOTr	2.69238e-05	2.69238e-05
FALDA	0	0
ADOCBLPS	0	2.69238e-05
H2MPTR2	4.04592e-05	4.04592e-05
PRATPP	0.008308	0.008308
OMMBZH2	2.69238e-05	2.69238e-05
ADMDCr	0	0
PGPP180	0.000117778	0.000117778
EX_DM_5dr1p	8.07714e-05	8.07714e-05
3HAD140	0	0.465716
PGPP181	0.00191544	0.00191544
TMPKr	2.69238e-05	2.69238e-05
3HAD141	0.0135895	0.0135895
EX_h2o2_e	0	0
EX_asp_L_e	0	0
EX_DM_trnaleu	-0.0486676	-0.0486676
DUTPDP	0.00187437	0.00187437
3PSMES	0.0260619	0.0260619
FMETTRS	0	0
NAtex	0.000498997	0.000498997
MI3PP	0	0
2AGPEAT160acp	0	0
OCOAT1r	0	11.05
ADCMS2	0	0
PSD181	0.00434165	0.00434165
PSD180	0.000266957	0.000266957
3OAR60	0.0136509	0.479367
ADOCBIK	0	0
PERD	2.69238e-05	2.69238e-05
H2MB4P	0.000756559	0.000756559
UDPACGAM	0	0
HACOADH121	0	0
E4PD	2.69238e-05	2.69238e-05
CLtex	0.000606889	0.000606889
KDOCT	2.45208e-05	2.45208e-05
3OAR160	0	0.465716
ADSL1r	0.0265113	0.0265113
3OAR161	0.0135895	0.0135895
PHYNS2	4.73741e-05	4.73741e-05
PGI	0.126032	0.126032
HFACOAE60	0	0
PGK	0.452108	0.452108
GF6PTAr	0.00411814	0.00411814
UAMAGS	1.22604e-05	1.22604e-05
PGM	0.452108	4.39082
MMPTC	14.9	14.9
MG2tex	0.00101148	0.00101148
MPTAT	2.69238e-05	2.69238e-05
FUMtex	0	0
EX_cl_e	-0.000606889	-0.000606889
LPLIP1AGPC160	0	0
PPBNGS	0.000430781	0.000430781
PAPR	0.00723874	0.00723874
PYRt2rpp	0	0
PSP_D	0	0
MALCOATE	0	7.43466
OCMPH2	2.69238e-05	2.69238e-05
PIt2rpp	0	0.0857284
PSP_L	0	3.93871
SPMS	0	0
FACOAE180	0	3.71811
EX_pi_e	-0.0857284	-0.0857284
UGMDDS	1.22604e-05	1.22604e-05
OCBT	0.0295487	0.0295487
MNtex	0.000404592	0.000404592
HEMEOS	2.69238e-05	2.69238e-05
BDH	0	11.05
G5SD	0	7.47277
AGPR	0.035112	3.77149
3OAR140	4.90415e-05	0.465765
3OAR141	0.0135895	0.0135895
EX_ribona_e	0	0
OHPHM	2.69238e-05	2.69238e-05
GALCDARABtex	0	0
O2tex	22.3617	22.3617
ARABAtex	0	0
MAN1PT	0	0
ADSL2r	0.0330767	0.0330767
TALA	-0.0320581	-0.0320581
AGPAT161	0.000409999	0.000409999
3HAD60	0.0136509	0.479367
PGCDr	-2.44249e-15	3.93871
AGPAT160	0.000406777	0.000406777
GTHPp	0	1.02402e-13
FACOAE160	0	3.71853
PDH	0	1.73046
3OAR120	6.13019e-05	0.465777
ILETA	0.0255715	0.0255715
3OAR121	0.0135895	0.0135895
MTAP	0	0
EX_k_e	-0.0226167	-0.0226167
H2Otex	-26.4282	-26.4282
DAPE	0.0315876	0.0315876
ASPK	0.101863	2.44269
EX_DM_h2mpt	-4.04592e-05	-4.04592e-05
NO3tex	1.19931	1.19931
EX_xyl_D_e	0	0
HMPK1	0	0
Htex	2.12496	13.1749
PDX5PO	2.69238e-05	2.69238e-05
UPP3MT2	5.38476e-05	5.38476e-05
FORtex	0	0
GTHOr	0	5.0584e-13
ACS2	0	0
AGPAT180	0.000392587	0.000392587
G5SADr	0.0381102	7.47277
AGPAT181	0.00638478	0.00638478
EX_etoh_e	0	0
UAPGR	1.22604e-05	1.22604e-05
NDPK8	0.00187437	3.7192
NDPK7	0.00595082	0.00595082
ATPS4rpp	22.0202	32.0069
3HAD80	0.0136509	0.479367
NDPK5	0.00407645	3.7214
NDPK4	0.0766884	3.79402
NDPK3	0.00245132	3.71978
FACOAE140	0	3.71733
NDPK2	0.072503	3.78983
NDPK1	0.0373352	3.75466
CA2NAtpp	0.000498997	0.000498997
METACH	0.00695754	0.00695754
GGTT	2.69238e-05	2.69238e-05
ANPRT	7.40539e-05	7.40539e-05
AKGt2rpp	0	0
EX_12ppd_S_e	0	0
HFACOAE80	0	0
3OAR100	0.0136509	0.479367
MECDPS	0.000756559	0.000756559
GLNS	1.22575	8.6604
F6PPKL	0.0581334	0.0581334
Zn2tex	0.000404592	0.000404592
MG2uabcpp	0.00101148	0.00101148
ACOATA	0.0136509	0.479367
EX_fald_e	0	0
EX_nh4_e	0	0
MOHMT	2.69238e-05	2.69238e-05
CMBLD2	0	0
5DGLCNtex	0	0
AGDC_r	0	0
HCO3E	0.882507	9.70984
CMBLD4	0	0
CMBLD3	0	0
OXAFORtpp	0	0
EX_na1_e	-0.000498997	-0.000498997
EX_oxa_e	0	0
PHYNDH2	4.73741e-05	4.73741e-05
QULNS	0.000841876	0.000841876
GLUCYS	2.69238e-05	2.69238e-05
EX_glc_e	0	0
IGPDH	0.008308	0.008308
ICDHyr	0.141032	1.81645
MACACI	0	0
FORMMFRHD	14.9	14.9
R3HAD40	0.0136509	0.479367
ENCOAI141	0	0
ENCOAI142	0	0
ACGLCAM	0	0
ARGSSr	0.0295487	0.0295487
FACOAE60	0	3.71733
ACOAD161	0	0
UMPK	0.0215463	3.73887
PRASCS	0.0330767	0.0330767
ASNS1	0	0
SDPTA	0.0315876	0.0315876
TPI	0.231056	0.231056
PSSA181	0.00446934	0.00446934
PSSA180	0.000274809	0.000274809
NH4tpp	0	0
TRE6PP	0.00435513	0.00435513
TRE6PS	0.00435513	0.00435513
THRPD	2.69238e-05	2.69238e-05
ACBIPGT	2.69238e-05	2.69238e-05
MAN6PI	0	0
THRPS	2.69238e-05	2.69238e-05
MESACOAH	0.723157	1.58839
LPLIPAL1C180	0	0
ADCYRS	2.69238e-05	2.69238e-05
LPLIPAL1C181	0	0
EX_DM_trnacys	-0.000119654	-0.000119654
EX_no3_e	-1.19931	-1.19931
ETOHDH	0	0
ARGSL	0.0295487	0.0295487
PTHPS	0	0
ENCOAI121	0	0
ASPTRNAAMT	0.0306154	0.0306154
EX_o2_e	-22.3617	-22.3617
ACODA	0	2.51433
ENCOAI122	0	0
RZ5PP	0	2.69238e-05
ASPTRS	0.03038	0.03038
NNAMr	0	0
UDPG4E	0	0
ACGS	0	2.51433
ACOAD181	0	0
Ktex	0.0226167	0.0226167
HACOADH181	0	0
HACOADH180	0	0
HTHRPD	2.69238e-05	2.69238e-05
ACGK	0.035112	3.77149
FACOAE80	0	3.71733
CMPKDOT2	1.22604e-05	1.22604e-05
CMPKDOT1	1.22604e-05	1.22604e-05
HEMEDS2	2.69238e-05	2.69238e-05
SPODM	0	0
PSSA161	0.000287003	0.000287003
PSSA160	0.000284742	0.000284742
GLYCOX3	0	0
GLYCOX4	0	0
OXAtex	0	0
PPNCL2	2.69238e-05	2.69238e-05
GLYCOX5	2.69238e-05	2.69238e-05
UHGADA	2.45208e-05	2.45208e-05
THRS	0.0633174	2.40414
BB_RMN	0.0748141	0.0748141
METSr	0.0074023	0.0074023
EX_DM_trnahis	-0.008308	-0.008308
THRA	-8.97253e-15	2.34082
LPLIPAL1C161	0	0
HMBS	0.000107695	0.000107695
CYSTL	0	0
CYSSr	0.000200425	0.000200425
ACOAD121	0	0
CBIAT	0	0
FMNAT	2.69238e-05	2.69238e-05
ENCOAI101	0	0
PGLYCP	0	0
KARA2	0.0255715	0.0255715
HACOADH160	0	0
HACOADH161	0	0
DHPS2	1.00339e-05	1.00339e-05
SADT	0.00723874	0.00723874
PC20M	2.69238e-05	2.69238e-05
KARA1	0.100192	0.100192
2DRIBOAtex	0	0
IPPMIb	0.0486676	0.0486676
G1PTT	0.0748141	0.0748141
SKMK	0.0260619	0.0260619
EX_fum_e	0	0
PC6AR	2.69238e-05	2.69238e-05
3OAR181	0.0127696	0.0127696
GLYCK2	0.723168	5.04931
H2O2tpp	-0.0223905	0
H2MB4PRD2	0.000600562	0.000600562
EX_DM_trnapro	-0.0381102	-0.0381102
U23GAAT	2.45208e-05	2.45208e-05
THMBTHIC	2.69238e-05	2.69238e-05
ACOAD141	0	0
DPR	2.69238e-05	2.69238e-05
SERGLXAT	0.723168	5.04931
EX_2kdrib_e	0	0
3OAR180	0	1.24163
HACOADH141	0	0
5DGLCNt2rpp	0	0
MPTFALDA	14.9	14.9
3HBCD	-11.084	1.58998
PMDPHT	6.73095e-05	6.73095e-05
CO2tex	-9.97384	-9.97384
NTD10	0	0
NTD11	0	0
EX_lyxnt_e	0	0
ACKr	0	3.0783
ACLS	0.100192	0.100192
FALDtpp	14.9	14.9
HSDyi	0.070275	2.4111
ATPPRTr	0.008308	0.008308
NNDPR	0.000841876	0.000841876
NO3Ras	0	0
EX_DM_trnaarg	-0.0295487	-0.0295487
PPTT	2.69238e-05	2.69238e-05
PTRCtex	0	0
GLUSy	0.998839	4.73522
LPLIPAL2E180	0	0
EX_succ_e	0	0
LPLIPAL2E181	0	0
PIuabcpp	0	0.0857284
THMBIOS	2.69238e-05	2.69238e-05
FE2t2pp	0	0.000984361
NNATr	0.000841876	0.000841876
EX_DM_trnalys	-0.0315754	-0.0315754
ARAB_Dtex	0	0
ALDD2y	0	2.34082
HPTRED	0	0
PHYNDH2_e	0	0
MPTSA	5.38476e-05	5.38476e-05
TRDR	0.0191404	0.0191404
FE2abcpp	0	0.000984361
ZCARDS_e	0	0
3OAS100	0.0136509	0.479367
PGAMT	-0.00411814	-0.00411814
OMBZLM	2.69238e-05	2.69238e-05
ETHMALCOAEPM	0.723157	1.58839
RBFK	6.73095e-05	6.73095e-05
MNt2pp	0.000404592	0.000404592
HBZOPT	2.69238e-05	2.69238e-05
LPLIPAL2E160	0	0
DHNPA2	1.00339e-05	1.00339e-05
LPLIPAL2E161	0	0
PHYNDH	4.73741e-05	4.73741e-05
EX_DM_trnatyr	-0.00925475	-0.00925475
EX_lyx_L_e	0	0
CHRPL	2.69238e-05	2.69238e-05
SERAT	0.000200425	0.000200425
PPCOAC	0.723157	1.58839
H2O2syn	0	4.833e-13
TYRTRS	0.00925475	0.00925475
2AGPEAT181acp	0	0
PMANM	0	0
NTD9	0	0
HFACOAE180	0	0
NTD7	-0.000444757	-0.000444757
EX_DM_rbrdxOX	0	0
L_LACtex	0	0
UDPDPS5	7.40036e-06	7.40036e-06
UDPDPS6	7.40036e-06	7.40036e-06
UDPDPS3	7.40036e-06	7.40036e-06
ENO	-1.60317	4.37582
UDPDPS4	7.40036e-06	7.40036e-06
MME	0.723157	1.58839
CYRDAAT	2.69238e-05	2.69238e-05
H2Otpp	-11.5282	-11.4834
UDPDPS9	7.40036e-06	7.40036e-06
UDPDPS7	7.40036e-06	7.40036e-06
GHMT2r	2.33089	4.87153
UDPDPS8	7.40036e-06	7.40036e-06
3OAS121	0.0135895	0.0135895
3OAS120	6.13019e-05	0.465777
MMM2r	0.723157	1.58839
AACOAR	0	12.2551
ADOCBLPPA	0	2.69238e-05
ECOAH5	-0.00159873	0.464117
ECOAH6	-0.00159873	0.464117
BB_ACGAM	0.0040691	0.0040691
ECOAH3	-0.00159873	0.464117
ECOAH4	-0.00159873	0.464117
AOXSr	2.69238e-05	2.69238e-05
GARFT	0.0331037	0.0331037
ECOAH7	-0.00159873	0.464117
COBS2	0	2.69238e-05
ECOAH8	-0.000785174	1.24084
EX_DM_trnaasn	-0.0306154	-0.0306154
ECOAH1	0	12.2551
ECOAH2	-0.00159873	0.464117
EX_DM_trnaasp	-0.03038	-0.03038
CO2tpp	-9.97384	-9.97384
FMNDESTRUC	1.34619e-05	1.34619e-05
TDPGDH	0.0748141	0.0748141
PHETA1	0.0166692	0.0166692
HISTP	0.008308	0.008308
ADCS	1.00339e-05	1.00339e-05
GALU	0.0468631	0.0468631
CCRC	-6.26512	1.58839
IPPS2	0.0486676	0.0486676
HISTRS	0.008308	0.008308
ACOAD2f	-0.00159873	0.464117
CU2abctpp	0.000404592	3.71773
MMAtex	0	0
PEMT160	0	0
HACYLCOAEPI80	0	0
ADCL	1.00339e-05	1.00339e-05
PEMT161	0	0
EX_etha_e	0	0
CTPS2	0.0166166	0.0166166
ACHBS	0.0255715	0.0255715
ORNTAC	0	3.77149
EX_ptrc_e	0	0
ACOAD3f	-0.00159873	0.464117
DMATT	0.000155996	0.000155996
FDHr	9.94489	12.4855
ETMAt_e	0	0
AROGDH	0	0
GTPCI	1.00339e-05	1.00339e-05
SO4tex	0.00773774	0.00773774
LDH_D3	0	0
HSPMDS	0	0
HSPMS	0	0
DCTPD	0.00187437	0.00187437
BIOTINS	2.69238e-05	2.69238e-05
PAPPT3	1.22604e-05	1.22604e-05
COBALT2tex	2.69238e-05	2.69238e-05
PAPPT1	0	0
HISTD	0.008308	0.008308
DVPCLPHVR	0	0
UQCYOR_2p	0	8.62872e-13
EX_galcDaraba_e	0	0
EX_arab_L_e	0	0
ACOAD1f	-7.43625	0.0103775
SULR	0.00723874	0.00723874
G1PACT	0.00411814	0.00411814
DMQMT2	2.69238e-05	2.69238e-05
ANS	7.40539e-05	7.40539e-05
MSUCCCOADH	0.723157	1.58839
NTPP7	0	3.71733
NIGOSH	0	0
NTPP8	0	3.71733
ACOAD6f	-0.00159873	0.464117
NTPP3	0	0
NTPP4	0	3.71733
UAGCVT	1.22604e-05	1.22604e-05
CU2tex	0.000404592	0.000404592
NTPP5	0	3.71733
NTPP6	0	3.71733
HFACOAE120	0	0
EAR121y	0.0135895	0.0135895
ALAALAr	1.22604e-05	1.22604e-05
FALDtex	0	0
ECOAH181	0	0
GLYKr	0	0
EX_mn2_e	-0.000404592	-0.000404592
DGK1	0	3.71733
ACOAD7f	-0.00159873	0.464117
3OAS180	0	1.24163
3OAS181	0.0127696	0.0127696
NAPRTr	-2.69238e-05	-2.69238e-05
NADH11	6.32646	14.6539
HACYLCOAEPI40	0	12.2551
FACOAE120	0	3.71733
DHAtex	0	0
PNTK	2.69238e-05	2.69238e-05
PHOTOSYS1C	0	7.43466
OMPDC	0.0215217	0.0215217
H2O2tex	0	0
SERTRS	0.0380194	0.0380194
Kt3pp	0	5.94772
ACOAD4f	-0.00159873	0.464117
CO2DAMR	2.69238e-05	2.69238e-05
AMMQT8_2	0	0
CO2DAMS	0	0
CYOD	0	2.22803e-13
EX_glu_L_e	0	0
HFACOAE100	0	0
EX_DM_oxEA	0	0
GRTT	0.000155996	0.000155996
THDPS	0.0315876	0.0315876
PRPPS	0.063957	0.063957
EAR180y	0	1.24163
DAPDC	0.0315754	0.0315754
CREAH	0	0
EX_zn2_e	-0.000404592	-0.000404592
A5PISO	-2.45208e-05	-2.45208e-05
KAS14	0.0136509	0.479367
SHCHF	2.69238e-05	2.69238e-05
ACOAD5f	-0.00159873	0.464117
CS	0.141032	1.81645
MDH	-7.96234	1.36676
PROTRS	0.0381102	0.0381102
BPNT	0.00723874	2.48546
HACYLCOAEPI60	0	0
3OAS60	0.0136509	0.479367
ECOAH161	0	0
FACOAE100	0	3.71733
NFORGLUAH	0	0
TDPDRR	0.0748141	0.0748141
EX_mal_L_e	0	0
HFACOAE160	0	0
ACACtex	0	0
TDPDRE	0.0748141	0.0748141
ARBtex	0	0
MTHFR3	0.0074023	0.0074023
OMCDC	0.0486676	0.0486676
EX_cit_e	0	0
DPGM	0	0
GLYD	0.723168	5.04931
O2tpp	7.46167	7.46167
MEOHtex	0	0
ACCOACr	0.108306	3.42067
EX_glcn_e	0	0
DHAD2	0.0255715	0.0255715
GLYOX	0	0
DHAD1	0.100192	0.100192
DASYN160	0.000406777	0.000406777
3OAS140	4.90415e-05	0.465765
BTS6	2.69238e-05	2.69238e-05
3OAS141	0.0135895	0.0135895
DASYN161	0.000409999	0.000409999
NH4tex	0	0
MALCOAL	0	3.46091
ECOAH141	0	0
SULFOX2	0	7.42269e-13
3OAS80	0.0136509	0.479367
EX_tartr_L_e	0	0
MALCOAS	0	9.22015
EX_2driboa_e	0	0
OCTDPS2	2.69238e-05	2.69238e-05
PRAGSr	0.0331037	0.0331037
MPTSS	2.69238e-05	2.69238e-05
MPTSP	2.69238e-05	2.69238e-05
HFACOAE140	0	0
UDPGCGT	0	0
EX_DM_trnaser	-0.0380194	-0.0380194
UAGPT3	1.22604e-05	1.22604e-05
FT	7.40036e-06	7.40036e-06
ACOAD8f	-0.000785174	1.24084
EX_cobalt2_e	-2.69238e-05	-2.69238e-05
LPADSS	1.22604e-05	1.22604e-05
GLYO1	0	5.00146e-13
DHDPS	0.0315876	0.0315876
GLCNtex	0	0
GLUR	0.13533	0.13533
GK1	0.0149004	3.73223
MCOATA	0.108252	3.42062
CELLS	0.042508	0.042508
EX_mma_e	0	0
EAR120y	6.13019e-05	0.465777
ASPTRS_tASN	0.0306154	0.0306154
SDACT	8.07714e-05	8.07714e-05
SPMDAT1	0	0
SUCCtex	0	0
EX_DM_trnamet	-0.0069037	-0.0069037
OHPBAT	2.69238e-05	2.69238e-05
DASYN180	0.000392587	0.000392587
ZNabcpp	0.000404592	0.000404592
NTPP1	0	3.71733
NTPP2	0	3.71733
DASYN181	0.00638478	0.00638478
GALCDARABAtex	0	0
RBFSa	0.000134619	0.000134619
3OAS160	4.33681e-18	0.465716
3OAS161	0.0135895	0.0135895
EAR100y	6.13019e-05	0.465777
RBFSb	6.73095e-05	6.73095e-05
ECOAH121	0	0
DADK	0	3.71733
Biomass_Mextorquens_AM1_core	0.122604	0.122604
EX_ch4_e	-14.9	-14.9
CH4tex	14.9	14.9
PMMOipp	14.9	14.9
PMMODCipp	0	0
ALDD1	0	0
N2trpp	0	0
N2tex	0	0
EX_n2_e	0	0
EX_no2_e	0	2.40132e-13
NO2tex	-2.7474e-14	0
SAMMOi	0	1.20066e-13
NO3t7pp	1.19931	1.19931
NO3R1	1.19931	1.19931
NTRIR2x	1.19931	1.19931
PAMMOipp	0	0
HAMtpp	-5.52891e-14	0
NO2tpp	1.19931	1.19931
NORZ2	0	0
NIT_mc	0	0
SMMOi	0	0
CH4trpp	0	0
ANHMK	0	0
METSOXR2	0	0
NADPHQR2	0	7.43466
QRr	0	7.43466
UACMAMO	0	0
NDPK6	0	0
NDPK9	0	0
NDPK10	0	0
LIPOS	0	0
GTHRDHpp	0	0
PPS	0	7.43466
ORNTA	0	3.73638
CLPNS160	0	0
CLPNS161	0	0
CLPNS180	0	0
CLPNS181	0	0
SHSL2	0	0
XPPT	0	0
MSAR	0	0
BACCL	0	0
HGNTOR	0	0
34HPPOR	0	0
FTHFCL	0	0
CPPPGO2	0	0
GLUDy	0	3.73638
GLUDxi	0	3.73638
UDPGDC	0	0
HCITS	0	0
TRPAS2	0	3.71733
NTPTP1	0	0
HOPNTAL	0	0
CCGS	0	0
DAAD	0	0
HMGL	0	0
HEX7	0	0
LIPOCT	0	0
PFK_ppi	-0.220342	8.49186
PFK	0	0
SQLC	0	0
SQLC2	0	0
ACM6PH	0	0
CHOLD	0	0
TMDS3	0.00187437	0.00187437
OXADC	0	0
METGL	0	0
UREA	0	0
SCYSDS	0	0
MOCDS	0	0
MCITD	0	0
NMNS	0	0
DHCYTCPEROX	0	0.0223905
PPK2	0	7.43466
HAMR	0	1.13985e-13
HAORipp	0	5.69923e-14
ACSPW	0	1.73046
PC	0	8.37776
LYSDC	0	1.03622e-14
CADVt	0	0
DM_lys_L_e	0	0
EX_15dap_e	0	0
DM_15dap_c	0	1.60007e-14

## Sheet: lysA overexpression in NMS medi
EAOXRED	9.01e-05
IMPC	0.039361
HACD8i	-0.000746778
PANTS	2.56e-05
IMPD	0.0141461
OCPPH3	2.56e-05
PGSA161	0.000116981
LCAD	0
PGSA160	0.000116067
PPAtex	0
DTMPK	0.00178271
PPND	0.00882778
DXPRIi	0.000719562
PC11M	2.56e-05
PSERTr	0
CAT	0
CYO_2p	14.8787
UAMAS	1.17e-05
MNEUROPNDH3	4.51e-05
EX_DM_trnathr	-0.0358745
MNEUROPNDH2	4.51e-05
2AGPEAT161acp	0
PEPGLYCANGT	1.17e-05
MTHFC	2.71358
MTHFD	2.71358
THRD_L	0.024321
EAR60y	0.0129833
CDPMEK	0.000719562
PGMT	-0.115727
PGSA181	0.00182177
PItex	0.0815362
ASPCTr	0.0204693
MALtex	0
CYTK1	0.00799127
SUCCOAH	1.0454
HNEUROPNMT2	0
2AGPEAT180acp	0
HNEUROPNMT3	0
HNEUROPNMT4	0
DHPPDA2	6.4e-05
PGSA180	0.000112019
CITtex	0
PHYNDH_e	0
HNEUROPNMT6	4.51e-05
HNEUROPNMT5	4.51e-05
GLYCL_3	0
EX_ac_e	0
EX_etma_e	0
EDTXS1	1.17e-05
PRE3BS	2.56e-05
HACD1	-1.1109
HACD2	-0.00152055
HACD5	-0.00152055
HACD6	-0.00152055
HACD3	-0.00152055
MTRI2	0
HACD4	-0.00152055
ARGTRS	0.0281038
AACPS3	0.00077377
AACPS4	0
SHK3Dr	-0.0247874
AACPS5	0
AACPS6	0.000746778
IGPS	7.04e-05
EX_h2o_e	26.3943
GLYCLTDx	-9.54e-06
SULabcpp	0.00735935
HACD7	-0.00152055
SHCHD2	2.56e-05
RIBONAtex	0
ADK1	0.851155
PC6YM	2.56e-05
EX_pyr_e	0
SALMMT	0
GFUCS	0
GMPS	0
POLYPIP	0
DNTPPA	9.54e-06
MALTATr	0
ACACt2pp	0
PYRtex	0
GLUTRS	0.0320999
ATPM	3.5
FE2tex	0.000936225
GLXDH	0
MOBDMPTL	2.56e-05
HACYLCOAEPI100	0
DB4PS	0.000128036
LEUTRS	0.0462877
GLUPRT	0.0314848
HNEUROPNMT	0
PTPAT	2.56e-05
DDPA	0.0247874
ASPtex	0
FBA	0.209567
HEXTT	2.56e-05
RIBtex	0
AKGDH	0
LYXtex	0
EAR181y	0.0121451
2KDRIBtex	0
ALATRS	0.128666
PC17M	2.56e-05
HSERTA	0.00661731
TKT1	0.0304904
LPLIPAL2C161	0
CCR	0.00152055
PHETRS	0.0158541
P5CR	0.0461166
EX_5dglcn_e	0
ACACT7r	-0.00152055
ACACT5r	-0.00152055
P5CD	0
ETFDH	1.10938
PYAM5POr	0
LYSTRS	0.0300313
EAR141y	0.012925
UDPGLCUREPI	0
PC8XM	2.56e-05
ACACT6r	-0.00152055
FBP	0.209567
DALAOX	0
EX_for_e	0
KAT8	-0.000746778
DHAtpp	0
EAR140y	0
ADCPS2	2.56e-05
LPLIPAL2C181	0
EAR80y	0.0129833
LPLIPAL2C180	0
EX_h_e	-2.15352
MOBDabcpp	0.000410415
DHORD	0.0204693
EAR160y	0
PEMT181	0
PEMT180	0
SOTA	0
APRAUR	6.4e-05
CA2tex	0.00105181
ACACT4r	-0.00152055
AICART	0.039361
NADS1	0
HACYLCOAEPI140	0
NADS2	0.000800707
HPPK2	9.54e-06
COBALT2tpp	2.56e-05
RNDR3	0.00565982
ENCOAI81	0
RNDR2	0.00387711
UAGDP	0.00391676
PDX5PS2	2.56e-05
RNDR1	0.00178271
AKGtex	0
PUNP8	0
L_LALDtex	0
PUNP9	7.68e-05
L_LACt2rpp	0
EAR40y	0.0129833
ALAGLUEPI	0
GPDDA1	0
GPDDA2	0
DAHETBCLPHDDH	0
PUNP7	0
EX_DM_trnaala	-0.128666
GLNTRAT	0.0323471
ACACT3r	-0.00152055
EX_DM_trnaile	-0.024321
EX_photon_e	0
DCAtex	0
3HBCDH	0
GCALDDr	9.54e-06
ACACT2r	-0.00152055
PPNDH	0.0158541
EX_xylnt_D_e	0
FPGS8	0
ACtex	0
AHC	0.000423008
ALATA_D	0.128701
ZCARDS2	4.51e-05
ADSK	0.00688476
GTPCII2	6.4e-05
HACYLCOAEPI120	0
LYXNTtex	0
ENCOAI61	0
TDSK	1.17e-05
APG3PAT160	0.000386885
ACALDtpp	0
APG3PAT161	0.00038995
ADSS	0.0252149
FACOAL60	0
EX_DM_AMOB	2.56e-05
ACACT1r	1.14325
GLUTRS_Gln_	0.0323471
CYOO_4p	0
MEOHDH	14.9
PHYNS	4.51e-05
CDPGD	0
G2PP	0
TRPS1r	7.04e-05
OPHBDC	2.56e-05
ENCOAI41	0
TSULtex	0
SORBNLDH	0
APG3PAT180	0.000373389
APG3PAT181	0.00607255
APH181	0
ACPpds	0
EX_rib_D_e	0
CHORS	0.0247874
APH180	0
CHORM	0.0246819
SUCOAS	0
FACOAL80	0
5DGLCNR	0
PPDK	0
BTCAL	0
H2MB4PRD	0.000148368
GTHS	2.56e-05
XYLNTtex	0
APH161	0
TRPS3r	0
ADPT	7.68e-05
EX_DM_trnatrp	-7.04e-05
CATetoh	0
ACS	0
MREDR	0
PPPGO	5.12e-05
USHD	1.17e-05
ZCARDS	4.51e-05
EX_ca2_e	-0.000577211
APH160	0
UAGAAT	2.33e-05
CA2abctpp	0.00105181
HSTPTr	0.00790173
ZCARDS2_e	0
EX_lald_L_e_	0
TRPTRS	7.04e-05
PROD2	0.00987006
DHORTS	0.0204693
MOGDS	2.56e-05
EAR161y	0.012925
CYSTRS	0.000113803
3HAD121	0.012925
3HAD120	5.83e-05
IPMD2r	0.0462877
FCLPA	0
EX_dca_e	0
COCHL	2.56e-05
CPPPGO	5.12e-05
EX_galcDarab_e	0
HISTDADH	0.00790173
EX_tsul_e	0
ASPTA	-0.504643
KAT141	0
TARTRtex	0
PSD161	0.000265167
GLU5K	0.0362465
PSD160	0.00026308
TARTR_Ltpp	0
DXPS	0.000745169
FACOAL121	0
FACOAL120	0
VALTRS	0.048979
EX_D_araba_e	0
PHAS	0.0323448
EX_mg2_e	-0.000962019
SUCCD1	1.10856
MEPCT	0.000719562
EX_lac_L_e	0
METAT	0.000551044
ETOHtex	0
3HAD100	0.0129833
FRDOr	0.000719562
THRTRS	0.0358745
EX_co2_e	10.0491
TMPPP	2.56e-05
KAT121	0
HACDHG	0
PRMICI	0.00790173
EX_araba_e	0
VALTA	0.048979
FCLT	5.12e-05
PRFGS	0.0314848
MFPGS5	0
TYRTA	0.00882778
T2DECAI	0.012925
THMBIOS2	2.56e-05
THMBIOS3	2.56e-05
THMBIOS4	2.56e-05
PPCDC	2.56e-05
FACOAL100	0
PPA2	2.56e-05
RPI	-0.030339
DHXANTI	0
EX_DM_trnaphe	-0.0158541
ORPT	0.0204693
DHXANTH	0
GMPS2	0.0141461
PYK	-1.18434
RPE	-0.0304904
PTA2	0
ASAD	0.340557
ACPS1	0
FMNRx2	-3.84e-05
HACOAEPI141	0
BMMALCOAL	1.10938
EX_DM_thif	0
PRAMPC	0.00790173
FUM	1.19334
EX_fe2_e	-0.000936225
EX_acac_e	0
EX_DM_thil	0
KAT181	0
HGBAMS	2.56e-05
DHDPRy	0.0631624
EX_DM_trnagln	-0.0323471
BRFAPS	0
EX_DM_this	0
EX_ppa_e	0
LPLIPAL1E181	0
LEUTAi	0.0462877
EX_DM_trnaglu	-0.0320999
ACONT	0.134135
EX_DM_trnagly	-0.136723
FPGS10	0
ENCOAI162	0
FACOAL161	0
ENCOAI161	0
FACOAL160	0
NNDMBRT	2.56e-05
ALAR	-0.128677
ALAS	0.00081943
ORNDC	0.00529122
NADK	0.000284762
EX_cu2_e	-0.000384807
DBTSr	2.56e-05
GLUtex	0
HACOAEPI121	0
GAPD	-0.429999
CU2abcpp	0
KDOPS	2.33e-05
GLYAMDTRc	0
UPP3S	0.000102429
UPP3MT	5.12e-05
KDOPP	2.33e-05
THD2pp	0
EX_so4_e	-0.00735935
ETHMALCOAM	1.10938
LPLIPAL1E160	0
LPLIPAL1E161	0
KAT161	0
HSK	0.270777
EX_glyclt_e	0
MLMPTDHy	13.436
PHBD2	0
ENCOAI182	0
FACOAL141	0
ENCOAI181	0
FRTT	0.000115722
FACOAL140	0
ASP1DC	2.56e-05
DHQS	0.0247874
CBPS	0.0485731
LDH_L	0
ETHAtex	0
THZS	2.56e-05
DNMPPA	9.54e-06
EX_mobd_e	-0.000410415
DHQD	0.0247874
CLt4	0.000577211
GLYTRS	0.136723
Kabcpp	0.0215107
PPAt7	0
MALDHDC	0
HNEUROPNS2	4.51e-05
EX_dha_e	0
HNEUROPNS1	4.51e-05
ACPPAT181	0.00607255
UAAGDS	1.17e-05
SDPDS	0.0631624
HACOAEPI181	0
MCPST	0
ACPPAT180	0.000373389
AIRCr	0.0314592
IG3PS	0.00790173
MOBDtex	0.000410415
GLYCLTtex	0
ACOTA	-0.033395
TMDS	0
PRAIS	0.0314848
ANACMURLALAA	0
UPPDC1	5.12e-05
ARABA_Dtex	0
EX_arab_D_e	0
SPOTN	2.56e-05
3OAR40	0.0129833
XYLtex	0
SSALyr	0
UDPGDr	0
DTPCUDCPPP	1.17e-05
PPC	0.999305
PPA	1.00551
BTCOAC	0
3HAD181	0.0121451
PPDODH	0
3HAD180	0
ACPPAT161	0.00038995
ACPPAT160	0.000386885
HACOAEPI161	0
MLMPTDH	1.46398
PRAI	7.04e-05
CBLAT	0
DPCOAK	2.56e-05
FTHFL	2.78443
EX_akg_e	0
ILETRS	0.024321
ASPO6	0.000800707
PRE5MT	2.56e-05
FACOAL180	0
FACOAL181	0
FALDHp	0
TRSARr	0
DHOANTC	0
PRBK	0
LPLIP2AGPC160	0
DHFS	9.54e-06
PGPP160	0.000116067
DHFR	9.54e-06
EX_meoh_e	0
PGPP161	0.000116981
3HAD160	0
3HAD161	0.012925
LGTHL	0
PTAr	-0.272703
FMFTFMPT	14.9
PMPK	2.56e-05
GMAND	0
G3PD2	0.00938962
12PPDStex	0
3OAR80	0.0129833
METTRS	0.0065661
TRPS2	0
AMAOTr	2.56e-05
FALDA	0
ADOCBLPS	2.56e-05
H2MPTR2	3.85e-05
PRATPP	0.00790173
OMMBZH2	2.56e-05
ADMDCr	0
PGPP180	0.000112019
EX_DM_5dr1p	7.68e-05
3HAD140	0
PGPP181	0.00182177
TMPKr	2.56e-05
3HAD141	0.012925
EX_h2o2_e	0
EX_asp_L_e	0
EX_DM_trnaleu	-0.0462877
DUTPDP	0.00178271
3PSMES	0.0247874
FMETTRS	0
NAtex	0.000474596
MI3PP	0
2AGPEAT160acp	0
OCOAT1r	0
ADCMS2	0
PSD181	0.00412933
PSD180	0.000253903
3OAR60	0.0129833
ADOCBIK	0
PERD	2.56e-05
H2MB4P	0.000719562
UDPACGAM	0
HACOADH121	0
E4PD	2.56e-05
CLtex	0.000577211
KDOCT	2.33e-05
3OAR160	0
ADSL1r	0.0252149
3OAR161	0.012925
PHYNS2	4.51e-05
PGI	0.119869
HFACOAE60	0
PGK	0.429999
GF6PTAr	0.00391676
UAMAGS	1.17e-05
PGM	0.429999
MMPTC	14.9
MG2tex	0.000962019
MPTAT	2.56e-05
FUMtex	0
EX_cl_e	-0.000577211
LPLIP1AGPC160	0
PPBNGS	0.000409715
PAPR	0.00688476
PYRt2rpp	0
PSP_D	0
MALCOATE	0
OCMPH2	2.56e-05
PIt2rpp	0.0815362
PSP_L	0
SPMS	0
FACOAE180	0.000746778
EX_pi_e	-0.0815362
UGMDDS	1.17e-05
OCBT	0.0281038
MNtex	0.000384807
HEMEOS	2.56e-05
BDH	0
G5SD	0.0362465
AGPR	0.033395
3OAR140	4.66e-05
3OAR141	0.012925
EX_ribona_e	0
OHPHM	2.56e-05
GALCDARABtex	0
O2tex	22.3611
ARABAtex	0
MAN1PT	0
ADSL2r	0.0314592
TALA	-0.0304904
AGPAT161	0.00038995
3HAD60	0.0129833
PGCDr	0
AGPAT160	0.000386885
GTHPp	0
FACOAE160	0.00077377
PDH	0.776933
3OAR120	5.83e-05
ILETA	0.024321
3OAR121	0.012925
MTAP	0
EX_k_e	-0.0215107
H2Otex	-26.3943
DAPE	0.0631624
ASPK	0.340557
EX_DM_h2mpt	-3.85e-05
NO3tex	1.2069
EX_xyl_D_e	0
HMPK1	0
Htex	2.15352
PDX5PO	2.56e-05
UPP3MT2	5.12e-05
FORtex	0
GTHOr	0
ACS2	0
AGPAT180	0.000373389
G5SADr	0.0362465
AGPAT181	0.00607255
EX_etoh_e	0
UAPGR	1.17e-05
NDPK8	0.00178271
NDPK7	0.00565982
ATPS4rpp	21.6533
3HAD80	0.0129833
NDPK5	0.00387711
NDPK4	0.0729383
NDPK3	0.00233145
FACOAE140	0
NDPK2	0.0689575
NDPK1	0.0355095
CA2NAtpp	0.000474596
METACH	0.00661731
GGTT	2.56e-05
ANPRT	7.04e-05
AKGt2rpp	0
EX_12ppd_S_e	0
HFACOAE80	0
3OAR100	0.0129833
MECDPS	0.000719562
GLNS	1.23204
F6PPKL	0.0552906
Zn2tex	0.000384807
MG2uabcpp	0.000962019
ACOATA	0.0129833
EX_fald_e	0
EX_nh4_e	0
MOHMT	2.56e-05
CMBLD2	0
5DGLCNtex	0
AGDC_r	0
HCO3E	1.26094
CMBLD4	0
CMBLD3	0
OXAFORtpp	0
EX_na1_e	-0.000474596
EX_oxa_e	0
PHYNDH2	4.51e-05
QULNS	0.000800707
GLUCYS	2.56e-05
EX_glc_e	0
IGPDH	0.00790173
ICDHyr	0.134135
MACACI	0
FORMMFRHD	14.9
R3HAD40	0.0129833
ENCOAI141	0
ENCOAI142	0
ACGLCAM	0
ARGSSr	0.0281038
FACOAE60	0
ACOAD161	0
UMPK	0.0204926
PRASCS	0.0314592
ASNS1	0
SDPTA	0.0631624
TPI	0.219757
PSSA181	0.00425078
PSSA180	0.00026137
NH4tpp	0
TRE6PP	0.00414216
TRE6PS	0.00414216
THRPD	2.56e-05
ACBIPGT	2.56e-05
MAN6PI	0
THRPS	2.56e-05
MESACOAH	1.10938
LPLIPAL1C180	0
ADCYRS	2.56e-05
LPLIPAL1C181	0
EX_DM_trnacys	-0.000113803
EX_no3_e	-1.2069
ETOHDH	0
ARGSL	0.0281038
PTHPS	0
ENCOAI121	0
ASPTRNAAMT	0.0291183
EX_o2_e	-22.3611
ACODA	0
ENCOAI122	0
RZ5PP	0
ASPTRS	0.0288944
NNAMr	0
UDPG4E	0
ACGS	0
ACOAD181	0
Ktex	0.0215107
HACOADH181	0
HACOADH180	0
HTHRPD	2.56e-05
ACGK	0.033395
FACOAE80	0
CMPKDOT2	1.17e-05
CMPKDOT1	1.17e-05
HEMEDS2	2.56e-05
SPODM	0
PSSA161	0.000272968
PSSA160	0.000270818
GLYCOX3	0
GLYCOX4	0
OXAtex	0
PPNCL2	2.56e-05
GLYCOX5	2.56e-05
UHGADA	2.33e-05
THRS	0.270777
BB_RMN	0.0711556
METSr	0.00704032
EX_DM_trnahis	-0.00790173
THRA	0.210556
LPLIPAL1C161	0
HMBS	0.000102429
CYSTL	0
CYSSr	0.000190624
ACOAD121	0
CBIAT	0
FMNAT	2.56e-05
ENCOAI101	0
PGLYCP	0
KARA2	0.024321
HACOADH160	0
HACOADH161	0
DHPS2	9.54e-06
SADT	0.00688476
PC20M	2.56e-05
KARA1	0.0952923
2DRIBOAtex	0
IPPMIb	0.0462877
G1PTT	0.0711556
SKMK	0.0247874
EX_fum_e	0
PC6AR	2.56e-05
3OAR181	0.0121451
GLYCK2	2.66325
H2O2tpp	-0.0212956
H2MB4PRD2	0.000571194
EX_DM_trnapro	-0.0362465
U23GAAT	2.33e-05
THMBTHIC	2.56e-05
ACOAD141	0
DPR	2.56e-05
SERGLXAT	2.66325
EX_2kdrib_e	0
3OAR180	0
HACOADH141	0
5DGLCNt2rpp	0
MPTFALDA	14.9
3HBCD	0
PMDPHT	6.4e-05
CO2tex	-10.0491
NTD10	0
NTD11	0
EX_lyxnt_e	0
ACKr	0.217413
ACLS	0.0952923
FALDtpp	14.9
HSDyi	0.277394
ATPPRTr	0.00790173
NNDPR	0.000800707
NO3Ras	0
EX_DM_trnaarg	-0.0281038
PPTT	2.56e-05
PTRCtex	0
GLUSy	1.01623
LPLIPAL2E180	0
EX_succ_e	0
LPLIPAL2E181	0
PIuabcpp	0
THMBIOS	2.56e-05
FE2t2pp	0.000936225
NNATr	0.000800707
EX_DM_trnalys	-0.0300313
ARAB_Dtex	0
ALDD2y	0.210556
HPTRED	0
PHYNDH2_e	0
MPTSA	5.12e-05
TRDR	0.0182044
FE2abcpp	0
ZCARDS_e	0
3OAS100	0.0129833
PGAMT	-0.00391676
OMBZLM	2.56e-05
ETHMALCOAEPM	1.10938
RBFK	6.4e-05
MNt2pp	0.000384807
HBZOPT	2.56e-05
LPLIPAL2E160	0
DHNPA2	9.54e-06
LPLIPAL2E161	0
PHYNDH	4.51e-05
EX_DM_trnatyr	-0.00880218
EX_lyx_L_e	0
CHRPL	2.56e-05
SERAT	0.000190624
PPCOAC	1.10938
H2O2syn	0
TYRTRS	0.00880218
2AGPEAT181acp	0
PMANM	0
NTD9	0
HFACOAE180	0
NTD7	-0.000423008
EX_DM_rbrdxOX	0
L_LACtex	0
UDPDPS5	7.04e-06
UDPDPS6	7.04e-06
UDPDPS3	7.04e-06
ENO	2.23326
UDPDPS4	7.04e-06
MME	1.10938
CYRDAAT	2.56e-05
H2Otpp	-11.4517
UDPDPS9	7.04e-06
UDPDPS7	7.04e-06
GHMT2r	2.70473
UDPDPS8	7.04e-06
3OAS121	0.012925
3OAS120	5.83e-05
MMM2r	1.10938
AACOAR	0.0323448
ADOCBLPPA	2.56e-05
ECOAH5	-0.00152055
ECOAH6	-0.00152055
BB_ACGAM	0.00387011
ECOAH3	-0.00152055
ECOAH4	-0.00152055
AOXSr	2.56e-05
GARFT	0.0314848
ECOAH7	-0.00152055
COBS2	0
ECOAH8	-0.000746778
EX_DM_trnaasn	-0.0291183
ECOAH1	1.1109
ECOAH2	-0.00152055
EX_DM_trnaasp	-0.0288944
CO2tpp	-10.0491
FMNDESTRUC	1.28e-05
TDPGDH	0.0711556
PHETA1	0.0158541
HISTP	0.00790173
ADCS	9.54e-06
GALU	0.0445714
CCRC	1.10938
IPPS2	0.0462877
HISTRS	0.00790173
ACOAD2f	-0.00152055
CU2abctpp	0.000384807
MMAtex	0
PEMT160	0
HACYLCOAEPI80	0
ADCL	9.54e-06
PEMT161	0
EX_etha_e	0
CTPS2	0.015804
ACHBS	0.024321
ORNTAC	0.033395
EX_ptrc_e	0
ACOAD3f	-0.00152055
DMATT	0.000148368
FDHr	12.1158
ETMAt_e	0
AROGDH	0
GTPCI	9.54e-06
SO4tex	0.00735935
LDH_D3	0
HSPMDS	0
HSPMS	0
DCTPD	0.00178271
BIOTINS	2.56e-05
PAPPT3	1.17e-05
COBALT2tex	2.56e-05
PAPPT1	0
HISTD	0.00790173
DVPCLPHVR	0
UQCYOR_2p	0
EX_galcDaraba_e	0
EX_arab_L_e	0
ACOAD1f	0
SULR	0.00688476
G1PACT	0.00391676
DMQMT2	2.56e-05
ANS	7.04e-05
MSUCCCOADH	1.10938
NTPP7	0
NIGOSH	0
NTPP8	0
ACOAD6f	-0.00152055
NTPP3	0
NTPP4	0
UAGCVT	1.17e-05
CU2tex	0.000384807
NTPP5	0
NTPP6	0
HFACOAE120	0
EAR121y	0.012925
ALAALAr	1.17e-05
FALDtex	0
ECOAH181	0
GLYKr	0
EX_mn2_e	-0.000384807
DGK1	0
ACOAD7f	-0.00152055
3OAS180	0
3OAS181	0.0121451
NAPRTr	-2.56e-05
NADH11	6.2463
HACYLCOAEPI40	0
FACOAE120	0
DHAtex	0
PNTK	2.56e-05
PHOTOSYS1C	0
OMPDC	0.0204693
H2O2tex	0
SERTRS	0.0361602
Kt3pp	0
ACOAD4f	-0.00152055
CO2DAMR	2.56e-05
AMMQT8_2	0
CO2DAMS	0
CYOD	0
EX_glu_L_e	0
HFACOAE100	0
EX_DM_oxEA	0
GRTT	0.000148368
THDPS	0.0631624
PRPPS	0.0608294
EAR180y	0
DAPDC	0.0631508
CREAH	0
EX_zn2_e	-0.000384807
A5PISO	-2.33e-05
KAS14	0.0129833
SHCHF	2.56e-05
ACOAD5f	-0.00152055
CS	0.134135
MDH	-0.360527
PROTRS	0.0362465
BPNT	0.00688476
HACYLCOAEPI60	0
3OAS60	0.0129833
ECOAH161	0
FACOAE100	0
NFORGLUAH	0
TDPDRR	0.0711556
EX_mal_L_e	0
HFACOAE160	0
ACACtex	0
TDPDRE	0.0711556
ARBtex	0
MTHFR3	0.00704032
OMCDC	0.0462877
EX_cit_e	0
DPGM	0
GLYD	2.66325
O2tpp	7.4611
MEOHtex	0
ACCOACr	0.10301
EX_glcn_e	0
DHAD2	0.024321
GLYOX	0
DHAD1	0.0952923
DASYN160	0.000386885
3OAS140	4.66e-05
BTS6	2.56e-05
3OAS141	0.012925
DASYN161	0.00038995
NH4tex	0
MALCOAL	1.55387
ECOAH141	0
SULFOX2	0
3OAS80	0.0129833
EX_tartr_L_e	0
MALCOAS	1.55387
EX_2driboa_e	0
OCTDPS2	2.56e-05
PRAGSr	0.0314848
MPTSS	2.56e-05
MPTSP	2.56e-05
HFACOAE140	0
UDPGCGT	0
EX_DM_trnaser	-0.0361602
UAGPT3	1.17e-05
FT	7.04e-06
ACOAD8f	-0.000746778
EX_cobalt2_e	-2.56e-05
LPADSS	1.17e-05
GLYO1	0
DHDPS	0.0631624
GLCNtex	0
GLUR	0.128712
GK1	0.0141717
MCOATA	0.102958
CELLS	0.0404293
EX_mma_e	0
EAR120y	5.83e-05
ASPTRS_tASN	0.0291183
SDACT	7.68e-05
SPMDAT1	0
SUCCtex	0
EX_DM_trnamet	-0.0065661
OHPBAT	2.56e-05
DASYN180	0.000373389
ZNabcpp	0.000384807
NTPP1	0
NTPP2	0
DASYN181	0.00607255
GALCDARABAtex	0
RBFSa	0.000128036
3OAS160	0
3OAS161	0.012925
EAR100y	5.83e-05
RBFSb	6.4e-05
ECOAH121	0
DADK	0
Biomass_Mextorquens_AM1_core	0.116608
EX_ch4_e	-14.9
CH4tex	14.9
PMMOipp	14.9
PMMODCipp	0
ALDD1	0
N2trpp	0
N2tex	0
EX_n2_e	0
EX_no2_e	0
NO2tex	0
SAMMOi	0
NO3t7pp	1.2069
NO3R1	1.2069
NTRIR2x	1.2069
PAMMOipp	0
HAMtpp	0
NO2tpp	1.2069
NORZ2	0
NIT_mc	0
SMMOi	0
CH4trpp	0
ANHMK	0
METSOXR2	0
NADPHQR2	7.64266
QRr	0
UACMAMO	0
NDPK6	0
NDPK9	0
NDPK10	0
LIPOS	0
GTHRDHpp	0
PPS	0
ORNTA	0
CLPNS160	0
CLPNS161	0
CLPNS180	0
CLPNS181	0
SHSL2	0
XPPT	0
MSAR	0
BACCL	0
HGNTOR	0
34HPPOR	0
FTHFCL	0
CPPPGO2	0
GLUDy	0
GLUDxi	0
UDPGDC	0
HCITS	0
TRPAS2	0
NTPTP1	0
HOPNTAL	0
CCGS	0
DAAD	0
HMGL	0
HEX7	0
LIPOCT	0
PFK_ppi	0
PFK	0
SQLC	0
SQLC2	0
ACM6PH	0
CHOLD	0
TMDS3	0.00178271
OXADC	0
METGL	0
UREA	0
SCYSDS	0
MOCDS	0
MCITD	0
NMNS	0
DHCYTCPEROX	0.0212956
PPK2	0
HAMR	0
HAORipp	0
ACSPW	0.776933
PC	0
LYSDC	0.0331195
CADVt	0
DM_lys_L_e	0
EX_15dap_e	0
DM_15dap_c	0.0331195

## Sheet: lysC overexpression in NMS medi
EAOXRED	9.47e-05
IMPC	0.0413847
HACD8i	-0.000785174
PANTS	2.69e-05
IMPD	0.0148734
OCPPH3	2.69e-05
PGSA161	0.000122996
LCAD	0
PGSA160	0.000122035
PPAtex	0
DTMPK	0.00187437
PPND	0.00928167
DXPRIi	0.000756559
PC11M	2.69e-05
PSERTr	0
CAT	0
CYO_2p	14.8776
UAMAS	1.23e-05
MNEUROPNDH3	4.74e-05
EX_DM_trnathr	-0.0377191
MNEUROPNDH2	4.74e-05
2AGPEAT161acp	0
PEPGLYCANGT	1.23e-05
MTHFC	2.65041
MTHFD	2.65041
THRD_L	0.0255715
EAR60y	0.0136509
CDPMEK	0.000756559
PGMT	-0.121677
PGSA181	0.00191544
PItex	0.0857284
ASPCTr	0.0215217
MALtex	0
CYTK1	0.00840214
SUCCOAH	1.00093
HNEUROPNMT2	0
2AGPEAT180acp	0
HNEUROPNMT3	0
HNEUROPNMT4	0
DHPPDA2	6.73e-05
PGSA180	0.000117778
CITtex	0
PHYNDH_e	0
HNEUROPNMT6	4.74e-05
HNEUROPNMT5	4.74e-05
GLYCL_3	0
EX_ac_e	0
EX_etma_e	0
EDTXS1	1.23e-05
PRE3BS	2.69e-05
HACD1	-1.03497
HACD2	-0.00159873
HACD5	-0.00159873
HACD6	-0.00159873
HACD3	-0.00159873
MTRI2	0
HACD4	-0.00159873
ARGTRS	0.0295487
AACPS3	0.000813553
AACPS4	0
SHK3Dr	-0.0260619
AACPS5	0
AACPS6	0.000785174
IGPS	7.41e-05
EX_h2o_e	26.4282
GLYCLTDx	-1e-05
SULabcpp	0.00773774
HACD7	-0.00159873
SHCHD2	2.69e-05
RIBONAtex	0
ADK1	0.894918
PC6YM	2.69e-05
EX_pyr_e	0
SALMMT	0
GFUCS	0
GMPS	0
POLYPIP	0
DNTPPA	1e-05
MALTATr	0
ACACt2pp	0
PYRtex	0
GLUTRS	0.0337504
ATPM	3.5
FE2tex	0.000984361
GLXDH	0
MOBDMPTL	2.69e-05
HACYLCOAEPI100	0
DB4PS	0.000134619
LEUTRS	0.0486676
GLUPRT	0.0331037
HNEUROPNMT	0
PTPAT	2.69e-05
DDPA	0.0260619
ASPtex	0
FBA	0.220342
HEXTT	2.69e-05
RIBtex	0
AKGDH	0
LYXtex	0
EAR181y	0.0127696
2KDRIBtex	0
ALATRS	0.135281
PC17M	2.69e-05
HSERTA	0.00695754
TKT1	0.0320581
LPLIPAL2C161	0
CCR	0.00159873
PHETRS	0.0166692
P5CR	0.0484877
EX_5dglcn_e	0
ACACT7r	-0.00159873
ACACT5r	-0.00159873
P5CD	0
ETFDH	1.03337
PYAM5POr	0
LYSTRS	0.0315754
EAR141y	0.0135896
UDPGLCUREPI	0
PC8XM	2.69e-05
ACACT6r	-0.00159873
FBP	0.220342
DALAOX	0
EX_for_e	0
KAT8	-0.000785174
DHAtpp	0
EAR140y	0
ADCPS2	2.69e-05
LPLIPAL2C181	0
EAR80y	0.0136509
LPLIPAL2C180	0
EX_h_e	-2.12496
MOBDabcpp	0.000431516
DHORD	0.0215217
EAR160y	0
PEMT181	0
PEMT180	0
SOTA	0
APRAUR	6.73e-05
CA2tex	0.00110589
ACACT4r	-0.00159873
AICART	0.0413847
NADS1	0
HACYLCOAEPI140	0
NADS2	0.000841876
HPPK2	1e-05
COBALT2tpp	2.69e-05
RNDR3	0.00595082
ENCOAI81	0
RNDR2	0.00407645
UAGDP	0.00411814
PDX5PS2	2.69e-05
RNDR1	0.00187437
AKGtex	0
PUNP8	0
L_LALDtex	0
PUNP9	8.08e-05
L_LACt2rpp	0
EAR40y	0.0136509
ALAGLUEPI	0
GPDDA1	0
GPDDA2	0
DAHETBCLPHDDH	0
PUNP7	0
EX_DM_trnaala	-0.135281
GLNTRAT	0.0340103
ACACT3r	-0.00159873
EX_DM_trnaile	-0.0255715
EX_photon_e	0
DCAtex	0
3HBCDH	0
GCALDDr	1e-05
ACACT2r	-0.00159873
PPNDH	0.0166692
EX_xylnt_D_e	0
FPGS8	0
ACtex	0
AHC	0.000444757
ALATA_D	0.135318
ZCARDS2	4.74e-05
ADSK	0.00723874
GTPCII2	6.73e-05
HACYLCOAEPI120	0
LYXNTtex	0
ENCOAI61	0
TDSK	1.23e-05
APG3PAT160	0.000406777
ACALDtpp	0
APG3PAT161	0.000409999
ADSS	0.0265113
FACOAL60	0
EX_DM_AMOB	2.69e-05
ACACT1r	1.06898
GLUTRS_Gln_	0.0340103
CYOO_4p	0
MEOHDH	14.9
PHYNS	4.74e-05
CDPGD	0
G2PP	0
TRPS1r	7.41e-05
OPHBDC	2.69e-05
ENCOAI41	0
TSULtex	0
SORBNLDH	0
APG3PAT180	0.000392587
APG3PAT181	0.00638478
APH181	0
ACPpds	0
EX_rib_D_e	0
CHORS	0.0260619
APH180	0
CHORM	0.0259509
SUCOAS	0
FACOAL80	0
5DGLCNR	0
PPDK	0
BTCAL	0
H2MB4PRD	0.000155996
GTHS	2.69e-05
XYLNTtex	0
APH161	0
TRPS3r	0
ADPT	8.08e-05
EX_DM_trnatrp	-7.41e-05
CATetoh	0
ACS	0
MREDR	0
PPPGO	5.38e-05
USHD	1.23e-05
ZCARDS	4.74e-05
EX_ca2_e	-0.000606889
APH160	0
UAGAAT	2.45e-05
CA2abctpp	0.00110589
HSTPTr	0.008308
ZCARDS2_e	0
EX_lald_L_e_	0
TRPTRS	7.41e-05
PROD2	0.0103775
DHORTS	0.0215217
MOGDS	2.69e-05
EAR161y	0.0135896
CYSTRS	0.000119654
3HAD121	0.0135896
3HAD120	6.13e-05
IPMD2r	0.0486676
FCLPA	0
EX_dca_e	0
COCHL	2.69e-05
CPPPGO	5.38e-05
EX_galcDarab_e	0
HISTDADH	0.008308
EX_tsul_e	0
ASPTA	-0.819012
KAT141	0
TARTRtex	0
PSD161	0.000278801
GLU5K	0.0381102
PSD160	0.000276606
TARTR_Ltpp	0
DXPS	0.000783482
FACOAL121	0
FACOAL120	0
VALTRS	0.0514973
EX_D_araba_e	0
PHAS	0.0340078
EX_mg2_e	-0.00101148
SUCCD1	1.03251
MEPCT	0.000756559
EX_lac_L_e	0
METAT	0.000579376
ETOHtex	0
3HAD100	0.0136509
FRDOr	0.000756559
THRTRS	0.0377191
EX_co2_e	9.97384
TMPPP	2.69e-05
KAT121	0
HACDHG	0
PRMICI	0.008308
EX_araba_e	0
VALTA	0.0514973
FCLT	5.38e-05
PRFGS	0.0331037
MFPGS5	0
TYRTA	0.00928167
T2DECAI	0.0135896
THMBIOS2	2.69e-05
THMBIOS3	2.69e-05
THMBIOS4	2.69e-05
PPCDC	2.69e-05
FACOAL100	0
PPA2	2.69e-05
RPI	-0.0318989
DHXANTI	0
EX_DM_trnaphe	-0.0166692
ORPT	0.0215217
DHXANTH	0
GMPS2	0.0148734
PYK	-0.690723
RPE	-0.0320581
PTA2	0
ASAD	0.646489
ACPS1	0
FMNRx2	-4.04e-05
HACOAEPI141	0
BMMALCOAL	1.03337
EX_DM_thif	0
PRAMPC	0.008308
FUM	1.12165
EX_fe2_e	-0.000984361
EX_acac_e	0
EX_DM_thil	0
KAT181	0
HGBAMS	2.69e-05
DHDPRy	0.0315876
EX_DM_trnagln	-0.0340103
BRFAPS	0
EX_DM_this	0
EX_ppa_e	0
LPLIPAL1E181	0
LEUTAi	0.0486676
EX_DM_trnaglu	-0.0337504
ACONT	0.141032
EX_DM_trnagly	-0.143753
FPGS10	0
ENCOAI162	0
FACOAL161	0
ENCOAI161	0
FACOAL160	0
NNDMBRT	2.69e-05
ALAR	-0.135293
ALAS	0.000861561
ORNDC	0.00556327
NADK	0.000299403
EX_cu2_e	-0.000404592
DBTSr	2.69e-05
GLUtex	0
HACOAEPI121	0
GAPD	-0.452108
CU2abcpp	0
KDOPS	2.45e-05
GLYAMDTRc	0
UPP3S	0.000107695
UPP3MT	5.38e-05
KDOPP	2.45e-05
THD2pp	0
EX_so4_e	-0.00773774
ETHMALCOAM	1.03337
LPLIPAL1E160	0
LPLIPAL1E161	0
KAT161	0
HSK	0.607944
EX_glyclt_e	0
MLMPTDHy	12.6192
PHBD2	0
ENCOAI182	0
FACOAL141	0
ENCOAI181	0
FRTT	0.000121672
FACOAL140	0
ASP1DC	2.69e-05
DHQS	0.0260619
CBPS	0.0510705
LDH_L	0
ETHAtex	0
THZS	2.69e-05
DNMPPA	1e-05
EX_mobd_e	-0.000431516
DHQD	0.0260619
CLt4	0.000606889
GLYTRS	0.143753
Kabcpp	0.0226167
PPAt7	0
MALDHDC	0
HNEUROPNS2	4.74e-05
EX_dha_e	0
HNEUROPNS1	4.74e-05
ACPPAT181	0.00638478
UAAGDS	1.23e-05
SDPDS	0.0315876
HACOAEPI181	0
MCPST	0
ACPPAT180	0.000392587
AIRCr	0.0330767
IG3PS	0.008308
MOBDtex	0.000431516
GLYCLTtex	0
ACOTA	-0.035112
TMDS	0
PRAIS	0.0331037
ANACMURLALAA	0
UPPDC1	5.38e-05
ARABA_Dtex	0
EX_arab_D_e	0
SPOTN	2.69e-05
3OAR40	0.0136509
XYLtex	0
SSALyr	0
UDPGDr	0
DTPCUDCPPP	1.23e-05
PPC	1.07926
PPA	1.0572
BTCOAC	0
3HAD181	0.0127696
PPDODH	0
3HAD180	0
ACPPAT161	0.000409999
ACPPAT160	0.000406777
HACOAEPI161	0
MLMPTDH	2.28076
PRAI	7.41e-05
CBLAT	0
DPCOAK	2.69e-05
FTHFL	2.7249
EX_akg_e	0
ILETRS	0.0255715
ASPO6	0.000841876
PRE5MT	2.69e-05
FACOAL180	0
FACOAL181	0
FALDHp	0
TRSARr	0
DHOANTC	0
PRBK	0
LPLIP2AGPC160	0
DHFS	1e-05
PGPP160	0.000122035
DHFR	1e-05
EX_meoh_e	0
PGPP161	0.000122996
3HAD160	0
3HAD161	0.0135896
LGTHL	0
PTAr	-0.609969
FMFTFMPT	14.9
PMPK	2.69e-05
GMAND	0
G3PD2	0.00987239
12PPDStex	0
3OAR80	0.0136509
METTRS	0.0069037
TRPS2	0.323244
AMAOTr	2.69e-05
FALDA	0
ADOCBLPS	2.69e-05
H2MPTR2	4.05e-05
PRATPP	0.008308
OMMBZH2	2.69e-05
ADMDCr	0
PGPP180	0.000117778
EX_DM_5dr1p	8.08e-05
3HAD140	0
PGPP181	0.00191544
TMPKr	2.69e-05
3HAD141	0.0135896
EX_h2o2_e	0
EX_asp_L_e	0
EX_DM_trnaleu	-0.0486676
DUTPDP	0.00187437
3PSMES	0.0260619
FMETTRS	0
NAtex	0.000498997
MI3PP	0
2AGPEAT160acp	0
OCOAT1r	0
ADCMS2	0
PSD181	0.00434164
PSD180	0.000266957
3OAR60	0.0136509
ADOCBIK	0
PERD	2.69e-05
H2MB4P	0.000756559
UDPACGAM	0
HACOADH121	0
E4PD	2.69e-05
CLtex	0.000606889
KDOCT	2.45e-05
3OAR160	0
ADSL1r	0.0265113
3OAR161	0.0135896
PHYNS2	4.74e-05
PGI	0.126032
HFACOAE60	0
PGK	0.452108
GF6PTAr	0.00411814
UAMAGS	1.23e-05
PGM	0.452108
MMPTC	14.9
MG2tex	0.00101148
MPTAT	2.69e-05
FUMtex	0
EX_cl_e	-0.000606889
LPLIP1AGPC160	0
PPBNGS	0.000430781
PAPR	0.00723874
PYRt2rpp	0
PSP_D	0
MALCOATE	0
OCMPH2	2.69e-05
PIt2rpp	0.0857284
PSP_L	0
SPMS	0
FACOAE180	0.000785174
EX_pi_e	-0.0857284
UGMDDS	1.23e-05
OCBT	0.0295487
MNtex	0.000404592
HEMEOS	2.69e-05
BDH	0
G5SD	0.0381102
AGPR	0.035112
3OAR140	4.9e-05
3OAR141	0.0135896
EX_ribona_e	0
OHPHM	2.69e-05
GALCDARABtex	0
O2tex	22.3617
ARABAtex	0
MAN1PT	0
ADSL2r	0.0330767
TALA	-0.0320581
AGPAT161	0.000409999
3HAD60	0.0136509
PGCDr	0
AGPAT160	0.000406777
GTHPp	0
FACOAE160	0.000813553
PDH	0.620434
3OAR120	6.13e-05
ILETA	0.0255715
3OAR121	0.0135896
MTAP	0
EX_k_e	-0.0226167
H2Otex	-26.4282
DAPE	0.0315876
ASPK	0.646489
EX_DM_h2mpt	-4.05e-05
NO3tex	1.19931
EX_xyl_D_e	0
HMPK1	0
Htex	2.12496
PDX5PO	2.69e-05
UPP3MT2	5.38e-05
FORtex	0
GTHOr	0
ACS2	0
AGPAT180	0.000392587
G5SADr	0.0381102
AGPAT181	0.00638478
EX_etoh_e	0
UAPGR	1.23e-05
NDPK8	0.00187437
NDPK7	0.00595082
ATPS4rpp	23.0751
3HAD80	0.0136509
NDPK5	0.00407645
NDPK4	0.0766884
NDPK3	0.00245132
FACOAE140	0
NDPK2	0.072503
NDPK1	0.0373352
CA2NAtpp	0.000498997
METACH	0.00695754
GGTT	2.69e-05
ANPRT	7.41e-05
AKGt2rpp	0
EX_12ppd_S_e	0
HFACOAE80	0
3OAR100	0.0136509
MECDPS	0.000756559
GLNS	1.54899
F6PPKL	0.0581334
Zn2tex	0.000404592
MG2uabcpp	0.00101148
ACOATA	0.0136509
EX_fald_e	0
EX_nh4_e	0
MOHMT	2.69e-05
CMBLD2	0
5DGLCNtex	0
AGDC_r	0
HCO3E	1.19272
CMBLD4	0
CMBLD3	0
OXAFORtpp	0
EX_na1_e	-0.000498997
EX_oxa_e	0
PHYNDH2	4.74e-05
QULNS	0.000841876
GLUCYS	2.69e-05
EX_glc_e	0
IGPDH	0.008308
ICDHyr	0.141032
MACACI	0
FORMMFRHD	14.9
R3HAD40	0.0136509
ENCOAI141	0
ENCOAI142	0
ACGLCAM	0
ARGSSr	0.0295487
FACOAE60	0
ACOAD161	0
UMPK	0.0215463
PRASCS	0.0330767
ASNS1	0
SDPTA	0.0315876
TPI	0.231056
PSSA181	0.00446934
PSSA180	0.000274809
NH4tpp	0
TRE6PP	0.00435513
TRE6PS	0.00435513
THRPD	2.69e-05
ACBIPGT	2.69e-05
MAN6PI	0
THRPS	2.69e-05
MESACOAH	1.03337
LPLIPAL1C180	0
ADCYRS	2.69e-05
LPLIPAL1C181	0
EX_DM_trnacys	-0.000119654
EX_no3_e	-1.19931
ETOHDH	0
ARGSL	0.0295487
PTHPS	0
ENCOAI121	0
ASPTRNAAMT	0.0306154
EX_o2_e	-22.3617
ACODA	0
ENCOAI122	0
RZ5PP	0
ASPTRS	0.03038
NNAMr	0
UDPG4E	0
ACGS	0
ACOAD181	0
Ktex	0.0226167
HACOADH181	0
HACOADH180	0
HTHRPD	2.69e-05
ACGK	0.035112
FACOAE80	0
CMPKDOT2	1.23e-05
CMPKDOT1	1.23e-05
HEMEDS2	2.69e-05
SPODM	0
PSSA161	0.000287003
PSSA160	0.000284742
GLYCOX3	0
GLYCOX4	0
OXAtex	0
PPNCL2	2.69e-05
GLYCOX5	2.69e-05
UHGADA	2.45e-05
THRS	0.607944
BB_RMN	0.0748141
METSr	0.0074023
EX_DM_trnahis	-0.008308
THRA	0.544626
LPLIPAL1C161	0
HMBS	0.000107695
CYSTL	0
CYSSr	0.000200425
ACOAD121	0
CBIAT	0
FMNAT	2.69e-05
ENCOAI101	0
PGLYCP	0
KARA2	0.0255715
HACOADH160	0
HACOADH161	0
DHPS2	1e-05
SADT	0.00723874
PC20M	2.69e-05
KARA1	0.100192
2DRIBOAtex	0
IPPMIb	0.0486676
G1PTT	0.0748141
SKMK	0.0260619
EX_fum_e	0
PC6AR	2.69e-05
3OAR181	0.0127696
GLYCK2	2.27425
H2O2tpp	-0.0223905
H2MB4PRD2	0.000600562
EX_DM_trnapro	-0.0381102
U23GAAT	2.45e-05
THMBTHIC	2.69e-05
ACOAD141	0
DPR	2.69e-05
SERGLXAT	2.27425
EX_2kdrib_e	0
3OAR180	0
HACOADH141	0
5DGLCNt2rpp	0
MPTFALDA	14.9
3HBCD	0
PMDPHT	6.73e-05
CO2tex	-9.97384
NTD10	0
NTD11	0
EX_lyxnt_e	0
ACKr	0.551836
ACLS	0.100192
FALDtpp	14.9
HSDyi	0.614901
ATPPRTr	0.008308
NNDPR	0.000841876
NO3Ras	0
EX_DM_trnaarg	-0.0295487
PPTT	2.69e-05
PTRCtex	0
GLUSy	1.32208
LPLIPAL2E180	0
EX_succ_e	0
LPLIPAL2E181	0
PIuabcpp	0
THMBIOS	2.69e-05
FE2t2pp	0.000984361
NNATr	0.000841876
EX_DM_trnalys	-0.0315754
ARAB_Dtex	0
ALDD2y	0.544626
HPTRED	0
PHYNDH2_e	0
MPTSA	5.38e-05
TRDR	0.0191404
FE2abcpp	0
ZCARDS_e	0
3OAS100	0.0136509
PGAMT	-0.00411814
OMBZLM	2.69e-05
ETHMALCOAEPM	1.03337
RBFK	6.73e-05
MNt2pp	0.000404592
HBZOPT	2.69e-05
LPLIPAL2E160	0
DHNPA2	1e-05
LPLIPAL2E161	0
PHYNDH	4.74e-05
EX_DM_trnatyr	-0.00925475
EX_lyx_L_e	0
CHRPL	2.69e-05
SERAT	0.000200425
PPCOAC	1.03337
H2O2syn	0
TYRTRS	0.00925475
2AGPEAT181acp	0
PMANM	0
NTD9	0
HFACOAE180	0
NTD7	-0.000444757
EX_DM_rbrdxOX	0
L_LACtex	0
UDPDPS5	7.4e-06
UDPDPS6	7.4e-06
UDPDPS3	7.4e-06
ENO	1.82215
UDPDPS4	7.4e-06
MME	1.03337
CYRDAAT	2.69e-05
H2Otpp	-11.4834
UDPDPS9	7.4e-06
UDPDPS7	7.4e-06
GHMT2r	2.64111
UDPDPS8	7.4e-06
3OAS121	0.0135896
3OAS120	6.13e-05
MMM2r	1.03337
AACOAR	0.0340078
ADOCBLPPA	2.69e-05
ECOAH5	-0.00159873
ECOAH6	-0.00159873
BB_ACGAM	0.0040691
ECOAH3	-0.00159873
ECOAH4	-0.00159873
AOXSr	2.69e-05
GARFT	0.0331037
ECOAH7	-0.00159873
COBS2	0
ECOAH8	-0.000785174
EX_DM_trnaasn	-0.0306154
ECOAH1	1.03497
ECOAH2	-0.00159873
EX_DM_trnaasp	-0.03038
CO2tpp	-9.97384
FMNDESTRUC	1.35e-05
TDPGDH	0.0748141
PHETA1	0.0166692
HISTP	0.008308
ADCS	1e-05
GALU	0.0468631
CCRC	1.03337
IPPS2	0.0486676
HISTRS	0.008308
ACOAD2f	-0.00159873
CU2abctpp	0.000404592
MMAtex	0
PEMT160	0
HACYLCOAEPI80	0
ADCL	1e-05
PEMT161	0
EX_etha_e	0
CTPS2	0.0166166
ACHBS	0.0255715
ORNTAC	0.035112
EX_ptrc_e	0
ACOAD3f	-0.00159873
DMATT	0.000155996
FDHr	12.1753
ETMAt_e	0
AROGDH	0
GTPCI	1e-05
SO4tex	0.00773774
LDH_D3	0
HSPMDS	0
HSPMS	0
DCTPD	0.00187437
BIOTINS	2.69e-05
PAPPT3	1.23e-05
COBALT2tex	2.69e-05
PAPPT1	0
HISTD	0.008308
DVPCLPHVR	0
UQCYOR_2p	0
EX_galcDaraba_e	0
EX_arab_L_e	0
ACOAD1f	0
SULR	0.00723874
G1PACT	0.00411814
DMQMT2	2.69e-05
ANS	7.41e-05
MSUCCCOADH	1.03337
NTPP7	0
NIGOSH	0
NTPP8	0
ACOAD6f	-0.00159873
NTPP3	0
NTPP4	0
UAGCVT	1.23e-05
CU2tex	0.000404592
NTPP5	0
NTPP6	0
HFACOAE120	0
EAR121y	0.0135896
ALAALAr	1.23e-05
FALDtex	0
ECOAH181	0
GLYKr	0
EX_mn2_e	-0.000404592
DGK1	0
ACOAD7f	-0.00159873
3OAS180	0
3OAS181	0.0127696
NAPRTr	-2.69e-05
NADH11	7.67688
HACYLCOAEPI40	0
FACOAE120	0
DHAtex	0
PNTK	2.69e-05
PHOTOSYS1C	0
OMPDC	0.0215217
H2O2tex	0
SERTRS	0.0380194
Kt3pp	0
ACOAD4f	-0.00159873
CO2DAMR	2.69e-05
AMMQT8_2	0
CO2DAMS	0
CYOD	0
EX_glu_L_e	0
HFACOAE100	0
EX_DM_oxEA	0
GRTT	0.000155996
THDPS	0.0315876
PRPPS	0.063957
EAR180y	0
DAPDC	0.0315754
CREAH	0
EX_zn2_e	-0.000404592
A5PISO	-2.45e-05
KAS14	0.0136509
SHCHF	2.69e-05
ACOAD5f	-0.00159873
CS	0.141032
MDH	-0.119219
PROTRS	0.0381102
BPNT	0.00723874
HACYLCOAEPI60	0
3OAS60	0.0136509
ECOAH161	0
FACOAE100	0
NFORGLUAH	0
TDPDRR	0.0748141
EX_mal_L_e	0
HFACOAE160	0
ACACtex	0
TDPDRE	0.0748141
ARBtex	0
MTHFR3	0.0074023
OMCDC	0.0486676
EX_cit_e	0
DPGM	0
GLYD	2.27425
O2tpp	7.46167
MEOHtex	0
ACCOACr	0.108306
EX_glcn_e	0
DHAD2	0.0255715
GLYOX	0
DHAD1	0.100192
DASYN160	0.000406777
3OAS140	4.9e-05
BTS6	2.69e-05
3OAS141	0.0135896
DASYN161	0.000409999
NH4tex	0
MALCOAL	1.24087
ECOAH141	0
SULFOX2	0
3OAS80	0.0136509
EX_tartr_L_e	0
MALCOAS	1.24087
EX_2driboa_e	0
OCTDPS2	2.69e-05
PRAGSr	0.0331037
MPTSS	2.69e-05
MPTSP	2.69e-05
HFACOAE140	0
UDPGCGT	0
EX_DM_trnaser	-0.0380194
UAGPT3	1.23e-05
FT	7.4e-06
ACOAD8f	-0.000785174
EX_cobalt2_e	-2.69e-05
LPADSS	1.23e-05
GLYO1	0
DHDPS	0.0315876
GLCNtex	0
GLUR	0.13533
GK1	0.0149004
MCOATA	0.108252
CELLS	0.042508
EX_mma_e	0
EAR120y	6.13e-05
ASPTRS_tASN	0.0306154
SDACT	8.08e-05
SPMDAT1	0
SUCCtex	0
EX_DM_trnamet	-0.0069037
OHPBAT	2.69e-05
DASYN180	0.000392587
ZNabcpp	0.000404592
NTPP1	0
NTPP2	0
DASYN181	0.00638478
GALCDARABAtex	0
RBFSa	0.000134619
3OAS160	0
3OAS161	0.0135896
EAR100y	6.13e-05
RBFSb	6.73e-05
ECOAH121	0
DADK	0
Biomass_Mextorquens_AM1_core	0.122604
EX_ch4_e	-14.9
CH4tex	14.9
PMMOipp	14.9
PMMODCipp	0
ALDD1	0
N2trpp	0
N2tex	0
EX_n2_e	0
EX_no2_e	0
NO2tex	0
SAMMOi	0
NO3t7pp	1.19931
NO3R1	1.19931
NTRIR2x	1.19931
PAMMOipp	0
HAMtpp	0
NO2tpp	1.19931
NORZ2	0
NIT_mc	0
SMMOi	0
CH4trpp	0
ANHMK	0
METSOXR2	0
NADPHQR2	6.35654
QRr	0
UACMAMO	0
NDPK6	0
NDPK9	0
NDPK10	0
LIPOS	0
GTHRDHpp	0
PPS	0
ORNTA	0
CLPNS160	0
CLPNS161	0
CLPNS180	0
CLPNS181	0
SHSL2	0
XPPT	0
MSAR	0
BACCL	0
HGNTOR	0
34HPPOR	0
FTHFCL	0
CPPPGO2	0
GLUDy	0
GLUDxi	0
UDPGDC	0
HCITS	0
TRPAS2	0.323244
NTPTP1	0
HOPNTAL	0
CCGS	0
DAAD	0
HMGL	0
HEX7	0
LIPOCT	0
PFK_ppi	0
PFK	0
SQLC	0
SQLC2	0
ACM6PH	0
CHOLD	0
TMDS3	0.00187437
OXADC	0
METGL	0
UREA	0
SCYSDS	0
MOCDS	0
MCITD	0
NMNS	0
DHCYTCPEROX	0.0223905
PPK2	0
HAMR	0
HAORipp	0
ACSPW	0.620434
PC	0
LYSDC	0
CADVt	0
DM_lys_L_e	0
EX_15dap_e	0
DM_15dap_c	0

## Sheet: MCMC sampling in AMS medium
EAOXRED	0.000122766
IMPC	0.0536224
HACD8i	0.00743508
PANTS	3.49e-05
IMPD	0.0192716
OCPPH3	3.49e-05
PGSA161	0.000159367
LCAD	0
PGSA160	0.000158121
PPAtex	0
DTMPK	0.0282252
PPND	0.0120263
DXPRIi	0.000980278
PC11M	3.49e-05
PSERTr	0.217801
CAT	0.0252346
CYO_2p	15.6978
UAMAS	1.59e-05
MNEUROPNDH3	6.14e-05
EX_DM_trnathr	-0.0488728
MNEUROPNDH2	6.14e-05
2AGPEAT161acp	0
PEPGLYCANGT	1.59e-05
MTHFC	3.59123
MTHFD	3.59123
THRD_L	0.0331331
EAR60y	0.021235
CDPMEK	0.000980278
PGMT	-0.157658
PGSA181	0.00248185
PItex	0.111079
ASPCTr	0.0278859
MALtex	0
CYTK1	0.0350175
SUCCOAH	0.152628
HNEUROPNMT2	0
2AGPEAT180acp	0
HNEUROPNMT3	0
HNEUROPNMT4	0
DHPPDA2	8.72e-05
PGSA180	0.000152606
CITtex	0
PHYNDH_e	0
HNEUROPNMT6	6.14e-05
HNEUROPNMT5	6.14e-05
GLYCL_3	0
EX_ac_e	0
EX_etma_e	0
EDTXS1	1.59e-05
PRE3BS	3.49e-05
HACD1	-6.67278
HACD2	0.00147601
HACD5	0.00147601
HACD6	0.00147601
HACD3	0.00147601
MTRI2	0
HACD4	0.00147601
ARGTRS	0.0382865
AACPS3	0.0310639
AACPS4	0.0239097
SHK3Dr	-0.0337686
AACPS5	0.0244698
AACPS6	0.0252486
IGPS	9.6e-05
EX_h2o_e	26.952
GLYCLTDx	-1.3e-05
SULabcpp	0.0100258
HACD7	0.00147601
SHCHD2	3.49e-05
RIBONAtex	0
ADK1	1.62623
PC6YM	3.49e-05
EX_pyr_e	0
SALMMT	0
GFUCS	0
GMPS	-0.047598
POLYPIP	0
DNTPPA	1.3e-05
MALTATr	0
ACACt2pp	0
PYRtex	0
GLUTRS	0.0437306
ATPM	3.5
FE2tex	0.00127544
GLXDH	0
MOBDMPTL	3.49e-05
HACYLCOAEPI100	0
DB4PS	0.000174427
LEUTRS	0.0630589
GLUPRT	0.0428926
HNEUROPNMT	0
PTPAT	0.0157572
DDPA	0.0337686
ASPtex	0
FBA	0.285498
HEXTT	3.49e-05
RIBtex	0
AKGDH	0.0111007
LYXtex	0
EAR181y	0.0165456
2KDRIBtex	0
ALATRS	0.175284
PC17M	3.49e-05
HSERTA	0.00901493
TKT1	0.0415379
LPLIPAL2C161	0
CCR	0.0546415
PHETRS	0.0215984
P5CR	0.101314
EX_5dglcn_e	0
ACACT7r	0.00147601
ACACT5r	0.00147601
P5CD	0.0646642
ETFDH	1.48492
PYAM5POr	0
LYSTRS	0.0409124
EAR141y	0.0176081
UDPGLCUREPI	0
PC8XM	3.49e-05
ACACT6r	0.00147601
FBP	0.964574
DALAOX	0.0180813
EX_for_e	0
KAT8	0.00743508
DHAtpp	0
EAR140y	0.00354749
ADCPS2	3.49e-05
LPLIPAL2C181	0
EAR80y	0.021235
LPLIPAL2C180	0
EX_h_e	-0.475757
MOBDabcpp	0.000559118
DHORD	0.0278859
EAR160y	0.00354749
PEMT181	0
PEMT180	0
SOTA	0
APRAUR	8.72e-05
CA2tex	0.0014329
ACACT4r	0.00147601
AICART	0.0536224
NADS1	-0.0489708
HACYLCOAEPI140	0
NADS2	0.0500616
HPPK2	1.3e-05
COBALT2tpp	3.49e-05
RNDR3	0.00771051
ENCOAI81	0
RNDR2	0.00528189
UAGDP	0.0053359
PDX5PS2	3.49e-05
RNDR1	0.00242863
AKGtex	0
PUNP8	0
L_LALDtex	0
PUNP9	0.000104656
L_LACt2rpp	0
EAR40y	0.021235
ALAGLUEPI	0
GPDDA1	0
GPDDA2	-4.52e-35
DAHETBCLPHDDH	0
PUNP7	0
EX_DM_trnaala	-0.175284
GLNTRAT	0.0440673
ACACT3r	0.00147601
EX_DM_trnaile	-0.0331331
EX_photon_e	0
DCAtex	0
3HBCDH	4.78055
GCALDDr	1.3e-05
ACACT2r	0.00147601
PPNDH	0.0215984
EX_xylnt_D_e	0
FPGS8	0
ACtex	0
AHC	0.000576275
ALATA_D	0.193413
ZCARDS2	6.14e-05
ADSK	0.0202692
GTPCII2	8.72e-05
HACYLCOAEPI120	0
LYXNTtex	0
ENCOAI61	0
TDSK	1.59e-05
APG3PAT160	0.000527063
ACALDtpp	0
APG3PAT161	0.000531238
ADSS	0.0343508
FACOAL60	0.0237505
EX_DM_AMOB	3.49e-05
ACACT1r	1.52751
GLUTRS_Gln_	0.0440673
CYOO_4p	0.718173
MEOHDH	14.8879
PHYNS	6.14e-05
CDPGD	0
G2PP	0
TRPS1r	0.0250944
OPHBDC	3.49e-05
ENCOAI41	0
TSULtex	0
SORBNLDH	0
APG3PAT180	0.000508677
APG3PAT181	0.00827279
APH181	0.0244698
ACPpds	0.0157223
EX_rib_D_e	0
CHORS	0.0337686
APH180	0.0326836
CHORM	0.0336247
SUCOAS	0.0733179
FACOAL80	0.0245875
5DGLCNR	0
PPDK	0.0496407
BTCAL	0
H2MB4PRD	0.000202125
GTHS	3.49e-05
XYLNTtex	0
APH161	0.0239097
TRPS3r	-0.0249985
ADPT	0.000104656
EX_DM_trnatrp	-9.6e-05
CATetoh	0
ACS	0.0365828
MREDR	0
PPPGO	6.98e-05
USHD	1.59e-05
ZCARDS	6.14e-05
EX_ca2_e	-0.000786349
APH160	0.0251049
UAGAAT	3.18e-05
CA2abctpp	0.0014329
HSTPTr	0.0107647
ZCARDS2_e	0
EX_lald_L_e_	0
TRPTRS	9.6e-05
PROD2	0.0519347
DHORTS	0.0278859
MOGDS	3.49e-05
EAR161y	0.0176081
CYSTRS	0.000155036
3HAD121	0.0176081
3HAD120	0.00362692
IPMD2r	0.0630589
FCLPA	0
EX_dca_e	0
COCHL	3.49e-05
CPPPGO	6.98e-05
EX_galcDarab_e	0
HISTDADH	0.0107647
EX_tsul_e	0
ASPTA	-0.488402
KAT141	0
TARTRtex	0
PSD161	0.000361244
GLU5K	0.0551671
PSD160	0.000358401
TARTR_Ltpp	0
DXPS	0.00101516
FACOAL121	0
FACOAL120	0.0246945
VALTRS	0.0667253
EX_D_araba_e	0
PHAS	1.41873
EX_mg2_e	-0.00131058
SUCCD1	1.49491
MEPCT	0.000980278
EX_lac_L_e	0
METAT	0.000750702
ETOHtex	0
3HAD100	0.021235
FRDOr	0.0499008
THRTRS	0.0488728
EX_co2_e	8.50502
TMPPP	3.49e-05
KAT121	0
HACDHG	0
PRMICI	0.0107647
EX_araba_e	0
VALTA	0.0667253
FCLT	6.98e-05
PRFGS	0.0428926
MFPGS5	0
TYRTA	0.0120263
T2DECAI	0.0176081
THMBIOS2	3.49e-05
THMBIOS3	3.49e-05
THMBIOS4	3.49e-05
PPCDC	3.49e-05
FACOAL100	0.0249471
PPA2	0.0481099
RPI	-0.0413317
DHXANTI	0
EX_DM_trnaphe	-0.0215984
ORPT	0.0278859
DHXANTH	0
GMPS2	0.0668696
PYK	-1.60442
RPE	-0.0415379
PTA2	0
ASAD	0.264863
ACPS1	0.0157223
FMNRx2	-5.23e-05
HACOAEPI141	0
BMMALCOAL	1.48492
EX_DM_thif	-9.03e-21
PRAMPC	0.0107647
FUM	1.6104
EX_fe2_e	-0.00127544
EX_acac_e	0
EX_DM_thil	-2e-20
KAT181	0
HGBAMS	3.49e-05
DHDPRy	0.0409283
EX_DM_trnagln	-0.0440673
BRFAPS	0
EX_DM_this	-2.25e-21
EX_ppa_e	0
LPLIPAL1E181	0
LEUTAi	0.0630589
EX_DM_trnaglu	-0.0437306
ACONT	0.193837
EX_DM_trnagly	-0.186262
FPGS10	0
ENCOAI162	0
FACOAL161	0
ENCOAI161	0
FACOAL160	0.0244715
NNDMBRT	3.49e-05
ALAR	-0.1753
ALAS	0.00111633
ORNDC	0.00720836
NADK	0.000387939
EX_cu2_e	-0.000524233
DBTSr	3.49e-05
GLUtex	0
HACOAEPI121	0
GAPD	-0.585799
CU2abcpp	0.0242591
KDOPS	3.18e-05
GLYAMDTRc	0
UPP3S	0.000139541
UPP3MT	6.98e-05
KDOPP	3.18e-05
THD2pp	0.181244
EX_so4_e	-0.0100258
ETHMALCOAM	1.48492
LPLIPAL1E160	0
LPLIPAL1E161	0
KAT161	0
HSK	0.21492
EX_glyclt_e	0
MLMPTDHy	3.83195
PHBD2	1.37467
ENCOAI182	0
FACOAL141	0
ENCOAI181	0
FRTT	0.000157651
FACOAL140	0.0243
ASP1DC	3.49e-05
DHQS	0.0337686
CBPS	0.0661723
LDH_L	0
ETHAtex	0
THZS	3.49e-05
DNMPPA	1.3e-05
EX_mobd_e	-0.000559118
DHQD	0.0337686
CLt4	0.000786349
GLYTRS	0.186262
Kabcpp	0.0676233
PPAt7	0
MALDHDC	0.0495047
HNEUROPNS2	6.14e-05
EX_dha_e	0
HNEUROPNS1	6.14e-05
ACPPAT181	0.0327426
UAAGDS	1.59e-05
SDPDS	0.0409283
HACOAEPI181	0
MCPST	0
ACPPAT180	0.0331923
AIRCr	0.0428577
IG3PS	0.0107647
MOBDtex	0.000559118
GLYCLTtex	0
ACOTA	-0.104372
TMDS	0
PRAIS	0.0428926
ANACMURLALAA	0
UPPDC1	6.98e-05
ARABA_Dtex	0
EX_arab_D_e	0
SPOTN	3.49e-05
3OAR40	0.021235
XYLtex	0
SSALyr	0
UDPGDr	0
DTPCUDCPPP	1.59e-05
PPC	1.31304
PPA	1.25682
BTCOAC	0.124343
3HAD181	0.0165456
PPDODH	0
3HAD180	0.00845244
ACPPAT161	0.024441
ACPPAT160	0.0256319
HACOAEPI161	0
MLMPTDH	11.0559
PRAI	9.6e-05
CBLAT	0
DPCOAK	0.0157572
FTHFL	3.68774
EX_akg_e	0
ILETRS	0.0331331
ASPO6	0.00109082
PRE5MT	3.49e-05
FACOAL180	0.0305466
FACOAL181	0
FALDHp	0
TRSARr	0
DHOANTC	0
PRBK	0
LPLIP2AGPC160	0
DHFS	1.3e-05
PGPP160	0.000158121
DHFR	1.3e-05
EX_meoh_e	0
PGPP161	0.000159367
3HAD160	0.00354749
3HAD161	0.0176081
LGTHL	0
PTAr	-0.218089
FMFTFMPT	14.8879
PMPK	3.49e-05
GMAND	0
G3PD2	0.0127917
12PPDStex	0
3OAR80	0.021235
METTRS	0.00894516
TRPS2	0.0250746
AMAOTr	3.49e-05
FALDA	0
ADOCBLPS	1.7e-05
H2MPTR2	5.24e-05
PRATPP	0.0107647
OMMBZH2	3.49e-05
ADMDCr	0
PGPP180	0.000152606
EX_DM_5dr1p	0.000104656
3HAD140	0.00354749
PGPP181	0.00248185
TMPKr	3.49e-05
3HAD141	0.0176081
EX_h2o2_e	0
EX_asp_L_e	0
EX_DM_trnaleu	-0.0630589
DUTPDP	0.00242863
3PSMES	0.0337686
FMETTRS	0
NAtex	0.000646554
MI3PP	0
2AGPEAT160acp	-3.59e-16
OCOAT1r	1.37467
ADCMS2	0
PSD181	0.0056255
PSD180	0.000345898
3OAR60	0.021235
ADOCBIK	0
PERD	3.49e-05
H2MB4P	0.000980278
UDPACGAM	0
HACOADH121	0
E4PD	3.49e-05
CLtex	0.000786349
KDOCT	3.18e-05
3OAR160	0.00354749
ADSL1r	0.0343508
3OAR161	0.0176081
PHYNS2	6.14e-05
PGI	0.163301
HFACOAE60	0
PGK	0.585799
GF6PTAr	0.0053359
UAMAGS	1.59e-05
PGM	0.8036
MMPTC	14.8879
MG2tex	0.00131058
MPTAT	3.49e-05
FUMtex	0
EX_cl_e	-0.000786349
LPLIP1AGPC160	0
PPBNGS	0.000558165
PAPR	0.0202692
PYRt2rpp	0
PSP_D	0
MALCOATE	0.0472991
OCMPH2	3.49e-05
PIt2rpp	0.0689509
PSP_L	0.217801
SPMS	0
FACOAE180	0.0231116
EX_pi_e	-0.111079
UGMDDS	1.59e-05
OCBT	0.0382865
MNtex	0.000524233
HEMEOS	3.49e-05
BDH	1.37467
G5SD	0.0551671
AGPR	0.104372
3OAR140	0.00361104
3OAR141	0.0176081
EX_ribona_e	0
OHPHM	3.49e-05
GALCDARABtex	0
O2tex	23.3731
ARABAtex	0
MAN1PT	0
ADSL2r	0.0428577
TALA	-0.0415379
AGPAT161	0.000531238
3HAD60	0.021235
PGCDr	0.217801
AGPAT160	0.000527063
GTHPp	0.0171977
FACOAE160	0.0304306
PDH	1.09585
3OAR120	0.00362692
ILETA	0.0331331
3OAR121	0.0176081
MTAP	0
EX_k_e	-0.0293046
H2Otex	-26.952
DAPE	0.0409283
ASPK	0.264863
EX_DM_h2mpt	-5.24e-05
NO3tex	0
EX_xyl_D_e	0
HMPK1	0
Htex	0.475757
PDX5PO	3.49e-05
UPP3MT2	6.98e-05
FORtex	0
GTHOr	0.0171977
ACS2	0
AGPAT180	0.000508677
G5SADr	0.114044
AGPAT181	0.00827279
EX_etoh_e	0
UAPGR	1.59e-05
NDPK8	0.0274676
NDPK7	0.00771051
ATPS4rpp	29.6619
3HAD80	0.021235
NDPK5	0.0293839
NDPK4	0.125162
NDPK3	0.027307
FACOAE140	0.0243
NDPK2	0.118357
NDPK1	0.0728888
CA2NAtpp	0.000646554
METACH	0.00901493
GGTT	3.49e-05
ANPRT	9.6e-05
AKGt2rpp	0
EX_12ppd_S_e	0
HFACOAE80	0
3OAR100	0.021235
MECDPS	0.000980278
GLNS	1.82557
F6PPKL	0.0753239
Zn2tex	0.000524233
MG2uabcpp	0.00131058
ACOATA	0.021235
EX_fald_e	0
EX_nh4_e	-1.68567
MOHMT	3.49e-05
CMBLD2	0
5DGLCNtex	0
AGDC_r	0
HCO3E	1.84902
CMBLD4	0
CMBLD3	0
OXAFORtpp	0
EX_na1_e	-0.000646554
EX_oxa_e	0
PHYNDH2	6.14e-05
QULNS	0.00109082
GLUCYS	3.49e-05
EX_glc_e	0
IGPDH	0.0107647
ICDHyr	0.193837
MACACI	0
FORMMFRHD	14.8879
R3HAD40	0.021235
ENCOAI141	0
ENCOAI142	0
ACGLCAM	0
ARGSSr	0.0382865
FACOAE60	0.0237505
ACOAD161	0
UMPK	0.0523323
PRASCS	0.0428577
ASNS1	0
SDPTA	0.0409283
TPI	0.299381
PSSA181	0.00579095
PSSA180	0.000356071
NH4tpp	1.55569
TRE6PP	0.00564297
TRE6PS	0.00564297
THRPD	3.49e-05
ACBIPGT	3.49e-05
MAN6PI	0
THRPS	3.49e-05
MESACOAH	1.48492
LPLIPAL1C180	0
ADCYRS	3.49e-05
LPLIPAL1C181	0
EX_DM_trnacys	-0.000155036
EX_no3_e	0
ETOHDH	0
ARGSL	0.0382865
PTHPS	0
ENCOAI121	0
ASPTRNAAMT	0.0396686
EX_o2_e	-23.3731
ACODA	0.0371273
ENCOAI122	0
RZ5PP	1.79e-05
ASPTRS	0.0393635
NNAMr	0
UDPG4E	0
ACGS	0.0371273
ACOAD181	0
Ktex	0.0293046
HACOADH181	0
HACOADH180	0
HTHRPD	3.49e-05
ACGK	0.104372
FACOAE80	0.0245875
CMPKDOT2	1.59e-05
CMPKDOT1	1.59e-05
HEMEDS2	3.49e-05
SPODM	0
PSSA161	0.000371871
PSSA160	0.000368942
GLYCOX3	0
GLYCOX4	0
OXAtex	0
PPNCL2	3.49e-05
GLYCOX5	3.49e-05
UHGADA	3.18e-05
THRS	0.21492
BB_RMN	0.096937
METSr	0.00959121
EX_DM_trnahis	-0.0107647
THRA	0.132879
LPLIPAL1C161	0
HMBS	0.000139541
CYSTL	0
CYSSr	0.000259692
ACOAD121	0
CBIAT	0
FMNAT	3.49e-05
ENCOAI101	0
PGLYCP	0
KARA2	0.0331331
HACOADH160	0
HACOADH161	0
DHPS2	1.3e-05
SADT	0.0202692
PC20M	3.49e-05
KARA1	0.129819
2DRIBOAtex	0
IPPMIb	0.0630589
G1PTT	0.096937
SKMK	0.0337686
EX_fum_e	0
PC6AR	3.49e-05
3OAR181	0.0165456
GLYCK2	3.6904
H2O2tpp	-0.0505465
H2MB4PRD2	0.000778152
EX_DM_trnapro	-0.0493796
U23GAAT	3.18e-05
THMBTHIC	3.49e-05
ACOAD141	0
DPR	3.49e-05
SERGLXAT	3.6904
EX_2kdrib_e	0
3OAR180	0.00845244
HACOADH141	0
5DGLCNt2rpp	0
MPTFALDA	14.8879
3HBCD	0.506148
PMDPHT	8.72e-05
CO2tex	-8.50502
NTD10	0
NTD11	0
EX_lyxnt_e	0
ACKr	0.142765
ACLS	0.129819
FALDtpp	14.8879
HSDyi	0.223935
ATPPRTr	0.0107647
NNDPR	0.00109082
NO3Ras	0
EX_DM_trnaarg	-0.0382865
PPTT	3.49e-05
PTRCtex	0
GLUSy	1.43499
LPLIPAL2E180	0
EX_succ_e	0
LPLIPAL2E181	0
PIuabcpp	0.0421279
THMBIOS	3.49e-05
FE2t2pp	0.000788214
NNATr	0.00109082
EX_DM_trnalys	-0.0409124
ARAB_Dtex	0
ALDD2y	0.132879
HPTRED	0
PHYNDH2_e	0
MPTSA	6.98e-05
TRDR	0.0356903
FE2abcpp	0.000487229
ZCARDS_e	0
3OAS100	0.021235
PGAMT	-0.0053359
OMBZLM	3.49e-05
ETHMALCOAEPM	1.48492
RBFK	8.72e-05
MNt2pp	0.000524233
HBZOPT	3.49e-05
LPLIPAL2E160	-4.52e-35
DHNPA2	1.3e-05
LPLIPAL2E161	0
PHYNDH	6.14e-05
EX_DM_trnatyr	-0.0119914
EX_lyx_L_e	0
CHRPL	3.49e-05
SERAT	0.000259692
PPCOAC	1.48492
H2O2syn	0.0292716
TYRTRS	0.0119914
2AGPEAT181acp	0
PMANM	0
NTD9	0
HFACOAE180	0
NTD7	-0.000576275
EX_DM_rbrdxOX	0
L_LACtex	0
UDPDPS5	9.59e-06
UDPDPS6	9.59e-06
UDPDPS3	9.59e-06
ENO	2.8868
UDPDPS4	9.59e-06
MME	1.48492
CYRDAAT	3.49e-05
H2Otpp	-11.9735
UDPDPS9	9.59e-06
UDPDPS7	9.59e-06
GHMT2r	3.57917
UDPDPS8	9.59e-06
3OAS121	0.0176081
3OAS120	0.00362692
MMM2r	1.48492
AACOAR	1.00995
ADOCBLPPA	1.7e-05
ECOAH5	0.00147601
ECOAH6	0.00147601
BB_ACGAM	0.00527235
ECOAH3	0.00147601
ECOAH4	0.00147601
AOXSr	3.49e-05
GARFT	0.0428926
ECOAH7	0.00147601
COBS2	1.79e-05
ECOAH8	0.00743508
EX_DM_trnaasn	-0.0396686
ECOAH1	0.9773
ECOAH2	0.00147601
EX_DM_trnaasp	-0.0393635
CO2tpp	-8.50502
FMNDESTRUC	1.74e-05
TDPGDH	0.096937
PHETA1	0.0215984
HISTP	0.0107647
ADCS	1.3e-05
GALU	0.0607208
CCRC	1.36058
IPPS2	0.0630589
HISTRS	0.0107647
ACOAD2f	0.00147601
CU2abctpp	0.0247833
MMAtex	0
PEMT160	0
HACYLCOAEPI80	0
ADCL	1.3e-05
PEMT161	0
EX_etha_e	0
CTPS2	0.0215302
ACHBS	0.0331331
ORNTAC	0.0672442
EX_ptrc_e	0
ACOAD3f	0.00147601
DMATT	0.000202125
FDHr	11.2004
ETMAt_e	0
AROGDH	0
GTPCI	1.3e-05
SO4tex	0.0100258
LDH_D3	0
HSPMDS	0
HSPMS	0
DCTPD	0.00242863
BIOTINS	3.49e-05
PAPPT3	1.59e-05
COBALT2tex	3.49e-05
PAPPT1	0
HISTD	0.0107647
DVPCLPHVR	0
UQCYOR_2p	0.702885
EX_galcDaraba_e	0
EX_arab_L_e	0
ACOAD1f	-0.0682258
SULR	0.00937928
G1PACT	0.0053359
DMQMT2	3.49e-05
ANS	9.6e-05
MSUCCCOADH	1.48492
NTPP7	0.0257966
NIGOSH	0
NTPP8	0.0244147
ACOAD6f	0.00147601
NTPP3	0
NTPP4	0.0241308
UAGCVT	1.59e-05
CU2tex	0.000524233
NTPP5	0.025039
NTPP6	0.0253228
HFACOAE120	0
EAR121y	0.0176081
ALAALAr	1.59e-05
FALDtex	0
ECOAH181	0
GLYKr	0
EX_mn2_e	-0.000524233
DGK1	0.024102
ACOAD7f	0.00147601
3OAS180	0.00845244
3OAS181	0.0165456
NAPRTr	-3.49e-05
NADH11	13.3937
HACYLCOAEPI40	0.914929
FACOAE120	0.0246945
DHAtex	0
PNTK	3.49e-05
PHOTOSYS1C	0.0489206
OMPDC	0.0278859
H2O2tex	0
SERTRS	0.049262
Kt3pp	0.0383187
ACOAD4f	0.00147601
CO2DAMR	3.49e-05
AMMQT8_2	0
CO2DAMS	0
CYOD	0.0401212
EX_glu_L_e	0
HFACOAE100	0
EX_DM_oxEA	-1.12e-19
GRTT	0.000202125
THDPS	0.0409283
PRPPS	0.0828695
EAR180y	0.00845244
DAPDC	0.0409124
CREAH	0
EX_zn2_e	-0.000524233
A5PISO	-3.18e-05
KAS14	0.021235
SHCHF	3.49e-05
ACOAD5f	0.00147601
CS	0.193837
MDH	-0.6308
PROTRS	0.0493796
BPNT	0.0359915
HACYLCOAEPI60	0
3OAS60	0.021235
ECOAH161	0
FACOAE100	0.0249471
NFORGLUAH	0
TDPDRR	0.096937
EX_mal_L_e	0
HFACOAE160	0
ACACtex	0
TDPDRE	0.096937
ARBtex	0
MTHFR3	0.00959121
OMCDC	0.0630589
EX_cit_e	0
DPGM	0
GLYD	3.6904
O2tpp	8.35525
MEOHtex	0
ACCOACr	0.173617
EX_glcn_e	0
DHAD2	0.0331331
GLYOX	0
DHAD1	0.129819
DASYN160	0.000527063
3OAS140	0.00361104
BTS6	3.49e-05
3OAS141	0.0176081
DASYN161	0.000531238
NH4tex	1.68567
MALCOAL	2.1917
ECOAH141	0
SULFOX2	0.0108899
3OAS80	0.021235
EX_tartr_L_e	0
MALCOAS	2.239
EX_2driboa_e	0
OCTDPS2	3.49e-05
PRAGSr	0.0428926
MPTSS	3.49e-05
MPTSP	3.49e-05
HFACOAE140	0
UDPGCGT	0
EX_DM_trnaser	-0.049262
UAGPT3	1.59e-05
FT	9.59e-06
ACOAD8f	0.00743508
EX_cobalt2_e	-3.49e-05
LPADSS	1.59e-05
GLYO1	0.0137612
DHDPS	0.0409283
GLCNtex	0
GLUR	0.193429
GK1	0.0438199
MCOATA	0.173548
CELLS	0.0550778
EX_mma_e	0
EAR120y	0.00362692
ASPTRS_tASN	0.0396686
SDACT	0.000104656
SPMDAT1	0
SUCCtex	0
EX_DM_trnamet	-0.00894516
OHPBAT	3.49e-05
DASYN180	0.000508677
ZNabcpp	0.000524233
NTPP1	0.024102
NTPP2	0.0245134
DASYN181	0.00827279
GALCDARABAtex	0
RBFSa	0.000174427
3OAS160	0.00354749
3OAS161	0.0176081
EAR100y	0.00362692
RBFSb	8.72e-05
ECOAH121	0
DADK	0.025039
Biomass_Mextorquens_AM1_core	0.158858
EX_ch4_e	-14.8879
CH4tex	14.8879
PMMOipp	14.8879
PMMODCipp	0
ALDD1	0
N2trpp	0
N2tex	0
EX_n2_e	0
EX_no2_e	0.131717
NO2tex	-0.131717
SAMMOi	0.0307292
NO3t7pp	0
NO3R1	0
NTRIR2x	0.00872591
PAMMOipp	0.129987
HAMtpp	-0.0104558
NO2tpp	0.00872591
NORZ2	0
NIT_mc	0
SMMOi	0
CH4trpp	0
ANHMK	0
METSOXR2	0
NADPHQR2	0.0486911
QRr	0.0480547
UACMAMO	0
NDPK6	0
NDPK9	0
NDPK10	0
LIPOS	0
GTHRDHpp	0
PPS	0.0486028
ORNTA	0.0588767
CLPNS160	0
CLPNS161	0
CLPNS180	0
CLPNS181	0
SHSL2	0
XPPT	0
MSAR	0
BACCL	0
HGNTOR	0
34HPPOR	0
FTHFCL	0
CPPPGO2	0
GLUDy	0.0288534
GLUDxi	0.0300233
UDPGDC	0
HCITS	0
TRPAS2	0.050073
NTPTP1	0
HOPNTAL	0
CCGS	0
DAAD	0
HMGL	0
HEX7	0
LIPOCT	0
PFK_ppi	0.679076
PFK	0
SQLC	0
SQLC2	0
ACM6PH	0
CHOLD	0
TMDS3	0.00242863
OXADC	0
METGL	0
UREA	0
SCYSDS	0
MOCDS	0
MCITD	0
NMNS	0
DHCYTCPEROX	0.0333487
PPK2	0.048075
HAMR	0.0202735
HAORipp	0.140443
ACSPW	1.09585

## Sheet: MCMC sampling in NMS medium
EAOXRED	9.02e-05
IMPC	0.0394169
HACD8i	0.0327792
PANTS	2.56e-05
IMPD	0.0141662
OCPPH3	2.56e-05
PGSA161	0.000117148
LCAD	0
PGSA160	0.000116232
PPAtex	0
DTMPK	0.0967744
PPND	0.00884033
DXPRIi	0.000720584
PC11M	2.56e-05
PSERTr	0.248585
CAT	0.0614009
CYO_2p	14.881
UAMAS	1.17e-05
MNEUROPNDH3	4.51e-05
EX_DM_trnathr	-0.0359255
MNEUROPNDH2	4.51e-05
2AGPEAT161acp	0
PEPGLYCANGT	1.17e-05
MTHFC	2.65363
MTHFD	2.65363
THRD_L	0.0243556
EAR60y	0.0276153
CDPMEK	0.000720584
PGMT	-0.115891
PGSA181	0.00182436
PItex	0.081652
ASPCTr	0.0204984
MALtex	0
CYTK1	0.103376
SUCCOAH	0.324794
HNEUROPNMT2	0
2AGPEAT180acp	0
HNEUROPNMT3	0
HNEUROPNMT4	0
DHPPDA2	6.41e-05
PGSA180	0.000112178
CITtex	0
PHYNDH_e	0
HNEUROPNMT6	4.51e-05
HNEUROPNMT5	4.51e-05
GLYCL_3	0
EX_ac_e	0
EX_etma_e	0
EDTXS1	1.17e-05
PRE3BS	2.56e-05
HACD1	-5.06654
HACD2	0.0130909
HACD5	0.0130909
HACD6	0.0130909
HACD3	0.0130909
MTRI2	0
HACD4	0.0130909
ARGTRS	0.0281437
AACPS3	0.116399
AACPS4	0.0883765
SHK3Dr	-0.0248227
AACPS5	0.0942601
AACPS6	0.0927524
IGPS	7.05e-05
EX_h2o_e	26.5126
GLYCLTDx	-9.56e-06
SULabcpp	0.00736981
HACD7	0.0130909
SHCHD2	2.56e-05
RIBONAtex	0
ADK1	2.59378
PC6YM	2.56e-05
EX_pyr_e	0
SALMMT	0
GFUCS	0
GMPS	-0.17889
POLYPIP	0
DNTPPA	9.56e-06
MALTATr	0
ACACt2pp	0
PYRtex	0
GLUTRS	0.0321455
ATPM	3.5
FE2tex	0.000937555
GLXDH	0
MOBDMPTL	2.56e-05
HACYLCOAEPI100	0
DB4PS	0.000128218
LEUTRS	0.0463534
GLUPRT	0.0315296
HNEUROPNMT	0
PTPAT	0.0614413
DDPA	0.0248227
ASPtex	0
FBA	0.209865
HEXTT	2.56e-05
RIBtex	0
AKGDH	0.0434745
LYXtex	0
EAR181y	0.0121624
2KDRIBtex	0
ALATRS	0.128848
PC17M	2.56e-05
HSERTA	0.00662671
TKT1	0.0305337
LPLIPAL2C161	0
CCR	0.230485
PHETRS	0.0158766
P5CR	0.252244
EX_5dglcn_e	0
ACACT7r	0.0130909
ACACT5r	0.0130909
P5CD	0.388364
ETFDH	1.07001
PYAM5POr	0
LYSTRS	0.030074
EAR141y	0.0129434
UDPGLCUREPI	0
PC8XM	2.56e-05
ACACT6r	0.0130909
FBP	1.76
DALAOX	0.0450416
EX_for_e	0
KAT8	0.0327792
DHAtpp	0
EAR140y	0.0146136
ADCPS2	2.56e-05
LPLIPAL2C181	0
EAR80y	0.0276153
LPLIPAL2C180	0
EX_h_e	-3.06838
MOBDabcpp	0.000410998
DHORD	0.0204984
EAR160y	0.0146136
PEMT181	0
PEMT180	0
SOTA	0
APRAUR	6.41e-05
CA2tex	0.0010533
ACACT4r	0.0130909
AICART	0.0394169
NADS1	-0.185754
HACYLCOAEPI140	0
NADS2	0.186556
HPPK2	9.56e-06
COBALT2tpp	2.56e-05
RNDR3	0.00566786
ENCOAI81	0
RNDR2	0.00388262
UAGDP	0.00392232
PDX5PS2	2.56e-05
RNDR1	0.00178524
AKGtex	0
PUNP8	0
L_LALDtex	0
PUNP9	7.69e-05
L_LACt2rpp	0
EAR40y	0.0276153
ALAGLUEPI	0
GPDDA1	0
GPDDA2	5.28e-16
DAHETBCLPHDDH	0
PUNP7	0
EX_DM_trnaala	-0.128848
GLNTRAT	0.0323931
ACACT3r	0.0130909
EX_DM_trnaile	-0.0243556
EX_photon_e	0
DCAtex	0
3HBCDH	3.67261
GCALDDr	9.56e-06
ACACT2r	0.0130909
PPNDH	0.0158766
EX_xylnt_D_e	0
FPGS8	0
ACtex	0
AHC	0.000423609
ALATA_D	0.173925
ZCARDS2	4.51e-05
ADSK	0.0350405
GTPCII2	6.41e-05
HACYLCOAEPI120	0
LYXNTtex	0
ENCOAI61	0
TDSK	1.17e-05
APG3PAT160	0.000387434
ACALDtpp	0
APG3PAT161	0.000390504
ADSS	0.0252507
FACOAL60	0.0903708
EX_DM_AMOB	2.56e-05
ACACT1r	1.08931
GLUTRS_Gln_	0.0323931
CYOO_4p	0.0933068
MEOHDH	14.8688
PHYNS	4.51e-05
CDPGD	0
G2PP	0
TRPS1r	0.109607
OPHBDC	2.56e-05
ENCOAI41	0
TSULtex	0
SORBNLDH	0
APG3PAT180	0.000373919
APG3PAT181	0.00608118
APH181	0.0942601
ACPpds	0.0614157
EX_rib_D_e	0
CHORS	0.0248227
APH180	0.125532
CHORM	0.0247169
SUCOAS	0.313528
FACOAL80	0.0880902
5DGLCNR	0
PPDK	0.191199
BTCAL	0
H2MB4PRD	0.000148579
GTHS	2.56e-05
XYLNTtex	0
APH161	0.0883765
TRPS3r	-0.109536
ADPT	7.69e-05
EX_DM_trnatrp	-7.05e-05
CATetoh	0
ACS	0.109691
MREDR	0
PPPGO	5.13e-05
USHD	1.17e-05
ZCARDS	4.51e-05
EX_ca2_e	-0.000578031
APH160	0.096711
UAGAAT	2.34e-05
CA2abctpp	0.0010533
HSTPTr	0.00791295
ZCARDS2_e	0
EX_lald_L_e_	0
TRPTRS	7.05e-05
PROD2	0.215946
DHORTS	0.0204984
MOGDS	2.56e-05
EAR161y	0.0129434
CYSTRS	0.000113964
3HAD121	0.0129434
3HAD120	0.014672
IPMD2r	0.0463534
FCLPA	0
EX_dca_e	0
COCHL	2.56e-05
CPPPGO	5.13e-05
EX_galcDarab_e	0
HISTDADH	0.00791295
EX_tsul_e	0
ASPTA	-0.480463
KAT141	0
TARTRtex	0
PSD161	0.000265544
GLU5K	0.188665
PSD160	0.000263454
TARTR_Ltpp	0
DXPS	0.000746228
FACOAL121	0
FACOAL120	0.0952995
VALTRS	0.0490486
EX_D_araba_e	0
PHAS	1.1037
EX_mg2_e	-0.000963385
SUCCD1	1.11266
MEPCT	0.000720584
EX_lac_L_e	0
METAT	0.000551827
ETOHtex	0
3HAD100	0.0276153
FRDOr	0.187577
THRTRS	0.0359255
EX_co2_e	10.1768
TMPPP	2.56e-05
KAT121	0
HACDHG	0
PRMICI	0.00791295
EX_araba_e	0
VALTA	0.0490486
FCLT	5.13e-05
PRFGS	0.0315296
MFPGS5	0
TYRTA	0.00884033
T2DECAI	0.0129434
THMBIOS2	2.56e-05
THMBIOS3	2.56e-05
THMBIOS4	2.56e-05
PPCDC	2.56e-05
FACOAL100	0.0914333
PPA2	0.180715
RPI	-0.0303821
DHXANTI	0
EX_DM_trnaphe	-0.0158766
ORPT	0.0204984
DHXANTH	0
GMPS2	0.193057
PYK	-1.11348
RPE	-0.0305337
PTA2	0
ASAD	0.316144
ACPS1	0.0614157
FMNRx2	-3.85e-05
HACOAEPI141	0
BMMALCOAL	1.07001
EX_DM_thif	-1.06e-22
PRAMPC	0.00791295
FUM	1.19756
EX_fe2_e	-0.000937555
EX_acac_e	0
EX_DM_thil	-7.58e-21
KAT181	0
HGBAMS	2.56e-05
DHDPRy	0.0300856
EX_DM_trnagln	-0.0323931
BRFAPS	0
EX_DM_this	1.78e-20
EX_ppa_e	0
LPLIPAL1E181	0
LEUTAi	0.0463534
EX_DM_trnaglu	-0.0321455
ACONT	0.1778
EX_DM_trnagly	-0.136917
FPGS10	0
ENCOAI162	0
FACOAL161	0
ENCOAI161	0
FACOAL160	0.0971496
NNDMBRT	2.56e-05
ALAR	-0.12886
ALAS	0.000820594
ORNDC	0.00529874
NADK	0.000285167
EX_cu2_e	-0.000385354
DBTSr	2.56e-05
GLUtex	0
HACOAEPI121	0
GAPD	-0.43061
CU2abcpp	0.0877292
KDOPS	2.34e-05
GLYAMDTRc	0
UPP3S	0.000102574
UPP3MT	5.13e-05
KDOPP	2.34e-05
THD2pp	0.619108
EX_so4_e	-0.00736981
ETHMALCOAM	1.07001
LPLIPAL1E160	0
LPLIPAL1E161	0
KAT161	0
HSK	0.279432
EX_glyclt_e	0
MLMPTDHy	3.63253
PHBD2	1.07131
ENCOAI182	0
FACOAL141	0
ENCOAI181	0
FRTT	0.000115887
FACOAL140	0.0930614
ASP1DC	2.56e-05
DHQS	0.0248227
CBPS	0.0486421
LDH_L	0
ETHAtex	0
THZS	2.56e-05
DNMPPA	9.56e-06
EX_mobd_e	-0.000410998
DHQD	0.0248227
CLt4	0.000578031
GLYTRS	0.136917
Kabcpp	0.171972
PPAt7	0
MALDHDC	0.176
HNEUROPNS2	4.51e-05
EX_dha_e	0
HNEUROPNS1	4.51e-05
ACPPAT181	0.100341
UAAGDS	1.17e-05
SDPDS	0.0300856
HACOAEPI181	0
MCPST	0
ACPPAT180	0.125906
AIRCr	0.0315039
IG3PS	0.00791295
MOBDtex	0.000410998
GLYCLTtex	0
ACOTA	-0.269439
TMDS	0
PRAIS	0.0315296
ANACMURLALAA	0
UPPDC1	5.13e-05
ARABA_Dtex	0
EX_arab_D_e	0
SPOTN	2.56e-05
3OAR40	0.0276153
XYLtex	0
SSALyr	0
UDPGDr	0
DTPCUDCPPP	1.17e-05
PPC	1.16165
PPA	1.58665
BTCOAC	0.570847
3HAD181	0.0121624
PPDODH	0
3HAD180	0.033527
ACPPAT161	0.088767
ACPPAT160	0.0970985
HACOAEPI161	0
MLMPTDH	11.2362
PRAI	7.05e-05
CBLAT	0
DPCOAK	0.0614413
FTHFL	2.72458
EX_akg_e	0
ILETRS	0.0243556
ASPO6	0.000801845
PRE5MT	2.56e-05
FACOAL180	0.127888
FACOAL181	0
FALDHp	0
TRSARr	0
DHOANTC	0
PRBK	0
LPLIP2AGPC160	0
DHFS	9.56e-06
PGPP160	0.000116232
DHFR	9.56e-06
EX_meoh_e	0
PGPP161	0.000117148
3HAD160	0.0146136
3HAD161	0.0129434
LGTHL	0
PTAr	-0.276313
FMFTFMPT	14.8688
PMPK	2.56e-05
GMAND	0
G3PD2	0.00940295
12PPDStex	0
3OAR80	0.0276153
METTRS	0.00657543
TRPS2	0.10755
AMAOTr	2.56e-05
FALDA	0
ADOCBLPS	1.28e-05
H2MPTR2	3.85e-05
PRATPP	0.00791295
OMMBZH2	2.56e-05
ADMDCr	0
PGPP180	0.000112178
EX_DM_5dr1p	7.69e-05
3HAD140	0.0146136
PGPP181	0.00182436
TMPKr	2.56e-05
3HAD141	0.0129434
EX_h2o2_e	0
EX_asp_L_e	0
EX_DM_trnaleu	-0.0463534
DUTPDP	0.00178524
3PSMES	0.0248227
FMETTRS	0
NAtex	0.00047527
MI3PP	0
2AGPEAT160acp	-1.62e-15
OCOAT1r	1.07131
ADCMS2	0
PSD181	0.0041352
PSD180	0.000254264
3OAR60	0.0276153
ADOCBIK	0
PERD	2.56e-05
H2MB4P	0.000720584
UDPACGAM	0
HACOADH121	0
E4PD	2.56e-05
CLtex	0.000578031
KDOCT	2.34e-05
3OAR160	0.0146136
ADSL1r	0.0252507
3OAR161	0.0129434
PHYNS2	4.51e-05
PGI	0.120039
HFACOAE60	0
PGK	0.43061
GF6PTAr	0.00392232
UAMAGS	1.17e-05
PGM	0.679195
MMPTC	14.8688
MG2tex	0.000963385
MPTAT	2.56e-05
FUMtex	0
EX_cl_e	-0.000578031
LPLIP1AGPC160	0
PPBNGS	0.000410297
PAPR	0.0350405
PYRt2rpp	0
PSP_D	0
MALCOATE	0.172204
OCMPH2	2.56e-05
PIt2rpp	0.0379861
PSP_L	0.248585
SPMS	0
FACOAE180	0.0951091
EX_pi_e	-0.081652
UGMDDS	1.17e-05
OCBT	0.0281437
MNtex	0.000385354
HEMEOS	2.56e-05
BDH	1.07131
G5SD	0.188665
AGPR	0.269439
3OAR140	0.0146603
3OAR141	0.0129434
EX_ribona_e	0
OHPHM	2.56e-05
GALCDARABtex	0
O2tex	22.613
ARABAtex	0
MAN1PT	0
ADSL2r	0.0315039
TALA	-0.0305337
AGPAT161	0.000390504
3HAD60	0.0276153
PGCDr	0.248585
AGPAT160	0.000387434
GTHPp	0.0341674
FACOAE160	0.116838
PDH	0.762472
3OAR120	0.014672
ILETA	0.0243556
3OAR121	0.0129434
MTAP	0
EX_k_e	-0.0215413
H2Otex	-26.5126
DAPE	0.0300856
ASPK	0.316144
EX_DM_h2mpt	-3.85e-05
NO3tex	1.20858
EX_xyl_D_e	0
HMPK1	0
Htex	3.06838
PDX5PO	2.56e-05
UPP3MT2	5.13e-05
FORtex	0
GTHOr	0.0341674
ACS2	0
AGPAT180	0.000373919
G5SADr	0.424662
AGPAT181	0.00608118
EX_etoh_e	0
UAPGR	1.17e-05
NDPK8	0.0957151
NDPK7	0.00566786
ATPS4rpp	29.2431
3HAD80	0.0276153
NDPK5	0.0963856
NDPK4	0.168031
NDPK3	0.097708
FACOAE140	0.0930614
NDPK2	0.160792
NDPK1	0.133529
CA2NAtpp	0.00047527
METACH	0.00662671
GGTT	2.56e-05
ANPRT	7.05e-05
AKGt2rpp	0
EX_12ppd_S_e	0
HFACOAE80	0
3OAR100	0.0276153
MECDPS	0.000720584
GLNS	2.07
F6PPKL	0.0553692
Zn2tex	0.000385354
MG2uabcpp	0.000963385
ACOATA	0.0276153
EX_fald_e	0
EX_nh4_e	0
MOHMT	2.56e-05
CMBLD2	0
5DGLCNtex	0
AGDC_r	0
HCO3E	1.92845
CMBLD4	0
CMBLD3	0
OXAFORtpp	0
EX_na1_e	-0.00047527
EX_oxa_e	0
PHYNDH2	4.51e-05
QULNS	0.000801845
GLUCYS	2.56e-05
EX_glc_e	0
IGPDH	0.00791295
ICDHyr	0.1778
MACACI	0
FORMMFRHD	14.8688
R3HAD40	0.0276153
ENCOAI141	0
ENCOAI142	0
ACGLCAM	0
ARGSSr	0.0281437
FACOAE60	0.0903708
ACOAD161	0
UMPK	0.112258
PRASCS	0.0315039
ASNS1	0
SDPTA	0.0300856
TPI	0.220069
PSSA181	0.00425682
PSSA180	0.000261742
NH4tpp	4.77e-18
TRE6PP	0.00414805
TRE6PS	0.00414805
THRPD	2.56e-05
ACBIPGT	2.56e-05
MAN6PI	0
THRPS	2.56e-05
MESACOAH	1.07001
LPLIPAL1C180	0
ADCYRS	2.56e-05
LPLIPAL1C181	0
EX_DM_trnacys	-0.000113964
EX_no3_e	-1.20858
ETOHDH	0
ARGSL	0.0281437
PTHPS	0
ENCOAI121	0
ASPTRNAAMT	0.0291596
EX_o2_e	-22.613
ACODA	0.104643
ENCOAI122	0
RZ5PP	1.29e-05
ASPTRS	0.0289354
NNAMr	0
UDPG4E	0
ACGS	0.104643
ACOAD181	0
Ktex	0.0215413
HACOADH181	0
HACOADH180	0
HTHRPD	2.56e-05
ACGK	0.269439
FACOAE80	0.0880902
CMPKDOT2	1.17e-05
CMPKDOT1	1.17e-05
HEMEDS2	2.56e-05
SPODM	0
PSSA161	0.000273356
PSSA160	0.000271202
GLYCOX3	0
GLYCOX4	0
OXAtex	0
PPNCL2	2.56e-05
GLYCOX5	2.56e-05
UHGADA	2.34e-05
THRS	0.279432
BB_RMN	0.0712567
METSr	0.00705032
EX_DM_trnahis	-0.00791295
THRA	0.219125
LPLIPAL1C161	0
HMBS	0.000102574
CYSTL	0
CYSSr	0.000190895
ACOAD121	0
CBIAT	0
FMNAT	2.56e-05
ENCOAI101	0
PGLYCP	0
KARA2	0.0243556
HACOADH160	0
HACOADH161	0
DHPS2	9.56e-06
SADT	0.0350405
PC20M	2.56e-05
KARA1	0.0954277
2DRIBOAtex	0
IPPMIb	0.0463534
G1PTT	0.0712567
SKMK	0.0248227
EX_fum_e	0
PC6AR	2.56e-05
3OAR181	0.0121624
GLYCK2	2.63473
H2O2tpp	-0.123398
H2MB4PRD2	0.000572006
EX_DM_trnapro	-0.036298
U23GAAT	2.34e-05
THMBTHIC	2.56e-05
ACOAD141	0
DPR	2.56e-05
SERGLXAT	2.63473
EX_2kdrib_e	0
3OAR180	0.033527
HACOADH141	0
5DGLCNt2rpp	0
MPTFALDA	14.8688
3HBCD	0.337573
PMDPHT	6.41e-05
CO2tex	-10.1768
NTD10	0
NTD11	0
EX_lyxnt_e	0
ACKr	0.220944
ACLS	0.0954277
FALDtpp	14.8688
HSDyi	0.286059
ATPPRTr	0.00791295
NNDPR	0.000801845
NO3Ras	0
EX_DM_trnaarg	-0.0281437
PPTT	2.56e-05
PTRCtex	0
GLUSy	1.48924
LPLIPAL2E180	0
EX_succ_e	0
LPLIPAL2E181	0
PIuabcpp	0.0436659
THMBIOS	2.56e-05
FE2t2pp	0.000550119
NNATr	0.000801845
EX_DM_trnalys	-0.030074
ARAB_Dtex	0
ALDD2y	0.219125
HPTRED	0
PHYNDH2_e	0
MPTSA	5.13e-05
TRDR	0.0463762
FE2abcpp	0.000387436
ZCARDS_e	0
3OAS100	0.0276153
PGAMT	-0.00392232
OMBZLM	2.56e-05
ETHMALCOAEPM	1.07001
RBFK	6.41e-05
MNt2pp	0.000385354
HBZOPT	2.56e-05
LPLIPAL2E160	5.65e-16
DHNPA2	9.56e-06
LPLIPAL2E161	0
PHYNDH	4.51e-05
EX_DM_trnatyr	-0.00881468
EX_lyx_L_e	0
CHRPL	2.56e-05
SERAT	0.000190895
PPCOAC	1.07001
H2O2syn	0.111917
TYRTRS	0.00881468
2AGPEAT181acp	0
PMANM	0
NTD9	0
HFACOAE180	0
NTD7	-0.000423609
EX_DM_rbrdxOX	0
L_LACtex	0
UDPDPS5	7.05e-06
UDPDPS6	7.05e-06
UDPDPS3	7.05e-06
ENO	1.95554
UDPDPS4	7.05e-06
MME	1.07001
CYRDAAT	2.56e-05
H2Otpp	-11.4105
UDPDPS9	7.05e-06
UDPDPS7	7.05e-06
GHMT2r	2.64477
UDPDPS8	7.05e-06
3OAS121	0.0129434
3OAS120	0.014672
MMM2r	1.07001
AACOAR	0.766686
ADOCBLPPA	1.28e-05
ECOAH5	0.0130909
ECOAH6	0.0130909
BB_ACGAM	0.00387561
ECOAH3	0.0130909
ECOAH4	0.0130909
AOXSr	2.56e-05
GARFT	0.0315296
ECOAH7	0.0130909
COBS2	1.29e-05
ECOAH8	0.0327792
EX_DM_trnaasn	-0.0291596
ECOAH1	0.719343
ECOAH2	0.0130909
EX_DM_trnaasp	-0.0289354
CO2tpp	-10.1768
FMNDESTRUC	1.28e-05
TDPGDH	0.0712567
PHETA1	0.0158766
HISTP	0.00791295
ADCS	9.56e-06
GALU	0.0446348
CCRC	0.499161
IPPS2	0.0463534
HISTRS	0.00791295
ACOAD2f	0.0130909
CU2abctpp	0.0881146
MMAtex	0
PEMT160	0
HACYLCOAEPI80	0
ADCL	9.56e-06
PEMT161	0
EX_etha_e	0
CTPS2	0.0158265
ACHBS	0.0243556
ORNTAC	0.164796
EX_ptrc_e	0
ACOAD3f	0.0130909
DMATT	0.000148579
FDHr	12.1444
ETMAt_e	0
AROGDH	0
GTPCI	9.56e-06
SO4tex	0.00736981
LDH_D3	0
HSPMDS	0
HSPMS	0
DCTPD	0.00178524
BIOTINS	2.56e-05
PAPPT3	1.17e-05
COBALT2tex	2.56e-05
PAPPT1	0
HISTD	0.00791295
DVPCLPHVR	0
UQCYOR_2p	0.0880679
EX_galcDaraba_e	0
EX_arab_L_e	0
ACOAD1f	-0.327271
SULR	0.00689454
G1PACT	0.00392232
DMQMT2	2.56e-05
ANS	7.05e-05
MSUCCCOADH	1.07001
NTPP7	0.0949892
NIGOSH	0
NTPP8	0.0917365
ACOAD6f	0.0130909
NTPP3	0
NTPP4	0.0953732
UAGCVT	1.17e-05
CU2tex	0.000385354
NTPP5	0.0939298
NTPP6	0.0993318
HFACOAE120	0
EAR121y	0.0129434
ALAALAr	1.17e-05
FALDtex	0
ECOAH181	0
GLYKr	0
EX_mn2_e	-0.000385354
DGK1	0.092503
ACOAD7f	0.0130909
3OAS180	0.033527
3OAS181	0.0121624
NAPRTr	-2.56e-05
NADH11	13.6085
HACYLCOAEPI40	0.674588
FACOAE120	0.0952995
DHAtex	0
PNTK	2.56e-05
PHOTOSYS1C	0.186857
OMPDC	0.0204984
H2O2tex	0
SERTRS	0.0362116
Kt3pp	0.15043
ACOAD4f	0.0130909
CO2DAMR	2.56e-05
AMMQT8_2	0
CO2DAMS	0
CYOD	0.0405124
EX_glu_L_e	0
HFACOAE100	0
EX_DM_oxEA	-4.58e-20
GRTT	0.000148579
THDPS	0.0300856
PRPPS	0.0609159
EAR180y	0.033527
DAPDC	0.030074
CREAH	0
EX_zn2_e	-0.000385354
A5PISO	-2.34e-05
KAS14	0.0276153
SHCHF	2.56e-05
ACOAD5f	0.0130909
CS	0.1778
MDH	-0.503384
PROTRS	0.036298
BPNT	0.0964562
HACYLCOAEPI60	0
3OAS60	0.0276153
ECOAH161	0
FACOAE100	0.0914333
NFORGLUAH	0
TDPDRR	0.0712567
EX_mal_L_e	0
HFACOAE160	0
ACACtex	0
TDPDRE	0.0712567
ARBtex	0
MTHFR3	0.00705032
OMCDC	0.0463534
EX_cit_e	0
DPGM	0
GLYD	2.63473
O2tpp	7.74426
MEOHtex	0
ACCOACr	0.238978
EX_glcn_e	0
DHAD2	0.0243556
GLYOX	0
DHAD1	0.0954277
DASYN160	0.000387434
3OAS140	0.0146603
BTS6	2.56e-05
3OAS141	0.0129434
DASYN161	0.000390504
NH4tex	0
MALCOAL	1.52494
ECOAH141	0
SULFOX2	0.028146
3OAS80	0.0276153
EX_tartr_L_e	0
MALCOAS	1.69715
EX_2driboa_e	0
OCTDPS2	2.56e-05
PRAGSr	0.0315296
MPTSS	2.56e-05
MPTSP	2.56e-05
HFACOAE140	0
UDPGCGT	0
EX_DM_trnaser	-0.0362116
UAGPT3	1.17e-05
FT	7.05e-06
ACOAD8f	0.0327792
EX_cobalt2_e	-2.56e-05
LPADSS	1.17e-05
GLYO1	0.0397689
DHDPS	0.0300856
GLCNtex	0
GLUR	0.173937
GK1	0.112161
MCOATA	0.238927
CELLS	0.0404867
EX_mma_e	0
EAR120y	0.014672
ASPTRS_tASN	0.0291596
SDACT	7.69e-05
SPMDAT1	0
SUCCtex	0
EX_DM_trnamet	-0.00657543
OHPBAT	2.56e-05
DASYN180	0.000373919
ZNabcpp	0.000385354
NTPP1	0.092503
NTPP2	0.0979689
DASYN181	0.00608118
GALCDARABAtex	0
RBFSa	0.000128218
3OAS160	0.0146136
3OAS161	0.0129434
EAR100y	0.014672
RBFSb	6.41e-05
ECOAH121	0
DADK	0.0939298
Biomass_Mextorquens_AM1_core	0.116774
EX_ch4_e	-14.8688
CH4tex	14.8688
PMMOipp	14.8688
PMMODCipp	0
ALDD1	0
N2trpp	0
N2tex	0
EX_n2_e	0
EX_no2_e	0.0662986
NO2tex	-0.0662986
SAMMOi	0.0313353
NO3t7pp	1.20858
NO3R1	1.20858
NTRIR2x	1.15571
PAMMOipp	1.89e-17
HAMtpp	-0.0134251
NO2tpp	1.15571
NORZ2	0
NIT_mc	0
SMMOi	0
CH4trpp	0
ANHMK	0
METSOXR2	0
NADPHQR2	0.183402
QRr	0.17828
UACMAMO	0
NDPK6	0
NDPK9	0
NDPK10	0
LIPOS	0
GTHRDHpp	0
PPS	0.178075
ORNTA	0.235997
CLPNS160	0
CLPNS161	0
CLPNS180	0
CLPNS181	0
SHSL2	0
XPPT	0
MSAR	0
BACCL	0
HGNTOR	0
34HPPOR	0
FTHFCL	0
CPPPGO2	0
GLUDy	0.123861
GLUDxi	0.112136
UDPGDC	0
HCITS	0
TRPAS2	0.217086
NTPTP1	0
HOPNTAL	0
CCGS	0
DAAD	0
HMGL	0
HEX7	0
LIPOCT	0
PFK_ppi	1.55013
PFK	0
SQLC	0
SQLC2	0
ACM6PH	0
CHOLD	0
TMDS3	0.00178524
OXADC	0
METGL	0
UREA	0
SCYSDS	0
MOCDS	0
MCITD	0
NMNS	0
DHCYTCPEROX	0.0892302
PPK2	0.180689
HAMR	0.0179102
HAORipp	0.0134251
ACSPW	0.762472
